# Supplementary material for: Soil Fungal Communities Investigated by Metabarcoding Within Simulated Forensic Burial Contexts
Source: Front Microbiol. 2020 Jul 24;11:1686. doi: 10.3389/fmicb.2020.01686 (PMC7393272; doi:10.3389/fmicb.2020.01686)
Supplement: Supplementary file 2 [file Data_Sheet_2.XLSX]

## Sheet: Library A
	Family	estimate1	estimate2	statistic	p.value	parameter	conf.low	conf.high	method	alternative	Compare	fdr.adjusted	sign
1	OTU1003_unidentified_fungus	111.333	63.6667	1.46415	0.217003	4	-42.7231	138.056	Two Sample t-test	two.sided	C1 vs P1	0.349151
2	OTU1054_unidentified_fungus	81	35	1.43146	0.225554	4	-43.2214	135.221	Two Sample t-test	two.sided	C1 vs P1	0.357125
3	OTU1057_Incertae_sedis	7.33333	16.6667	-1.12999	0.32165	4	-32.2659	13.5992	Two Sample t-test	two.sided	C1 vs P1	0.440078
4	OTU1059_Sordariaceae	6	56.3333	-1.76478	0.152364	4	-129.52	28.8535	Two Sample t-test	two.sided	C1 vs P1	0.278976
5	OTU1084_Gigasporaceae	13	8.66667	0.708155	0.517933	4	-12.6563	21.3229	Two Sample t-test	two.sided	C1 vs P1	0.629034
6	OTU1096_Hypocreaceae	118	128.667	-0.157998	0.882114	4	-198.108	176.775	Two Sample t-test	two.sided	C1 vs P1	0.924797
7	OTU1104_unidentified_fungus	97.3333	228.667	-1.91933	0.12737	4	-321.316	58.6498	Two Sample t-test	two.sided	C1 vs P1	0.247136
8	OTU1113_unidentified_fungus	48	53	-0.339945	0.750999	4	-45.8367	35.8367	Two Sample t-test	two.sided	C1 vs P1	0.80895
9	OTU1130_Serendipitaceae	234.333	10	2.96002	0.0415535	4	13.9129	434.754	Two Sample t-test	two.sided	C1 vs P1	0.125627
10	OTU1140_Incertae_sedis	44.3333	3.33333	5.1977	0.00652645	4	19.0991	62.9009	Two Sample t-test	two.sided	C1 vs P1	0.0446546	.
11	OTU1174_Helvellaceae	45.6667	15	1.53184	0.200322	4	-24.9162	86.2495	Two Sample t-test	two.sided	C1 vs P1	0.342656
12	OTU1234_Pleosporaceae	98.3333	16.3333	2.25565	0.0870989	4	-18.9327	182.933	Two Sample t-test	two.sided	C1 vs P1	0.208731
13	OTU1260_unidentified_fungus	157.667	139	0.548125	0.612759	4	-75.8866	113.22	Two Sample t-test	two.sided	C1 vs P1	0.697956
14	OTU1262_Apiosporaceae	54.3333	66	-0.65515	0.548135	4	-61.1085	37.7752	Two Sample t-test	two.sided	C1 vs P1	0.647796
15	OTU1268_unidentified_fungus	15.3333	0.666667	10.6716	0.00043675	4	10.8508	18.4825	Two Sample t-test	two.sided	C1 vs P1	0.0113555	.
16	OTU1287_Ceratobasidiaceae	72.6667	3	3.42485	0.0266613	4	13.1895	126.144	Two Sample t-test	two.sided	C1 vs P1	0.0986549
17	OTU1291_Herpotrichiellaceae	117.667	162.333	-1.41327	0.230457	4	-132.417	43.0834	Two Sample t-test	two.sided	C1 vs P1	0.357125
18	OTU1341_Trapeliaceae	37	1.33333	1.86235	0.13603	4	-17.5063	88.8396	Two Sample t-test	two.sided	C1 vs P1	0.256289
19	OTU1379_Incertae_sedis	51	313.333	-2.36125	0.0775575	4	-570.795	46.1285	Two Sample t-test	two.sided	C1 vs P1	0.195685
20	OTU1448_unidentified_fungus	350.667	6.66667	5.85278	0.00425184	4	180.813	507.187	Two Sample t-test	two.sided	C1 vs P1	0.0345462	.
21	OTU151_Entolomataceae	998.667	47	8.48617	0.00105714	4	640.307	1263.03	Two Sample t-test	two.sided	C1 vs P1	0.0152698	.
22	OTU1545_Helotiaceae	370.667	271.333	1.14977	0.314305	4	-140.534	339.201	Two Sample t-test	two.sided	C1 vs P1	0.438795
23	OTU1585_unidentified_fungus	14.3333	5	1.25345	0.278307	4	-11.3404	30.007	Two Sample t-test	two.sided	C1 vs P1	0.401998
24	OTU1594_Tricholomataceae	18.3333	0.666667	2.70817	0.0536385	4	-0.445367	35.7787	Two Sample t-test	two.sided	C1 vs P1	0.154956
25	OTU1598_Fomitopsidaceae	0.666667	9	-1.37412	0.241372	4	-25.171	8.50433	Two Sample t-test	two.sided	C1 vs P1	0.357125
26	OTU1649_Lasiosphaeriaceae	754.667	254.333	2.3779	0.076163	4	-83.8575	1084.52	Two Sample t-test	two.sided	C1 vs P1	0.195685
27	OTU1653_unidentified_fungus	60	61	-0.02798	0.979018	4	-100.23	98.2296	Two Sample t-test	two.sided	C1 vs P1	0.979018
28	OTU1654_Piskurozymaceae	2291.33	1155.33	4.63307	0.00978464	4	455.234	1816.77	Two Sample t-test	two.sided	C1 vs P1	0.0530001
29	OTU1725_Phaeosphaeriaceae	201	75.3333	3.2591	0.0311074	4	18.6104	232.723	Two Sample t-test	two.sided	C1 vs P1	0.1034
30	OTU1733_Hoehnelomycetaceae	29	24.3333	0.180905	0.865238	4	-66.9551	76.2884	Two Sample t-test	two.sided	C1 vs P1	0.91448
31	OTU1740_Schizoporaceae	1.66667	1	0.5	0.64333	4	-3.03526	4.36859	Two Sample t-test	two.sided	C1 vs P1	0.720973
32	OTU1743_unidentified_fungus	1	10.6667	-1.90394	0.129648	4	-23.7632	4.42985	Two Sample t-test	two.sided	C1 vs P1	0.247856
33	OTU1765_unidentified_fungus	5.66667	46.6667	-4.29273	0.0127186	4	-67.5179	-14.4821	Two Sample t-test	two.sided	C1 vs P1	0.0590507
34	OTU1779_Mortierellaceae	17531	32281	-4.11057	0.0147253	4	-24712.8	-4787.25	Two Sample t-test	two.sided	C1 vs P1	0.0660101
35	OTU1805_Thelebolaceae	178	150	0.390373	0.716158	4	-171.144	227.144	Two Sample t-test	two.sided	C1 vs P1	0.788988
36	OTU1813_Cordycipitaceae	5.66667	62.6667	-10.8585	0.00040823	4	-71.5745	-42.4255	Two Sample t-test	two.sided	C1 vs P1	0.0113555	.
37	OTU1816_Pseudeurotiaceae	7350.33	1752	5.93673	0.00403623	4	2980.15	8216.52	Two Sample t-test	two.sided	C1 vs P1	0.0345462	.
38	OTU1822_Verrucariaceae	6.66667	7	-0.0381246	0.971415	4	-24.6085	23.9418	Two Sample t-test	two.sided	C1 vs P1	0.978946
39	OTU1823_Chaetomiaceae	304.333	292.667	0.105634	0.920958	4	-294.975	318.309	Two Sample t-test	two.sided	C1 vs P1	0.950195
40	OTU1843_Myrmecridiaceae	20.3333	144	-2.28773	0.0840673	4	-273.752	26.4184	Two Sample t-test	two.sided	C1 vs P1	0.206203
41	OTU1868_unidentified_fungus	210.333	65.3333	4.79909	0.00865389	4	61.1123	228.888	Two Sample t-test	two.sided	C1 vs P1	0.0489133	.
42	OTU1897_Pleurotheciaceae	15.3333	0	1.24324	0.28167	4	-18.9095	49.5762	Two Sample t-test	two.sided	C1 vs P1	0.402386
43	OTU1899_Aspergillaceae	26	82	-4.91783	0.00794171	4	-87.6157	-24.3843	Two Sample t-test	two.sided	C1 vs P1	0.0489069	.
44	OTU1938_Ascodesmidaceae	18	2.33333	1.57368	0.190674	4	-11.9741	43.3074	Two Sample t-test	two.sided	C1 vs P1	0.330501
45	OTU1984_Myxotrichaceae	4.33333	22.6667	-2.21962	0.0906506	4	-41.2659	4.5992	Two Sample t-test	two.sided	C1 vs P1	0.210337
46	OTU2113_Chrysozymaceae	10.3333	0	1.5002	0.207952	4	-8.7908	29.4575	Two Sample t-test	two.sided	C1 vs P1	0.349151
47	OTU2147_Rhizopogonaceae	4.33333	0.333333	2.35339	0.0782249	4	-0.719049	8.71905	Two Sample t-test	two.sided	C1 vs P1	0.195685
48	OTU2164_Stachybotryaceae	11	10	0.126323	0.905572	4	-20.979	22.979	Two Sample t-test	two.sided	C1 vs P1	0.941794
49	OTU2270_Arthopyreniaceae	20.6667	1.33333	1.97092	0.120043	4	-7.90163	46.5683	Two Sample t-test	two.sided	C1 vs P1	0.245789
50	OTU2276_Cephalothecaceae	0.666667	10.6667	-6.25543	0.00333066	4	-14.4385	-5.56155	Two Sample t-test	two.sided	C1 vs P1	0.0333066	.
51	OTU2383_Incertae_sedis	279.667	164	1.3505	0.248204	4	-122.128	353.461	Two Sample t-test	two.sided	C1 vs P1	0.362545
52	OTU240_Orbiliaceae	37	19	0.872786	0.432041	4	-39.2603	75.2603	Two Sample t-test	two.sided	C1 vs P1	0.550641
53	OTU2418_Halomycetaceae	98	8	3.56127	0.0235591	4	19.8341	160.166	Two Sample t-test	two.sided	C1 vs P1	0.0928087
54	OTU2419_Ophiocordycipitaceae	54.3333	18.3333	3.39831	0.0273198	4	6.58773	65.4123	Two Sample t-test	two.sided	C1 vs P1	0.0986549
55	OTU2421_unidentified_fungus	113.333	11.6667	8.53502	0.00103418	4	68.5945	134.739	Two Sample t-test	two.sided	C1 vs P1	0.0152698	.
56	OTU2426_unidentified_fungus	11.6667	5.66667	5.4272	0.00559023	4	2.93052	9.06948	Two Sample t-test	two.sided	C1 vs P1	0.0403739	.
57	OTU2500_Dermateaceae	9.33333	6.66667	0.33716	0.752945	4	-19.2928	24.6261	Two Sample t-test	two.sided	C1 vs P1	0.80895
58	OTU2529_Incertae_sedis	985.667	232.333	3.04141	0.0383494	4	65.6288	1441.04	Two Sample t-test	two.sided	C1 vs P1	0.1187
59	OTU2572_Saccharomycodaceae	21	6	2.48851	0.0675925	4	-1.73562	31.7356	Two Sample t-test	two.sided	C1 vs P1	0.186958
60	OTU2573_Melanommataceae	388.333	114.333	5.74895	0.00453842	4	141.672	406.328	Two Sample t-test	two.sided	C1 vs P1	0.0347055	.
61	OTU2628_Cladosporiaceae	4	6.33333	-0.371521	0.729092	4	-19.7707	15.1041	Two Sample t-test	two.sided	C1 vs P1	0.796487
62	OTU2631_unidentified_fungus	146	73.3333	2.08234	0.105743	4	-24.222	169.555	Two Sample t-test	two.sided	C1 vs P1	0.225354
63	OTU2682_Leptosphaeriaceae	35	3.33333	2.62275	0.0586301	4	-1.85571	65.189	Two Sample t-test	two.sided	C1 vs P1	0.165694
64	OTU2683_Microascaceae	155	138.333	0.296091	0.781896	4	-139.616	172.95	Two Sample t-test	two.sided	C1 vs P1	0.833168
65	OTU272_Kickxellaceae	4	6.66667	-0.678551	0.534651	4	-13.5779	8.2446	Two Sample t-test	two.sided	C1 vs P1	0.637657
66	OTU2738_unidentified_fungus	893.667	170	3.05567	0.0378179	4	66.129	1381.2	Two Sample t-test	two.sided	C1 vs P1	0.1187
67	OTU2739_Bionectriaceae	306.333	145	4.86046	0.00827656	4	69.1747	253.492	Two Sample t-test	two.sided	C1 vs P1	0.0489069	.
68	OTU2740_Tremellaceae	131	56.3333	2.35282	0.0782742	4	-13.4439	162.777	Two Sample t-test	two.sided	C1 vs P1	0.195685
69	OTU2745_Lipomycetaceae	12	5.66667	0.793045	0.472137	4	-15.8396	28.5063	Two Sample t-test	two.sided	C1 vs P1	0.595902
70	OTU2806_Mycosphaerellaceae	156	368.333	-1.46202	0.217548	4	-615.563	190.896	Two Sample t-test	two.sided	C1 vs P1	0.349151
71	OTU2807_Hyaloscyphaceae	107	67	2.20416	0.0922246	4	-10.3857	90.3857	Two Sample t-test	two.sided	C1 vs P1	0.210337
72	OTU2840_Phomatosporaceae	14.3333	93	-1.39418	0.235716	4	-235.328	77.9942	Two Sample t-test	two.sided	C1 vs P1	0.357125
73	OTU2889_Lentitheciaceae	20.3333	3.33333	1.93873	0.124559	4	-7.34562	41.3456	Two Sample t-test	two.sided	C1 vs P1	0.247136
74	OTU2914_Nectriaceae	2268	2704	-0.54069	0.617423	4	-2674.86	1802.86	Two Sample t-test	two.sided	C1 vs P1	0.697956
75	OTU2943_unidentified_fungus	205.333	137.333	0.956872	0.392819	4	-129.308	265.308	Two Sample t-test	two.sided	C1 vs P1	0.510664
76	OTU2945_Reticulascaceae	14	0	1.99323	0.117018	4	-5.50111	33.5011	Two Sample t-test	two.sided	C1 vs P1	0.24536
77	OTU2946_unidentified_fungus	26.6667	8.33333	2.11382	0.10205	4	-5.74698	42.4136	Two Sample t-test	two.sided	C1 vs P1	0.224856
78	OTU2950_Mrakiaceae	29.6667	179	-2.36261	0.077442	4	-324.824	26.1571	Two Sample t-test	two.sided	C1 vs P1	0.195685
79	OTU2956_unidentified_fungus	1117.33	32.3333	22.3444	2.37521e-05	4	950.181	1219.82	Two Sample t-test	two.sided	C1 vs P1	0.00308777	*
80	OTU2982_unidentified_fungus	2064.33	837.667	4.43563	0.0113723	4	458.846	1994.49	Two Sample t-test	two.sided	C1 vs P1	0.0547555
81	OTU298_Glomeraceae	23.3333	1.33333	4.47008	0.011074	4	8.33543	35.6646	Two Sample t-test	two.sided	C1 vs P1	0.0547555
82	OTU2993_unidentified_fungus	6.33333	0	2.17945	0.0948028	4	-1.73483	14.4015	Two Sample t-test	two.sided	C1 vs P1	0.212489
83	OTU303_Meruliaceae	24.6667	0.666667	6.36396	0.00312559	4	13.5294	34.4706	Two Sample t-test	two.sided	C1 vs P1	0.0333066	.
84	OTU3052_Chaetosphaeriaceae	87.3333	565.333	-1.84486	0.138815	4	-1197.37	241.374	Two Sample t-test	two.sided	C1 vs P1	0.257799
85	OTU3055_Periconiaceae	31	170.667	-3.26955	0.0308023	4	-258.269	-21.0641	Two Sample t-test	two.sided	C1 vs P1	0.1034
86	OTU3057_Teratosphaeriaceae	23	34	-0.959854	0.391484	4	-42.8183	20.8183	Two Sample t-test	two.sided	C1 vs P1	0.510664
87	OTU3067_unidentified_fungus	702.333	30	5.07626	0.00709927	4	304.603	1040.06	Two Sample t-test	two.sided	C1 vs P1	0.0461453	.
88	OTU3128_Diversisporaceae	15.3333	144.333	-5.98724	0.00391294	4	-188.821	-69.1792	Two Sample t-test	two.sided	C1 vs P1	0.0345462	.
89	OTU3136_Plectosphaerellaceae	80.6667	49.6667	0.602665	0.579231	4	-111.815	173.815	Two Sample t-test	two.sided	C1 vs P1	0.678379
90	OTU3188_unidentified_fungus	96.6667	19	3.71483	0.0205671	4	19.619	135.714	Two Sample t-test	two.sided	C1 vs P1	0.083554
91	OTU3258_Filobasidiaceae	96.6667	14.3333	4.46807	0.0110911	4	31.1717	133.495	Two Sample t-test	two.sided	C1 vs P1	0.0547555
92	OTU3259_Trichocomaceae	30	23.6667	0.458531	0.670378	4	-32.0156	44.6822	Two Sample t-test	two.sided	C1 vs P1	0.744865
93	OTU3261_unidentified_fungus	10738.3	10922.3	-0.0888003	0.933509	4	-5936.98	5568.98	Two Sample t-test	two.sided	C1 vs P1	0.95556
94	OTU3317_Cystobasidiaceae	2	6	-0.699854	0.522582	4	-19.8687	11.8687	Two Sample t-test	two.sided	C1 vs P1	0.629034
95	OTU3360_Lophiostomataceae	44	93	-0.727037	0.507471	4	-236.124	138.124	Two Sample t-test	two.sided	C1 vs P1	0.62237
96	OTU3381_unidentified_fungus	38.6667	70.6667	-1.41207	0.230784	4	-94.9191	30.9191	Two Sample t-test	two.sided	C1 vs P1	0.357125
97	OTU3409_Eremomycetaceae	32.3333	18	1.38494	0.238307	4	-14.4013	43.068	Two Sample t-test	two.sided	C1 vs P1	0.357125
98	OTU340_unidentified_fungus	5.66667	1	3.5	0.0248962	4	0.96474	8.36859	Two Sample t-test	two.sided	C1 vs P1	0.0951912
99	OTU3436_Hyponectriaceae	11	0.333333	4	0.0161301	4	3.26281	18.0705	Two Sample t-test	two.sided	C1 vs P1	0.0676423
100	OTU3437_unidentified_fungus	10.6667	1.33333	1.37281	0.241746	4	-9.54286	28.2095	Two Sample t-test	two.sided	C1 vs P1	0.357125
101	OTU371_Herpotrichiellaceae	1.66667	22	-1.61198	0.182261	4	-55.3552	14.6885	Two Sample t-test	two.sided	C1 vs P1	0.324574
102	OTU387_Pluteaceae	12.3333	0	6.99234	0.00220114	4	7.43614	17.2305	Two Sample t-test	two.sided	C1 vs P1	0.0286148	.
103	OTU38_Archaeosporaceae	6.66667	5	0.552158	0.610239	4	-6.71393	10.0473	Two Sample t-test	two.sided	C1 vs P1	0.697956
104	OTU391_Bolbitiaceae	84	1.33333	4.03159	0.0157129	4	25.7364	139.597	Two Sample t-test	two.sided	C1 vs P1	0.0676423
105	OTU432_Spizellomycetaceae	219.667	131.667	0.736248	0.502424	4	-243.855	419.855	Two Sample t-test	two.sided	C1 vs P1	0.622049
106	OTU46_Amanitaceae	18.3333	0.666667	9.84185	0.000597763	4	12.6828	22.6505	Two Sample t-test	two.sided	C1 vs P1	0.0129515	.
107	OTU496_Strophariaceae	8	0	1.92154	0.127046	4	-3.55926	19.5593	Two Sample t-test	two.sided	C1 vs P1	0.247136
108	OTU507_Piptocephalidaceae	101	628.333	-15.8677	9.21904e-05	4	-619.603	-435.063	Two Sample t-test	two.sided	C1 vs P1	0.00399492	*
109	OTU509_Psathyrellaceae	73	2.66667	6.28801	0.00326741	4	39.2779	101.389	Two Sample t-test	two.sided	C1 vs P1	0.0333066	.
110	OTU545_Pucciniastraceae	6.33333	1.33333	1.12115	0.324981	4	-7.3821	17.3821	Two Sample t-test	two.sided	C1 vs P1	0.440078
111	OTU597_Lyophyllaceae	9.33333	9	0.0477274	0.964221	4	-19.0577	19.7243	Two Sample t-test	two.sided	C1 vs P1	0.978946
112	OTU675_Rhizophydiaceae	16	56.3333	-1.62012	0.180522	4	-109.454	28.7872	Two Sample t-test	two.sided	C1 vs P1	0.324574
113	OTU679_Mucoraceae	0	3	-1.96396	0.121004	4	-7.24109	1.24109	Two Sample t-test	two.sided	C1 vs P1	0.245789
114	OTU697_Incertae_sedis	252.333	391	-0.578852	0.593721	4	-803.777	526.444	Two Sample t-test	two.sided	C1 vs P1	0.68914
115	OTU701_Pyronemataceae	2846.33	1248.67	1.47482	0.214283	4	-1410.05	4605.38	Two Sample t-test	two.sided	C1 vs P1	0.349151
116	OTU732_Erysiphaceae	23	14.6667	0.938895	0.400943	4	-16.3095	32.9762	Two Sample t-test	two.sided	C1 vs P1	0.516065
117	OTU735_Onygenaceae	30	12.6667	2.09514	0.104224	4	-5.63652	40.3032	Two Sample t-test	two.sided	C1 vs P1	0.225354
118	OTU750_unidentified_fungus	122.333	9.66667	3.34146	0.0287966	4	19.0511	206.282	Two Sample t-test	two.sided	C1 vs P1	0.101177
119	OTU787_Clavicipitaceae	262.667	403.667	-1.1417	0.317283	4	-483.891	201.891	Two Sample t-test	two.sided	C1 vs P1	0.438795
120	OTU791_Ascobolaceae	72	3.33333	1.58462	0.188231	4	-51.646	188.979	Two Sample t-test	two.sided	C1 vs P1	0.330501
121	OTU801_Gymnoascaceae	1.33333	0.333333	1.06066	0.348641	4	-1.61766	3.61766	Two Sample t-test	two.sided	C1 vs P1	0.462483
122	OTU812_Atheliaceae	10.6667	2.33333	1.08593	0.338574	4	-12.9729	29.6395	Two Sample t-test	two.sided	C1 vs P1	0.453759
123	OTU831_Thelephoraceae	12.6667	44.3333	-0.774768	0.481727	4	-145.147	81.8134	Two Sample t-test	two.sided	C1 vs P1	0.602158
124	OTU864_Didymosphaeriaceae	52	174.333	-1.47919	0.213179	4	-351.954	107.287	Two Sample t-test	two.sided	C1 vs P1	0.349151
125	OTU866_Coniochaetaceae	289.667	189	1.15262	0.31326	4	-141.82	343.153	Two Sample t-test	two.sided	C1 vs P1	0.438795
126	OTU871_Incertae_sedis	18.6667	3	2.24319	0.0883093	4	-3.72433	35.0577	Two Sample t-test	two.sided	C1 vs P1	0.208731
127	OTU897_Sebacinaceae	463	14.3333	3.2353	0.0318154	4	63.6329	833.7	Two Sample t-test	two.sided	C1 vs P1	0.1034
128	OTU936_Sporocadaceae	46.3333	64	-2.77795	0.0499228	4	-35.3237	-0.00960116	Two Sample t-test	two.sided	C1 vs P1	0.147499
129	OTU965_Massarinaceae	71	4.66667	17.0641	6.91733e-05	4	55.5405	77.1262	Two Sample t-test	two.sided	C1 vs P1	0.00399492	*
130	OTU968_Hydnodontaceae	249	11.3333	8.55135	0.00102665	4	160.501	314.832	Two Sample t-test	two.sided	C1 vs P1	0.0152698	.
131	OTU1003_unidentified_fungus	111.333	6.66667	3.98011	0.0163996	4	31.6533	177.68	Two Sample t-test	two.sided	C1 vs P2	0.0380894	.
132	OTU1054_unidentified_fungus	81	174.333	-1.10612	0.330719	4	-327.606	140.94	Two Sample t-test	two.sided	C1 vs P2	0.358279
133	OTU1057_Incertae_sedis	7.33333	3.33333	0.945732	0.397836	4	-7.74305	15.743	Two Sample t-test	two.sided	C1 vs P2	0.407234
134	OTU1059_Sordariaceae	6	0.666667	1.62455	0.179582	4	-3.7816	14.4483	Two Sample t-test	two.sided	C1 vs P2	0.226657
135	OTU1084_Gigasporaceae	13	1	2.85499	0.0461626	4	0.33012	23.6699	Two Sample t-test	two.sided	C1 vs P2	0.0833492
136	OTU1096_Hypocreaceae	118	5.66667	4.50738	0.0107616	4	43.1385	181.528	Two Sample t-test	two.sided	C1 vs P2	0.0336702	.
137	OTU1104_unidentified_fungus	97.3333	5.66667	9.87192	0.00059075	4	65.8857	117.448	Two Sample t-test	two.sided	C1 vs P2	0.00778055	*
138	OTU1113_unidentified_fungus	48	18.3333	2.78125	0.0497549	4	0.0512522	59.2821	Two Sample t-test	two.sided	C1 vs P2	0.0862418
139	OTU1130_Serendipitaceae	234.333	8	2.98954	0.0403566	4	16.1328	436.534	Two Sample t-test	two.sided	C1 vs P2	0.0752988
140	OTU1140_Incertae_sedis	44.3333	3.66667	5.32959	0.00596689	4	19.4814	61.8519	Two Sample t-test	two.sided	C1 vs P2	0.0243741	.
141	OTU1174_Helvellaceae	45.6667	1.66667	2.43735	0.0714122	4	-6.12148	94.1215	Two Sample t-test	two.sided	C1 vs P2	0.110519
142	OTU1234_Pleosporaceae	98.3333	5	2.63659	0.0577864	4	-4.95091	191.618	Two Sample t-test	two.sided	C1 vs P2	0.0950915
143	OTU1260_unidentified_fungus	157.667	5.33333	5.8465	0.00426855	4	79.9917	224.675	Two Sample t-test	two.sided	C1 vs P2	0.0198183	.
144	OTU1262_Apiosporaceae	54.3333	4.33333	3.95835	0.0167007	4	14.9292	85.0708	Two Sample t-test	two.sided	C1 vs P2	0.0380894	.
145	OTU1268_unidentified_fungus	15.3333	0.666667	9.8387	0.000598504	4	10.5278	18.8055	Two Sample t-test	two.sided	C1 vs P2	0.00778055	*
146	OTU1287_Ceratobasidiaceae	72.6667	5	3.32252	0.0293096	4	11.1213	124.212	Two Sample t-test	two.sided	C1 vs P2	0.057731
147	OTU1291_Herpotrichiellaceae	117.667	8.66667	4.9671	0.00766726	4	48.0726	169.927	Two Sample t-test	two.sided	C1 vs P2	0.026939	.
148	OTU1341_Trapeliaceae	37	0.666667	1.89802	0.130536	4	-16.8154	89.4821	Two Sample t-test	two.sided	C1 vs P2	0.180327
149	OTU1379_Incertae_sedis	51	34	0.965016	0.389184	4	-31.9106	65.9106	Two Sample t-test	two.sided	C1 vs P2	0.401539
150	OTU1448_unidentified_fungus	350.667	10.3333	5.77315	0.00446956	4	176.659	504.008	Two Sample t-test	two.sided	C1 vs P2	0.0200359	.
151	OTU151_Entolomataceae	998.667	25.6667	8.65369	0.000980935	4	660.823	1285.18	Two Sample t-test	two.sided	C1 vs P2	0.00850144	*
152	OTU1545_Helotiaceae	370.667	11.6667	4.20402	0.0136516	4	121.907	596.093	Two Sample t-test	two.sided	C1 vs P2	0.0354943	.
153	OTU1585_unidentified_fungus	14.3333	3	1.50851	0.20592	4	-9.52596	32.1926	Two Sample t-test	two.sided	C1 vs P2	0.245326
154	OTU1594_Tricholomataceae	18.3333	0	2.82516	0.0475781	4	0.316127	36.3505	Two Sample t-test	two.sided	C1 vs P2	0.0835832
155	OTU1598_Fomitopsidaceae	0.666667	0.333333	0.447214	0.677869	4	-1.73611	2.40277	Two Sample t-test	two.sided	C1 vs P2	0.683124
156	OTU1649_Lasiosphaeriaceae	754.667	38.6667	3.40464	0.027161	4	132.111	1299.89	Two Sample t-test	two.sided	C1 vs P2	0.0551707
157	OTU1653_unidentified_fungus	60	3.33333	10.5633	0.000454405	4	41.7724	71.5609	Two Sample t-test	two.sided	C1 vs P2	0.00738408	*
158	OTU1654_Piskurozymaceae	2291.33	185.333	9.14697	0.000792878	4	1466.75	2745.25	Two Sample t-test	two.sided	C1 vs P2	0.00792878	*
159	OTU1725_Phaeosphaeriaceae	201	8.33333	7.51791	0.0016757	4	121.513	263.821	Two Sample t-test	two.sided	C1 vs P2	0.0125472	.
160	OTU1733_Hoehnelomycetaceae	29	1.33333	1.40016	0.234057	4	-27.195	82.5283	Two Sample t-test	two.sided	C1 vs P2	0.264586
161	OTU1740_Schizoporaceae	1.66667	9.33333	-2.48015	0.0681999	4	-16.2492	0.915898	Two Sample t-test	two.sided	C1 vs P2	0.108122
162	OTU1743_unidentified_fungus	1	0	1.73205	0.158302	4	-0.602981	2.60298	Two Sample t-test	two.sided	C1 vs P2	0.206108
163	OTU1765_unidentified_fungus	5.66667	1	2.40098	0.0742773	4	-0.729773	10.0631	Two Sample t-test	two.sided	C1 vs P2	0.113601
164	OTU1779_Mortierellaceae	17531	9859.67	4.34086	0.0122446	4	2764.7	12578	Two Sample t-test	two.sided	C1 vs P2	0.0338681	.
165	OTU1805_Thelebolaceae	178	12	4.34939	0.0121629	4	60.0334	271.967	Two Sample t-test	two.sided	C1 vs P2	0.0338681	.
166	OTU1813_Cordycipitaceae	5.66667	2	1.05361	0.351498	4	-5.99565	13.329	Two Sample t-test	two.sided	C1 vs P2	0.371502
167	OTU1816_Pseudeurotiaceae	7350.33	2108.33	5.07584	0.00710135	4	2374.67	8109.33	Two Sample t-test	two.sided	C1 vs P2	0.0256717	.
168	OTU1822_Verrucariaceae	6.66667	0	1.27257	0.272111	4	-7.87842	21.2118	Two Sample t-test	two.sided	C1 vs P2	0.302345
169	OTU1823_Chaetomiaceae	304.333	99	2.30448	0.0825311	4	-42.0526	452.719	Two Sample t-test	two.sided	C1 vs P2	0.121921
170	OTU1843_Myrmecridiaceae	20.3333	4	2.22727	0.0898828	4	-4.02726	36.6939	Two Sample t-test	two.sided	C1 vs P2	0.129831
171	OTU1868_unidentified_fungus	210.333	7.33333	8.15779	0.00122902	4	133.91	272.09	Two Sample t-test	two.sided	C1 vs P2	0.00998582	*
172	OTU1897_Pleurotheciaceae	15.3333	0.333333	1.21577	0.290915	4	-19.2553	49.2553	Two Sample t-test	two.sided	C1 vs P2	0.320499
173	OTU1899_Aspergillaceae	26	2.33333	4.09237	0.0149461	4	7.61016	39.7232	Two Sample t-test	two.sided	C1 vs P2	0.0376972	.
174	OTU1938_Ascodesmidaceae	18	4	1.40234	0.233454	4	-13.7181	41.7181	Two Sample t-test	two.sided	C1 vs P2	0.264586
175	OTU1984_Myxotrichaceae	4.33333	1	2.5	0.0667665	4	-0.368593	7.03526	Two Sample t-test	two.sided	C1 vs P2	0.107156
176	OTU2113_Chrysozymaceae	10.3333	0	1.5002	0.207952	4	-8.7908	29.4575	Two Sample t-test	two.sided	C1 vs P2	0.245326
177	OTU2147_Rhizopogonaceae	4.33333	9	-1.75	0.155016	4	-12.0705	2.73719	Two Sample t-test	two.sided	C1 vs P2	0.206108
178	OTU2164_Stachybotryaceae	11	0.666667	3.96914	0.0165505	4	3.10509	17.5616	Two Sample t-test	two.sided	C1 vs P2	0.0380894	.
179	OTU2270_Arthopyreniaceae	20.6667	0.666667	2.04242	0.110638	4	-7.18775	47.1877	Two Sample t-test	two.sided	C1 vs P2	0.156337
180	OTU2276_Cephalothecaceae	0.666667	0	1	0.373901	4	-1.1843	2.51763	Two Sample t-test	two.sided	C1 vs P2	0.388857
181	OTU2383_Incertae_sedis	279.667	11	4.05841	0.0153689	4	84.8659	452.467	Two Sample t-test	two.sided	C1 vs P2	0.0376972	.
182	OTU240_Orbiliaceae	37	1.66667	1.73074	0.158545	4	-21.3482	92.0148	Two Sample t-test	two.sided	C1 vs P2	0.206108
183	OTU2418_Halomycetaceae	98	2.33333	3.79908	0.0191189	4	25.7514	165.582	Two Sample t-test	two.sided	C1 vs P2	0.0421263	.
184	OTU2419_Ophiocordycipitaceae	54.3333	0.333333	7.077	0.00210401	4	32.8148	75.1852	Two Sample t-test	two.sided	C1 vs P2	0.0125472	.
185	OTU2421_unidentified_fungus	113.333	3.66667	9.20662	0.000773287	4	76.5945	142.739	Two Sample t-test	two.sided	C1 vs P2	0.00792878	*
186	OTU2426_unidentified_fungus	11.6667	11.3333	0.116248	0.913059	4	-7.62796	8.29463	Two Sample t-test	two.sided	C1 vs P2	0.913059
187	OTU2500_Dermateaceae	9.33333	1	1.49404	0.209471	4	-7.15294	23.8196	Two Sample t-test	two.sided	C1 vs P2	0.245326
188	OTU2529_Incertae_sedis	985.667	26.6667	3.90043	0.0175351	4	276.355	1641.65	Two Sample t-test	two.sided	C1 vs P2	0.0393028	.
189	OTU2572_Saccharomycodaceae	21	2.66667	3.5878	0.0230068	4	4.14597	32.5207	Two Sample t-test	two.sided	C1 vs P2	0.0482401	.
190	OTU2573_Melanommataceae	388.333	13.6667	13.1789	0.000191489	4	295.734	453.599	Two Sample t-test	two.sided	C1 vs P2	0.00414893	*
191	OTU2628_Cladosporiaceae	4	0	1.73205	0.158302	4	-2.41193	10.4119	Two Sample t-test	two.sided	C1 vs P2	0.206108
192	OTU2631_unidentified_fungus	146	6.66667	6.76574	0.0024897	4	82.1553	196.511	Two Sample t-test	two.sided	C1 vs P2	0.0134859	.
193	OTU2682_Leptosphaeriaceae	35	1.66667	2.76079	0.0508085	4	-0.18904	66.8557	Two Sample t-test	two.sided	C1 vs P2	0.0868229
194	OTU2683_Microascaceae	155	17	3.33687	0.02892	4	23.1768	252.823	Two Sample t-test	two.sided	C1 vs P2	0.057731
195	OTU272_Kickxellaceae	4	0.666667	1.64399	0.175523	4	-2.29615	8.96282	Two Sample t-test	two.sided	C1 vs P2	0.223706
196	OTU2738_unidentified_fungus	893.667	22.3333	3.7451	0.0200322	4	225.366	1517.3	Two Sample t-test	two.sided	C1 vs P2	0.043403	.
197	OTU2739_Bionectriaceae	306.333	10	17.7907	5.86528e-05	4	250.087	342.58	Two Sample t-test	two.sided	C1 vs P2	0.00233751	*
198	OTU2740_Tremellaceae	131	8.66667	9.56885	0.0006664	4	86.8378	157.829	Two Sample t-test	two.sided	C1 vs P2	0.00787564	*
199	OTU2745_Lipomycetaceae	12	0	1.54491	0.197256	4	-9.56591	33.5659	Two Sample t-test	two.sided	C1 vs P2	0.241918
200	OTU2806_Mycosphaerellaceae	156	15.3333	4.43768	0.0113543	4	52.6583	228.675	Two Sample t-test	two.sided	C1 vs P2	0.0338681	.
201	OTU2807_Hyaloscyphaceae	107	6	7.17172	0.00200153	4	61.8991	140.101	Two Sample t-test	two.sided	C1 vs P2	0.0125472	.
202	OTU2840_Phomatosporaceae	14.3333	0.333333	2.88457	0.0448066	4	0.524783	27.4752	Two Sample t-test	two.sided	C1 vs P2	0.0820403
203	OTU2889_Lentitheciaceae	20.3333	0	2.37263	0.0766016	4	-3.46073	44.1274	Two Sample t-test	two.sided	C1 vs P2	0.115793
204	OTU2914_Nectriaceae	2268	82.6667	4.39592	0.0117284	4	805.086	3565.58	Two Sample t-test	two.sided	C1 vs P2	0.0338681	.
205	OTU2943_unidentified_fungus	205.333	14.3333	4.49332	0.0108781	4	72.9802	309.02	Two Sample t-test	two.sided	C1 vs P2	0.0336702	.
206	OTU2945_Reticulascaceae	14	0	1.99323	0.117018	4	-5.50111	33.5011	Two Sample t-test	two.sided	C1 vs P2	0.163573
207	OTU2946_unidentified_fungus	26.6667	0.666667	6.97653	0.00221989	4	15.6528	36.3472	Two Sample t-test	two.sided	C1 vs P2	0.0125472	.
208	OTU2950_Mrakiaceae	29.6667	6.33333	1.11125	0.328751	4	-34.9647	81.6313	Two Sample t-test	two.sided	C1 vs P2	0.358279
209	OTU2956_unidentified_fungus	1117.33	19.3333	22.5278	2.29926e-05	4	962.677	1233.32	Two Sample t-test	two.sided	C1 vs P2	0.00149452	*
210	OTU2982_unidentified_fungus	2064.33	205.667	7.08922	0.00209044	4	1130.73	2586.6	Two Sample t-test	two.sided	C1 vs P2	0.0125472	.
211	OTU298_Glomeraceae	23.3333	0.666667	4.63756	0.0097518	4	9.09644	36.2369	Two Sample t-test	two.sided	C1 vs P2	0.0325036	.
212	OTU2993_unidentified_fungus	6.33333	0	2.17945	0.0948028	4	-1.73483	14.4015	Two Sample t-test	two.sided	C1 vs P2	0.135433
213	OTU303_Meruliaceae	24.6667	0	6.6454	0.00266191	4	14.3609	34.9724	Two Sample t-test	two.sided	C1 vs P2	0.0138419	.
214	OTU3052_Chaetosphaeriaceae	87.3333	15	2.22966	0.0896446	4	-17.7384	162.405	Two Sample t-test	two.sided	C1 vs P2	0.129831
215	OTU3055_Periconiaceae	31	5.33333	2.72919	0.0524866	4	-0.444385	51.7777	Two Sample t-test	two.sided	C1 vs P2	0.0874777
216	OTU3057_Teratosphaeriaceae	23	1	3.6006	0.0227461	4	5.03564	38.9644	Two Sample t-test	two.sided	C1 vs P2	0.0482401	.
217	OTU3067_unidentified_fungus	702.333	14	5.19533	0.00653705	4	320.48	1056.19	Two Sample t-test	two.sided	C1 vs P2	0.0256717	.
218	OTU3128_Diversisporaceae	15.3333	5.66667	0.923548	0.40799	4	-19.394	38.7274	Two Sample t-test	two.sided	C1 vs P2	0.414365
219	OTU3136_Plectosphaerellaceae	80.6667	10	1.53042	0.20066	4	-57.5351	198.868	Two Sample t-test	two.sided	C1 vs P2	0.243792
220	OTU3188_unidentified_fungus	96.6667	1	4.60395	0.0100011	4	37.9742	153.359	Two Sample t-test	two.sided	C1 vs P2	0.0325036	.
221	OTU3258_Filobasidiaceae	96.6667	3.33333	5.12576	0.00685863	4	42.778	143.889	Two Sample t-test	two.sided	C1 vs P2	0.0256717	.
222	OTU3259_Trichocomaceae	30	3.33333	2.45718	0.0699031	4	-3.46483	56.7982	Two Sample t-test	two.sided	C1 vs P2	0.109487
223	OTU3261_unidentified_fungus	10738.3	6930	1.07175	0.344192	4	-6057.45	13674.1	Two Sample t-test	two.sided	C1 vs P2	0.369211
224	OTU3317_Cystobasidiaceae	2	0.333333	1.066	0.34649	4	-2.67423	6.00756	Two Sample t-test	two.sided	C1 vs P2	0.369211
225	OTU3360_Lophiostomataceae	44	8	5.07428	0.00710909	4	16.3022	55.6978	Two Sample t-test	two.sided	C1 vs P2	0.0256717	.
226	OTU3381_unidentified_fungus	38.6667	2.33333	2.30614	0.0823813	4	-7.40975	80.0764	Two Sample t-test	two.sided	C1 vs P2	0.121921
227	OTU3409_Eremomycetaceae	32.3333	3.33333	3.28594	0.0303308	4	4.49657	53.5034	Two Sample t-test	two.sided	C1 vs P2	0.0588508
228	OTU340_unidentified_fungus	5.66667	0.333333	4.27618	0.0128867	4	1.8705	8.79617	Two Sample t-test	two.sided	C1 vs P2	0.0349014	.
229	OTU3436_Hyponectriaceae	11	1.66667	2.98481	0.0405455	4	0.651545	18.0151	Two Sample t-test	two.sided	C1 vs P2	0.0752988
230	OTU3437_unidentified_fungus	10.6667	0	1.6	0.184849	4	-7.84297	29.1763	Two Sample t-test	two.sided	C1 vs P2	0.231008
231	OTU371_Herpotrichiellaceae	1.66667	0	1.88982	0.131778	4	-0.781928	4.11526	Two Sample t-test	two.sided	C1 vs P2	0.180327
232	OTU387_Pluteaceae	12.3333	0	6.99234	0.00220114	4	7.43614	17.2305	Two Sample t-test	two.sided	C1 vs P2	0.0125472	.
233	OTU38_Archaeosporaceae	6.66667	0.333333	4.24853	0.0131735	4	2.19445	10.4722	Two Sample t-test	two.sided	C1 vs P2	0.0349502	.
234	OTU391_Bolbitiaceae	84	1.33333	4.02999	0.0157337	4	25.7138	139.62	Two Sample t-test	two.sided	C1 vs P2	0.0378774	.
235	OTU432_Spizellomycetaceae	219.667	12.3333	4.60602	0.00998553	4	82.3556	332.311	Two Sample t-test	two.sided	C1 vs P2	0.0325036	.
236	OTU46_Amanitaceae	18.3333	0.333333	10.5903	0.000449923	4	13.281	22.719	Two Sample t-test	two.sided	C1 vs P2	0.00738408	*
237	OTU496_Strophariaceae	8	0.333333	1.8356	0.140313	4	-3.92959	19.2629	Two Sample t-test	two.sided	C1 vs P2	0.190007
238	OTU507_Piptocephalidaceae	101	11.6667	2.83761	0.0469813	4	1.92552	176.741	Two Sample t-test	two.sided	C1 vs P2	0.0835832
239	OTU509_Psathyrellaceae	73	2	6.43684	0.00299657	4	40.3751	101.625	Two Sample t-test	two.sided	C1 vs P2	0.0144279	.
240	OTU545_Pucciniastraceae	6.33333	0	1.44874	0.220993	4	-5.80425	18.4709	Two Sample t-test	two.sided	C1 vs P2	0.254239
241	OTU597_Lyophyllaceae	9.33333	1.33333	1.4799	0.212999	4	-7.00879	23.0088	Two Sample t-test	two.sided	C1 vs P2	0.247231
242	OTU675_Rhizophydiaceae	16	0.666667	2.74903	0.0514259	4	-0.152938	30.8196	Two Sample t-test	two.sided	C1 vs P2	0.0868229
243	OTU679_Mucoraceae	0	0.333333	-1	0.373901	4	-1.25882	0.592148	Two Sample t-test	two.sided	C1 vs P2	0.388857
244	OTU697_Incertae_sedis	252.333	10.6667	4.07664	0.0151402	4	77.0766	406.257	Two Sample t-test	two.sided	C1 vs P2	0.0376972	.
245	OTU701_Pyronemataceae	2846.33	39109.3	-15.9689	8.99042e-05	4	-42567.9	-29958.1	Two Sample t-test	two.sided	C1 vs P2	0.00233751	*
246	OTU732_Erysiphaceae	23	1	4.37096	0.0119591	4	8.02553	35.9745	Two Sample t-test	two.sided	C1 vs P2	0.0338681	.
247	OTU735_Onygenaceae	30	1.33333	16.2525	8.3867e-05	4	23.7695	33.5639	Two Sample t-test	two.sided	C1 vs P2	0.00233751	*
248	OTU750_unidentified_fungus	122.333	3	3.5566	0.023658	4	26.1763	212.49	Two Sample t-test	two.sided	C1 vs P2	0.048818	.
249	OTU787_Clavicipitaceae	262.667	12	6.50747	0.00287772	4	143.718	357.615	Two Sample t-test	two.sided	C1 vs P2	0.0143886	.
250	OTU791_Ascobolaceae	72	3	1.59207	0.186584	4	-51.3304	189.33	Two Sample t-test	two.sided	C1 vs P2	0.231008
251	OTU801_Gymnoascaceae	1.33333	0	1.51186	0.205106	4	-1.11526	3.78193	Two Sample t-test	two.sided	C1 vs P2	0.245326
252	OTU812_Atheliaceae	10.6667	0.666667	1.29944	0.263624	4	-11.3664	31.3664	Two Sample t-test	two.sided	C1 vs P2	0.295441
253	OTU831_Thelephoraceae	12.6667	2	1.65027	0.174232	4	-7.27909	28.6124	Two Sample t-test	two.sided	C1 vs P2	0.223706
254	OTU864_Didymosphaeriaceae	52	2.33333	5.32143	0.00599979	4	23.7532	75.5802	Two Sample t-test	two.sided	C1 vs P2	0.0243741	.
255	OTU866_Coniochaetaceae	289.667	15.3333	5.52337	0.00524721	4	136.433	412.233	Two Sample t-test	two.sided	C1 vs P2	0.0227379	.
256	OTU871_Incertae_sedis	18.6667	1	2.61112	0.0593499	4	-1.11856	36.4519	Two Sample t-test	two.sided	C1 vs P2	0.0964437
257	OTU897_Sebacinaceae	463	11.3333	3.25942	0.031098	4	66.9267	836.407	Two Sample t-test	two.sided	C1 vs P2	0.059452
258	OTU936_Sporocadaceae	46.3333	3.66667	7.02491	0.00216313	4	25.8036	59.5297	Two Sample t-test	two.sided	C1 vs P2	0.0125472	.
259	OTU965_Massarinaceae	71	0.333333	33.5201	4.72449e-06	4	64.8134	76.5199	Two Sample t-test	two.sided	C1 vs P2	0.000614184	**
260	OTU968_Hydnodontaceae	249	6.66667	8.83047	0.000907757	4	166.14	318.527	Two Sample t-test	two.sided	C1 vs P2	0.00842918	*
261	OTU1003_unidentified_fungus	111.333	1.33333	4.23321	0.0133358	4	37.854	182.146	Two Sample t-test	two.sided	C1 vs P3	0.0358397	.
262	OTU1054_unidentified_fungus	81	3.66667	2.80435	0.0485954	4	0.769647	153.897	Two Sample t-test	two.sided	C1 vs P3	0.0820442
263	OTU1057_Incertae_sedis	7.33333	19.6667	-1.58491	0.188166	4	-33.9389	9.27225	Two Sample t-test	two.sided	C1 vs P3	0.23077
264	OTU1059_Sordariaceae	6	0	1.86651	0.135376	4	-2.92502	14.925	Two Sample t-test	two.sided	C1 vs P3	0.189235
265	OTU1084_Gigasporaceae	13	1	2.85499	0.0461626	4	0.33012	23.6699	Two Sample t-test	two.sided	C1 vs P3	0.0800152
266	OTU1096_Hypocreaceae	118	13.3333	4.16745	0.0140602	4	34.9354	174.398	Two Sample t-test	two.sided	C1 vs P3	0.0358397	.
267	OTU1104_unidentified_fungus	97.3333	6	9.78571	0.000611133	4	65.4198	117.247	Two Sample t-test	two.sided	C1 vs P3	0.00896116	*
268	OTU1113_unidentified_fungus	48	1.33333	4.85363	0.00831755	4	19.9717	73.3616	Two Sample t-test	two.sided	C1 vs P3	0.0292238	.
269	OTU1130_Serendipitaceae	234.333	2.33333	3.06462	0.037489	4	21.8158	442.184	Two Sample t-test	two.sided	C1 vs P3	0.0696224
270	OTU1140_Incertae_sedis	44.3333	9.66667	4.18688	0.0138413	4	11.6782	57.6552	Two Sample t-test	two.sided	C1 vs P3	0.0358397	.
271	OTU1174_Helvellaceae	45.6667	1.66667	2.43238	0.0717963	4	-6.22391	94.2239	Two Sample t-test	two.sided	C1 vs P3	0.112452
272	OTU1234_Pleosporaceae	98.3333	3.66667	2.68595	0.0548885	4	-3.18962	192.523	Two Sample t-test	two.sided	C1 vs P3	0.0891938
273	OTU1260_unidentified_fungus	157.667	22	4.90041	0.0080416	4	58.8015	212.532	Two Sample t-test	two.sided	C1 vs P3	0.0290391	.
274	OTU1262_Apiosporaceae	54.3333	30.6667	1.66153	0.171943	4	-15.8808	63.2141	Two Sample t-test	two.sided	C1 vs P3	0.22082
275	OTU1268_unidentified_fungus	15.3333	1.66667	7.61351	0.00159751	4	8.6828	18.6505	Two Sample t-test	two.sided	C1 vs P3	0.011896	.
276	OTU1287_Ceratobasidiaceae	72.6667	0.666667	3.55054	0.0237871	4	15.6975	128.302	Two Sample t-test	two.sided	C1 vs P3	0.0498761	.
277	OTU1291_Herpotrichiellaceae	117.667	8	4.92363	0.00790883	4	47.8254	171.508	Two Sample t-test	two.sided	C1 vs P3	0.0290391	.
278	OTU1341_Trapeliaceae	37	0.333333	1.91543	0.127942	4	-16.4821	89.8154	Two Sample t-test	two.sided	C1 vs P3	0.180788
279	OTU1379_Incertae_sedis	51	114.333	-0.840091	0.448138	4	-272.646	145.979	Two Sample t-test	two.sided	C1 vs P3	0.473642
280	OTU1448_unidentified_fungus	350.667	7	5.84241	0.00427944	4	180.349	506.985	Two Sample t-test	two.sided	C1 vs P3	0.0191837	.
281	OTU151_Entolomataceae	998.667	19.6667	8.72386	0.000951044	4	667.425	1290.58	Two Sample t-test	two.sided	C1 vs P3	0.00951044	*
282	OTU1545_Helotiaceae	370.667	13	4.17785	0.0139425	4	119.975	595.359	Two Sample t-test	two.sided	C1 vs P3	0.0358397	.
283	OTU1585_unidentified_fungus	14.3333	4	1.25825	0.276739	4	-12.4681	33.1348	Two Sample t-test	two.sided	C1 vs P3	0.312835
284	OTU1594_Tricholomataceae	18.3333	0	2.82516	0.0475781	4	0.316127	36.3505	Two Sample t-test	two.sided	C1 vs P3	0.0813837
285	OTU1598_Fomitopsidaceae	0.666667	2.33333	-0.686803	0.529953	4	-8.40428	5.07094	Two Sample t-test	two.sided	C1 vs P3	0.546777
286	OTU1649_Lasiosphaeriaceae	754.667	15.3333	3.52236	0.0243981	4	156.565	1322.1	Two Sample t-test	two.sided	C1 vs P3	0.0499982	.
287	OTU1653_unidentified_fungus	60	2.33333	10.7497	0.000424539	4	42.7724	72.5609	Two Sample t-test	two.sided	C1 vs P3	0.00896116	*
288	OTU1654_Piskurozymaceae	2291.33	113.333	9.48537	0.00068932	4	1540.48	2815.52	Two Sample t-test	two.sided	C1 vs P3	0.00896116	*
289	OTU1725_Phaeosphaeriaceae	201	10.6667	7.39131	0.00178666	4	118.837	261.829	Two Sample t-test	two.sided	C1 vs P3	0.011962	.
290	OTU1733_Hoehnelomycetaceae	29	0.666667	1.4339	0.224904	4	-26.5283	83.195	Two Sample t-test	two.sided	C1 vs P3	0.263401
291	OTU1740_Schizoporaceae	1.66667	31	-2.33775	0.0795742	4	-64.1713	5.50463	Two Sample t-test	two.sided	C1 vs P3	0.12315
292	OTU1743_unidentified_fungus	1	0	1.73205	0.158302	4	-0.602981	2.60298	Two Sample t-test	two.sided	C1 vs P3	0.209993
293	OTU1765_unidentified_fungus	5.66667	0	3.4	0.0272773	4	1.03926	10.2941	Two Sample t-test	two.sided	C1 vs P3	0.0545547
294	OTU1779_Mortierellaceae	17531	50987	-8.83301	0.000906755	4	-43972.1	-22939.9	Two Sample t-test	two.sided	C1 vs P3	0.00951044	*
295	OTU1805_Thelebolaceae	178	4.33333	4.58005	0.010183	4	68.3893	278.944	Two Sample t-test	two.sided	C1 vs P3	0.0322877	.
296	OTU1813_Cordycipitaceae	5.66667	0	1.9897	0.117491	4	-2.24065	13.574	Two Sample t-test	two.sided	C1 vs P3	0.167844
297	OTU1816_Pseudeurotiaceae	7350.33	521	7.2457	0.00192575	4	4212.43	9446.23	Two Sample t-test	two.sided	C1 vs P3	0.011962	.
298	OTU1822_Verrucariaceae	6.66667	0	1.27257	0.272111	4	-7.87842	21.2118	Two Sample t-test	two.sided	C1 vs P3	0.310302
299	OTU1823_Chaetomiaceae	304.333	232.333	0.54134	0.617015	4	-297.276	441.276	Two Sample t-test	two.sided	C1 vs P3	0.626655
300	OTU1843_Myrmecridiaceae	20.3333	1.33333	2.69	0.0546583	4	-0.610606	38.6106	Two Sample t-test	two.sided	C1 vs P3	0.0891938
301	OTU1868_unidentified_fungus	210.333	5	8.27909	0.00116176	4	136.474	274.193	Two Sample t-test	two.sided	C1 vs P3	0.0107878	.
302	OTU1897_Pleurotheciaceae	15.3333	0	1.24324	0.28167	4	-18.9095	49.5762	Two Sample t-test	two.sided	C1 vs P3	0.315665
303	OTU1899_Aspergillaceae	26	4.66667	3.58331	0.0230993	4	4.8037	37.863	Two Sample t-test	two.sided	C1 vs P3	0.0492279	.
304	OTU1938_Ascodesmidaceae	18	1.66667	1.64898	0.174497	4	-11.1676	43.8343	Two Sample t-test	two.sided	C1 vs P3	0.22082
305	OTU1984_Myxotrichaceae	4.33333	6	-0.438529	0.683648	4	-12.2188	8.88545	Two Sample t-test	two.sided	C1 vs P3	0.685358
306	OTU2113_Chrysozymaceae	10.3333	0	1.5002	0.207952	4	-8.7908	29.4575	Two Sample t-test	two.sided	C1 vs P3	0.248016
307	OTU2147_Rhizopogonaceae	4.33333	8	-1.05361	0.351498	4	-13.329	5.99565	Two Sample t-test	two.sided	C1 vs P3	0.387243
308	OTU2164_Stachybotryaceae	11	0.666667	4.0705	0.0152167	4	3.28507	17.3816	Two Sample t-test	two.sided	C1 vs P3	0.037324	.
309	OTU2270_Arthopyreniaceae	20.6667	0	2.11541	0.101867	4	-6.458	47.7913	Two Sample t-test	two.sided	C1 vs P3	0.152215
310	OTU2276_Cephalothecaceae	0.666667	0	1	0.373901	4	-1.1843	2.51763	Two Sample t-test	two.sided	C1 vs P3	0.405059
311	OTU2383_Incertae_sedis	279.667	6.33333	4.12995	0.0144945	4	89.5792	457.087	Two Sample t-test	two.sided	C1 vs P3	0.0362363	.
312	OTU240_Orbiliaceae	37	0	1.81335	0.143986	4	-19.6513	93.6513	Two Sample t-test	two.sided	C1 vs P3	0.197033
313	OTU2418_Halomycetaceae	98	2	3.81365	0.0188809	4	26.1093	165.891	Two Sample t-test	two.sided	C1 vs P3	0.0425575	.
314	OTU2419_Ophiocordycipitaceae	54.3333	0	7.12749	0.0020486	4	33.1683	75.4984	Two Sample t-test	two.sided	C1 vs P3	0.011962	.
315	OTU2421_unidentified_fungus	113.333	1.33333	9.61965	0.000652915	4	79.6743	144.326	Two Sample t-test	two.sided	C1 vs P3	0.00896116	*
316	OTU2426_unidentified_fungus	11.6667	1	8	0.0013239	4	6.96474	14.3686	Two Sample t-test	two.sided	C1 vs P3	0.0114738	.
317	OTU2500_Dermateaceae	9.33333	0	1.70088	0.164186	4	-5.90202	24.5687	Two Sample t-test	two.sided	C1 vs P3	0.215597
318	OTU2529_Incertae_sedis	985.667	23	3.91512	0.0173188	4	279.982	1645.35	Two Sample t-test	two.sided	C1 vs P3	0.0402044	.
319	OTU2572_Saccharomycodaceae	21	2	3.96177	0.0166529	4	5.68464	32.3154	Two Sample t-test	two.sided	C1 vs P3	0.0393614	.
320	OTU2573_Melanommataceae	388.333	6	13.8283	0.00015852	4	305.569	459.098	Two Sample t-test	two.sided	C1 vs P3	0.00412151	*
321	OTU2628_Cladosporiaceae	4	0	1.73205	0.158302	4	-2.41193	10.4119	Two Sample t-test	two.sided	C1 vs P3	0.209993
322	OTU2631_unidentified_fungus	146	3.66667	6.94424	0.0022588	4	85.4256	199.241	Two Sample t-test	two.sided	C1 vs P3	0.0122351	.
323	OTU2682_Leptosphaeriaceae	35	0.333333	2.88444	0.0448125	4	1.29795	68.0354	Two Sample t-test	two.sided	C1 vs P3	0.0795813
324	OTU2683_Microascaceae	155	20.6667	3.20285	0.0328114	4	17.8843	250.782	Two Sample t-test	two.sided	C1 vs P3	0.0618186
325	OTU272_Kickxellaceae	4	0	2	0.116117	4	-1.55289	9.55289	Two Sample t-test	two.sided	C1 vs P3	0.167844
326	OTU2738_unidentified_fungus	893.667	12.3333	3.7889	0.0192872	4	235.506	1527.16	Two Sample t-test	two.sided	C1 vs P3	0.0425575	.
327	OTU2739_Bionectriaceae	306.333	17.6667	15.8373	9.28894e-05	4	238.061	339.273	Two Sample t-test	two.sided	C1 vs P3	0.00301891	*
328	OTU2740_Tremellaceae	131	7.66667	10.2033	0.000519858	4	89.7727	156.894	Two Sample t-test	two.sided	C1 vs P3	0.00896116	*
329	OTU2745_Lipomycetaceae	12	0	1.54491	0.197256	4	-9.56591	33.5659	Two Sample t-test	two.sided	C1 vs P3	0.239657
330	OTU2806_Mycosphaerellaceae	156	12	4.46239	0.0111398	4	54.405	233.595	Two Sample t-test	two.sided	C1 vs P3	0.0336783	.
331	OTU2807_Hyaloscyphaceae	107	1	7.55219	0.00164713	4	67.0307	144.969	Two Sample t-test	two.sided	C1 vs P3	0.011896	.
332	OTU2840_Phomatosporaceae	14.3333	0.333333	2.88457	0.0448066	4	0.524783	27.4752	Two Sample t-test	two.sided	C1 vs P3	0.0795813
333	OTU2889_Lentitheciaceae	20.3333	0.666667	2.2931	0.0835713	4	-4.14539	43.4787	Two Sample t-test	two.sided	C1 vs P3	0.127815
334	OTU2914_Nectriaceae	2268	152.667	4.23895	0.0132746	4	729.825	3500.84	Two Sample t-test	two.sided	C1 vs P3	0.0358397	.
335	OTU2943_unidentified_fungus	205.333	5.33333	4.73838	0.00904796	4	82.8105	317.19	Two Sample t-test	two.sided	C1 vs P3	0.0309536	.
336	OTU2945_Reticulascaceae	14	0	1.99323	0.117018	4	-5.50111	33.5011	Two Sample t-test	two.sided	C1 vs P3	0.167844
337	OTU2946_unidentified_fungus	26.6667	0.333333	7.06597	0.00211636	4	15.9861	36.6805	Two Sample t-test	two.sided	C1 vs P3	0.011962	.
338	OTU2950_Mrakiaceae	29.6667	4.66667	1.19198	0.299153	4	-33.2318	83.2318	Two Sample t-test	two.sided	C1 vs P3	0.332392
339	OTU2956_unidentified_fungus	1117.33	20	22.5845	2.27642e-05	4	962.432	1232.23	Two Sample t-test	two.sided	C1 vs P3	0.00147967	*
340	OTU2982_unidentified_fungus	2064.33	182.667	7.12133	0.00205526	4	1148.05	2615.29	Two Sample t-test	two.sided	C1 vs P3	0.011962	.
341	OTU298_Glomeraceae	23.3333	2	4.37495	0.0119218	4	7.7947	34.872	Two Sample t-test	two.sided	C1 vs P3	0.0344409	.
342	OTU2993_unidentified_fungus	6.33333	0	2.17945	0.0948028	4	-1.73483	14.4015	Two Sample t-test	two.sided	C1 vs P3	0.143307
343	OTU303_Meruliaceae	24.6667	0.333333	6.52932	0.00284213	4	13.9861	34.6805	Two Sample t-test	two.sided	C1 vs P3	0.0140311	.
344	OTU3052_Chaetosphaeriaceae	87.3333	7.66667	2.52448	0.065046	4	-7.95158	167.285	Two Sample t-test	two.sided	C1 vs P3	0.103122
345	OTU3055_Periconiaceae	31	8.66667	2.57692	0.061527	4	-1.72919	46.3959	Two Sample t-test	two.sided	C1 vs P3	0.098747
346	OTU3057_Teratosphaeriaceae	23	2.33333	3.36242	0.0282413	4	3.60163	37.7317	Two Sample t-test	two.sided	C1 vs P3	0.0556269
347	OTU3067_unidentified_fungus	702.333	14.6667	5.19162	0.00655376	4	319.907	1055.43	Two Sample t-test	two.sided	C1 vs P3	0.0266246	.
348	OTU3128_Diversisporaceae	15.3333	8	0.761341	0.488866	4	-19.4097	34.0764	Two Sample t-test	two.sided	C1 vs P3	0.508421
349	OTU3136_Plectosphaerellaceae	80.6667	3.66667	1.68273	0.167717	4	-50.0474	204.047	Two Sample t-test	two.sided	C1 vs P3	0.218032
350	OTU3188_unidentified_fungus	96.6667	2.66667	4.52491	0.0106185	4	36.3224	151.678	Two Sample t-test	two.sided	C1 vs P3	0.0328668	.
351	OTU3258_Filobasidiaceae	96.6667	5	4.9225	0.00791521	4	39.9638	143.37	Two Sample t-test	two.sided	C1 vs P3	0.0290391	.
352	OTU3259_Trichocomaceae	30	11.3333	1.51186	0.205106	4	-15.6137	52.947	Two Sample t-test	two.sided	C1 vs P3	0.246887
353	OTU3261_unidentified_fungus	10738.3	1567.67	15.8797	9.1915e-05	4	7567.25	10774.1	Two Sample t-test	two.sided	C1 vs P3	0.00301891	*
354	OTU3317_Cystobasidiaceae	2	0.666667	0.8	0.468527	4	-3.29408	5.96074	Two Sample t-test	two.sided	C1 vs P3	0.491198
355	OTU3360_Lophiostomataceae	44	63	-0.435966	0.685358	4	-140.001	102.001	Two Sample t-test	two.sided	C1 vs P3	0.685358
356	OTU3381_unidentified_fungus	38.6667	8	1.78213	0.149313	4	-17.1101	78.4434	Two Sample t-test	two.sided	C1 vs P3	0.202195
357	OTU3409_Eremomycetaceae	32.3333	1.66667	3.51258	0.0246145	4	6.42682	54.9065	Two Sample t-test	two.sided	C1 vs P3	0.0499982	.
358	OTU340_unidentified_fungus	5.66667	0.666667	3.63803	0.0220029	4	1.18414	8.81586	Two Sample t-test	two.sided	C1 vs P3	0.0476729	.
359	OTU3436_Hyponectriaceae	11	0.666667	3.78725	0.0193146	4	2.75794	17.9087	Two Sample t-test	two.sided	C1 vs P3	0.0425575	.
360	OTU3437_unidentified_fungus	10.6667	0	1.6	0.184849	4	-7.84297	29.1763	Two Sample t-test	two.sided	C1 vs P3	0.228861
361	OTU371_Herpotrichiellaceae	1.66667	0.666667	0.904534	0.416866	4	-2.06948	4.06948	Two Sample t-test	two.sided	C1 vs P3	0.444201
362	OTU387_Pluteaceae	12.3333	0.666667	6.18718	0.00346811	4	6.43135	16.902	Two Sample t-test	two.sided	C1 vs P3	0.016102	.
363	OTU38_Archaeosporaceae	6.66667	0	4.58831	0.0101197	4	2.63259	10.7007	Two Sample t-test	two.sided	C1 vs P3	0.0322877	.
364	OTU391_Bolbitiaceae	84	1.66667	4.01374	0.015947	4	25.3805	139.286	Two Sample t-test	two.sided	C1 vs P3	0.0383909	.
365	OTU432_Spizellomycetaceae	219.667	11.6667	4.59296	0.0100843	4	82.2639	333.736	Two Sample t-test	two.sided	C1 vs P3	0.0322877	.
366	OTU46_Amanitaceae	18.3333	2.33333	5.57989	0.00505759	4	8.03871	23.9613	Two Sample t-test	two.sided	C1 vs P3	0.0215116	.
367	OTU496_Strophariaceae	8	1	1.63485	0.17742	4	-4.88803	18.888	Two Sample t-test	two.sided	C1 vs P3	0.221775
368	OTU507_Piptocephalidaceae	101	8.33333	2.98907	0.040375	4	6.59189	178.741	Two Sample t-test	two.sided	C1 vs P3	0.0739261
369	OTU509_Psathyrellaceae	73	1.33333	6.48544	0.00291415	4	40.9859	102.347	Two Sample t-test	two.sided	C1 vs P3	0.0140311	.
370	OTU545_Pucciniastraceae	6.33333	0.333333	1.36851	0.242977	4	-6.17281	18.1728	Two Sample t-test	two.sided	C1 vs P3	0.282027
371	OTU597_Lyophyllaceae	9.33333	1.66667	1.44315	0.222458	4	-7.08308	22.4164	Two Sample t-test	two.sided	C1 vs P3	0.262904
372	OTU675_Rhizophydiaceae	16	0	2.87368	0.0453001	4	0.541408	31.4586	Two Sample t-test	two.sided	C1 vs P3	0.0795813
373	OTU679_Mucoraceae	0	13	-1	0.373901	4	-49.0938	23.0938	Two Sample t-test	two.sided	C1 vs P3	0.405059
374	OTU697_Incertae_sedis	252.333	6	4.18511	0.0138611	4	82.9131	409.754	Two Sample t-test	two.sided	C1 vs P3	0.0358397	.
375	OTU701_Pyronemataceae	2846.33	4823	-0.643578	0.554891	4	-10504.2	6550.83	Two Sample t-test	two.sided	C1 vs P3	0.567999
376	OTU732_Erysiphaceae	23	0.666667	4.39877	0.0117024	4	8.23682	36.4299	Two Sample t-test	two.sided	C1 vs P3	0.0344409	.
377	OTU735_Onygenaceae	30	21	0.961225	0.390872	4	-16.996	34.996	Two Sample t-test	two.sided	C1 vs P3	0.419945
378	OTU750_unidentified_fungus	122.333	11	3.30111	0.0299023	4	17.6949	204.972	Two Sample t-test	two.sided	C1 vs P3	0.0580193
379	OTU787_Clavicipitaceae	262.667	14	6.51733	0.00286158	4	142.732	354.601	Two Sample t-test	two.sided	C1 vs P3	0.0140311	.
380	OTU791_Ascobolaceae	72	0.666667	1.64674	0.174957	4	-48.9366	191.603	Two Sample t-test	two.sided	C1 vs P3	0.22082
381	OTU801_Gymnoascaceae	1.33333	32	-2.03942	0.111017	4	-72.416	11.0827	Two Sample t-test	two.sided	C1 vs P3	0.164003
382	OTU812_Atheliaceae	10.6667	0.333333	1.34655	0.249364	4	-10.9729	31.6395	Two Sample t-test	two.sided	C1 vs P3	0.286879
383	OTU831_Thelephoraceae	12.6667	1	1.81956	0.14295	4	-6.13533	29.4687	Two Sample t-test	two.sided	C1 vs P3	0.197033
384	OTU864_Didymosphaeriaceae	52	4.66667	5.07143	0.00712329	4	21.4198	73.2468	Two Sample t-test	two.sided	C1 vs P3	0.0280615	.
385	OTU866_Coniochaetaceae	289.667	13	5.55809	0.0051297	4	138.463	414.871	Two Sample t-test	two.sided	C1 vs P3	0.0215116	.
386	OTU871_Incertae_sedis	18.6667	0.333333	2.73635	0.0521008	4	-0.268619	36.9353	Two Sample t-test	two.sided	C1 vs P3	0.0868347
387	OTU897_Sebacinaceae	463	10.3333	3.2657	0.0309143	4	67.8165	837.517	Two Sample t-test	two.sided	C1 vs P3	0.0591008
388	OTU936_Sporocadaceae	46.3333	0.333333	7.86328	0.00141352	4	29.7579	62.2421	Two Sample t-test	two.sided	C1 vs P3	0.0114849	.
389	OTU965_Massarinaceae	71	1	32.4037	5.4078e-06	4	64.0022	75.9978	Two Sample t-test	two.sided	C1 vs P3	0.000703013	**
390	OTU968_Hydnodontaceae	249	6	8.82228	0.000910994	4	166.526	319.474	Two Sample t-test	two.sided	C1 vs P3	0.00951044	*
391	OTU1003_unidentified_fungus	111.333	5.66667	4.06243	0.015318	4	33.4494	177.884	Two Sample t-test	two.sided	C1 vs P4	0.0423689	.
392	OTU1054_unidentified_fungus	81	113	-0.401931	0.708285	4	-253.049	189.049	Two Sample t-test	two.sided	C1 vs P4	0.719352
393	OTU1057_Incertae_sedis	7.33333	120.667	-4.8912	0.00809505	4	-177.666	-49.0007	Two Sample t-test	two.sided	C1 vs P4	0.0292321	.
394	OTU1059_Sordariaceae	6	1.33333	1.34096	0.251018	4	-4.99565	14.329	Two Sample t-test	two.sided	C1 vs P4	0.29136
395	OTU1084_Gigasporaceae	13	2.33333	2.52982	0.0646769	4	-1.03985	22.3732	Two Sample t-test	two.sided	C1 vs P4	0.103802
396	OTU1096_Hypocreaceae	118	5.66667	4.52196	0.0106424	4	43.3617	181.305	Two Sample t-test	two.sided	C1 vs P4	0.0307446	.
397	OTU1104_unidentified_fungus	97.3333	14	8.9977	0.000844663	4	57.6189	109.048	Two Sample t-test	two.sided	C1 vs P4	0.00907419	*
398	OTU1113_unidentified_fungus	48	3	4.65794	0.0096043	4	18.177	71.823	Two Sample t-test	two.sided	C1 vs P4	0.0306063	.
399	OTU1130_Serendipitaceae	234.333	7	3.00187	0.0398683	4	17.0717	437.595	Two Sample t-test	two.sided	C1 vs P4	0.0729983
400	OTU1140_Incertae_sedis	44.3333	40	0.41612	0.698679	4	-24.5796	33.2463	Two Sample t-test	two.sided	C1 vs P4	0.719352
401	OTU1174_Helvellaceae	45.6667	4.33333	2.27917	0.0848647	4	-9.01831	91.685	Two Sample t-test	two.sided	C1 vs P4	0.131338
402	OTU1234_Pleosporaceae	98.3333	8.33333	2.5508	0.0632514	4	-7.96127	187.961	Two Sample t-test	two.sided	C1 vs P4	0.102784
403	OTU1260_unidentified_fungus	157.667	14.3333	5.30299	0.0060749	4	68.2894	218.377	Two Sample t-test	two.sided	C1 vs P4	0.0246793	.
404	OTU1262_Apiosporaceae	54.3333	13	3.47133	0.0255526	4	8.27407	74.3926	Two Sample t-test	two.sided	C1 vs P4	0.0544563
405	OTU1268_unidentified_fungus	15.3333	1.66667	6.40312	0.00305542	4	7.74069	19.5926	Two Sample t-test	two.sided	C1 vs P4	0.0172551	.
406	OTU1287_Ceratobasidiaceae	72.6667	0.666667	3.55054	0.0237871	4	15.6975	128.302	Two Sample t-test	two.sided	C1 vs P4	0.0524122
407	OTU1291_Herpotrichiellaceae	117.667	5.66667	5.09676	0.00699837	4	50.9884	173.012	Two Sample t-test	two.sided	C1 vs P4	0.0267585	.
408	OTU1341_Trapeliaceae	37	0	1.93314	0.125362	4	-16.1407	90.1407	Two Sample t-test	two.sided	C1 vs P4	0.183113
409	OTU1379_Incertae_sedis	51	122.333	-1.29816	0.264023	4	-223.898	81.2309	Two Sample t-test	two.sided	C1 vs P4	0.298461
410	OTU1448_unidentified_fungus	350.667	8.66667	5.80923	0.00436926	4	178.546	505.454	Two Sample t-test	two.sided	C1 vs P4	0.0196195	.
411	OTU151_Entolomataceae	998.667	23.3333	8.69371	0.000963744	4	663.849	1286.82	Two Sample t-test	two.sided	C1 vs P4	0.00907419	*
412	OTU1545_Helotiaceae	370.667	56.6667	3.62683	0.0222221	4	73.6241	554.376	Two Sample t-test	two.sided	C1 vs P4	0.0498082	.
413	OTU1585_unidentified_fungus	14.3333	22	-0.719805	0.511459	4	-37.2387	21.9053	Two Sample t-test	two.sided	C1 vs P4	0.544998
414	OTU1594_Tricholomataceae	18.3333	0	2.82516	0.0475781	4	0.316127	36.3505	Two Sample t-test	two.sided	C1 vs P4	0.0813837
415	OTU1598_Fomitopsidaceae	0.666667	0.666667	0	1	4	-2.61766	2.61766	Two Sample t-test	two.sided	C1 vs P4	1
416	OTU1649_Lasiosphaeriaceae	754.667	92.6667	3.09175	0.0365122	4	67.5129	1256.49	Two Sample t-test	two.sided	C1 vs P4	0.068791
417	OTU1653_unidentified_fungus	60	5.66667	9.58824	0.000661214	4	38.6001	70.0665	Two Sample t-test	two.sided	C1 vs P4	0.0086418	*
418	OTU1654_Piskurozymaceae	2291.33	164	9.34128	0.000731229	4	1495.04	2759.63	Two Sample t-test	two.sided	C1 vs P4	0.0086418	*
419	OTU1725_Phaeosphaeriaceae	201	14	7.31601	0.00185698	4	116.033	257.967	Two Sample t-test	two.sided	C1 vs P4	0.0134116	.
420	OTU1733_Hoehnelomycetaceae	29	2.66667	1.32759	0.255012	4	-28.7387	81.4053	Two Sample t-test	two.sided	C1 vs P4	0.293376
421	OTU1740_Schizoporaceae	1.66667	0	1.38675	0.237796	4	-1.67021	5.00354	Two Sample t-test	two.sided	C1 vs P4	0.284288
422	OTU1743_unidentified_fungus	1	0	1.73205	0.158302	4	-0.602981	2.60298	Two Sample t-test	two.sided	C1 vs P4	0.216624
423	OTU1765_unidentified_fungus	5.66667	1.66667	2.35339	0.0782249	4	-0.719049	8.71905	Two Sample t-test	two.sided	C1 vs P4	0.124015
424	OTU1779_Mortierellaceae	17531	48365.3	-15.2005	0.000109217	4	-36466.4	-25202.3	Two Sample t-test	two.sided	C1 vs P4	0.00283963	*
425	OTU1805_Thelebolaceae	178	40	3.51125	0.0246441	4	28.8795	247.121	Two Sample t-test	two.sided	C1 vs P4	0.0533955
426	OTU1813_Cordycipitaceae	5.66667	1.33333	1.378	0.240269	4	-4.39764	13.0643	Two Sample t-test	two.sided	C1 vs P4	0.284288
427	OTU1816_Pseudeurotiaceae	7350.33	1799.33	5.80654	0.00437665	4	2896.74	8205.26	Two Sample t-test	two.sided	C1 vs P4	0.0196195	.
428	OTU1822_Verrucariaceae	6.66667	0.333333	1.2065	0.294099	4	-8.24117	20.9078	Two Sample t-test	two.sided	C1 vs P4	0.324007
429	OTU1823_Chaetomiaceae	304.333	44	3.05323	0.0379084	4	23.5999	497.067	Two Sample t-test	two.sided	C1 vs P4	0.0704013
430	OTU1843_Myrmecridiaceae	20.3333	0.333333	2.83158	0.0472695	4	0.389394	39.6106	Two Sample t-test	two.sided	C1 vs P4	0.0813837
431	OTU1868_unidentified_fungus	210.333	3.66667	8.32084	0.00113968	4	137.707	275.626	Two Sample t-test	two.sided	C1 vs P4	0.00987719	*
432	OTU1897_Pleurotheciaceae	15.3333	0	1.24324	0.28167	4	-18.9095	49.5762	Two Sample t-test	two.sided	C1 vs P4	0.315665
433	OTU1899_Aspergillaceae	26	4.66667	3.42584	0.026637	4	4.04391	38.6228	Two Sample t-test	two.sided	C1 vs P4	0.0558518
434	OTU1938_Ascodesmidaceae	18	4.66667	1.22169	0.288898	4	-16.9682	43.6349	Two Sample t-test	two.sided	C1 vs P4	0.320998
435	OTU1984_Myxotrichaceae	4.33333	7.33333	-1.67126	0.16999	4	-7.98387	1.98387	Two Sample t-test	two.sided	C1 vs P4	0.226986
436	OTU2113_Chrysozymaceae	10.3333	0.666667	1.40177	0.233612	4	-9.47985	28.8132	Two Sample t-test	two.sided	C1 vs P4	0.284288
437	OTU2147_Rhizopogonaceae	4.33333	3.33333	0.424264	0.693197	4	-5.54414	7.54414	Two Sample t-test	two.sided	C1 vs P4	0.719352
438	OTU2164_Stachybotryaceae	11	1.66667	3.34664	0.0286582	4	1.5902	17.0765	Two Sample t-test	two.sided	C1 vs P4	0.0576482
439	OTU2270_Arthopyreniaceae	20.6667	2.66667	1.798	0.146579	4	-9.79528	45.7953	Two Sample t-test	two.sided	C1 vs P4	0.204895
440	OTU2276_Cephalothecaceae	0.666667	0.666667	0	1	4	-2.61766	2.61766	Two Sample t-test	two.sided	C1 vs P4	1
441	OTU2383_Incertae_sedis	279.667	26.3333	3.79299	0.0192193	4	67.8949	438.772	Two Sample t-test	two.sided	C1 vs P4	0.0462931	.
442	OTU240_Orbiliaceae	37	3	1.66565	0.171112	4	-22.6739	90.6739	Two Sample t-test	two.sided	C1 vs P4	0.226986
443	OTU2418_Halomycetaceae	98	4	3.72344	0.0204132	4	23.9074	164.093	Two Sample t-test	two.sided	C1 vs P4	0.0470385	.
444	OTU2419_Ophiocordycipitaceae	54.3333	3.33333	6.50035	0.00288943	4	29.2167	72.7833	Two Sample t-test	two.sided	C1 vs P4	0.0172551	.
445	OTU2421_unidentified_fungus	113.333	3	9.42259	0.000707202	4	77.8227	142.844	Two Sample t-test	two.sided	C1 vs P4	0.0086418	*
446	OTU2426_unidentified_fungus	11.6667	0.666667	9.94987	0.000573043	4	7.93052	14.0695	Two Sample t-test	two.sided	C1 vs P4	0.0086418	*
447	OTU2500_Dermateaceae	9.33333	1	1.49404	0.209471	4	-7.15294	23.8196	Two Sample t-test	two.sided	C1 vs P4	0.259345
448	OTU2529_Incertae_sedis	985.667	62	3.74887	0.0199667	4	239.591	1607.74	Two Sample t-test	two.sided	C1 vs P4	0.0470385	.
449	OTU2572_Saccharomycodaceae	21	0.666667	4.65121	0.00965275	4	8.19575	32.4709	Two Sample t-test	two.sided	C1 vs P4	0.0306063	.
450	OTU2573_Melanommataceae	388.333	21.3333	12.7065	0.000220967	4	286.808	447.192	Two Sample t-test	two.sided	C1 vs P4	0.00478762	*
451	OTU2628_Cladosporiaceae	4	0	1.73205	0.158302	4	-2.41193	10.4119	Two Sample t-test	two.sided	C1 vs P4	0.216624
452	OTU2631_unidentified_fungus	146	14	6.33134	0.00318555	4	74.1148	189.885	Two Sample t-test	two.sided	C1 vs P4	0.0172551	.
453	OTU2682_Leptosphaeriaceae	35	29.3333	0.402939	0.707601	4	-33.3794	44.7128	Two Sample t-test	two.sided	C1 vs P4	0.719352
454	OTU2683_Microascaceae	155	29.3333	2.98353	0.0405971	4	8.72225	242.611	Two Sample t-test	two.sided	C1 vs P4	0.0733003
455	OTU272_Kickxellaceae	4	0.333333	1.80839	0.144818	4	-1.96282	9.29615	Two Sample t-test	two.sided	C1 vs P4	0.204635
456	OTU2738_unidentified_fungus	893.667	30	3.71163	0.0206246	4	217.611	1509.72	Two Sample t-test	two.sided	C1 vs P4	0.0470385	.
457	OTU2739_Bionectriaceae	306.333	9.33333	18.1799	5.38365e-05	4	251.642	342.358	Two Sample t-test	two.sided	C1 vs P4	0.00233291	*
458	OTU2740_Tremellaceae	131	16.6667	7.48309	0.00170535	4	71.9123	156.754	Two Sample t-test	two.sided	C1 vs P4	0.0132691	.
459	OTU2745_Lipomycetaceae	12	0	1.54491	0.197256	4	-9.56591	33.5659	Two Sample t-test	two.sided	C1 vs P4	0.251405
460	OTU2806_Mycosphaerellaceae	156	10.6667	4.58262	0.0101633	4	57.2812	233.386	Two Sample t-test	two.sided	C1 vs P4	0.0307262	.
461	OTU2807_Hyaloscyphaceae	107	2.33333	7.44879	0.00173519	4	65.6535	143.68	Two Sample t-test	two.sided	C1 vs P4	0.0132691	.
462	OTU2840_Phomatosporaceae	14.3333	0.333333	2.88457	0.0448066	4	0.524783	27.4752	Two Sample t-test	two.sided	C1 vs P4	0.0797926
463	OTU2889_Lentitheciaceae	20.3333	0.666667	2.28792	0.0840493	4	-4.19928	43.5326	Two Sample t-test	two.sided	C1 vs P4	0.131338
464	OTU2914_Nectriaceae	2268	296.667	3.94011	0.0169582	4	582.21	3360.46	Two Sample t-test	two.sided	C1 vs P4	0.0436196	.
465	OTU2943_unidentified_fungus	205.333	18	4.36908	0.0119767	4	68.2875	306.379	Two Sample t-test	two.sided	C1 vs P4	0.0338472	.
466	OTU2945_Reticulascaceae	14	0	1.99323	0.117018	4	-5.50111	33.5011	Two Sample t-test	two.sided	C1 vs P4	0.173679
467	OTU2946_unidentified_fungus	26.6667	1.33333	6.42317	0.00302025	4	14.3829	36.2838	Two Sample t-test	two.sided	C1 vs P4	0.0172551	.
468	OTU2950_Mrakiaceae	29.6667	8	1.02315	0.364078	4	-37.1287	80.4621	Two Sample t-test	two.sided	C1 vs P4	0.394418
469	OTU2956_unidentified_fungus	1117.33	36	22.2867	2.39972e-05	4	946.622	1216.04	Two Sample t-test	two.sided	C1 vs P4	0.00155982	*
470	OTU2982_unidentified_fungus	2064.33	514.667	5.57056	0.00508829	4	777.291	2322.04	Two Sample t-test	two.sided	C1 vs P4	0.021338	.
471	OTU298_Glomeraceae	23.3333	0.333333	4.73894	0.00904426	4	9.52478	36.4752	Two Sample t-test	two.sided	C1 vs P4	0.0306063	.
472	OTU2993_unidentified_fungus	6.33333	0	2.17945	0.0948028	4	-1.73483	14.4015	Two Sample t-test	two.sided	C1 vs P4	0.143307
473	OTU303_Meruliaceae	24.6667	1.33333	5.91608	0.00408799	4	12.3829	34.2838	Two Sample t-test	two.sided	C1 vs P4	0.0196195	.
474	OTU3052_Chaetosphaeriaceae	87.3333	5.33333	2.61024	0.0594053	4	-5.22143	169.221	Two Sample t-test	two.sided	C1 vs P4	0.0977555
475	OTU3055_Periconiaceae	31	3.33333	3.24308	0.0315818	4	3.98084	51.3525	Two Sample t-test	two.sided	C1 vs P4	0.0612781
476	OTU3057_Teratosphaeriaceae	23	2	3.40665	0.0271108	4	3.88484	38.1152	Two Sample t-test	two.sided	C1 vs P4	0.055943
477	OTU3067_unidentified_fungus	702.333	22.6667	5.12533	0.00686069	4	311.484	1047.85	Two Sample t-test	two.sided	C1 vs P4	0.0267585	.
478	OTU3128_Diversisporaceae	15.3333	5	1.10293	0.33195	4	-15.6791	36.3458	Two Sample t-test	two.sided	C1 vs P4	0.362635
479	OTU3136_Plectosphaerellaceae	80.6667	6	1.63139	0.178143	4	-52.4077	201.741	Two Sample t-test	two.sided	C1 vs P4	0.233926
480	OTU3188_unidentified_fungus	96.6667	2.33333	4.54095	0.0104895	4	36.6557	152.011	Two Sample t-test	two.sided	C1 vs P4	0.0307446	.
481	OTU3258_Filobasidiaceae	96.6667	4.33333	5.04555	0.00725374	4	41.5245	143.142	Two Sample t-test	two.sided	C1 vs P4	0.0269425	.
482	OTU3259_Trichocomaceae	30	13	1.50065	0.207841	4	-14.4528	48.4528	Two Sample t-test	two.sided	C1 vs P4	0.259345
483	OTU3261_unidentified_fungus	10738.3	3205.33	15.2706	0.000107255	4	6163.37	8902.63	Two Sample t-test	two.sided	C1 vs P4	0.00283963	*
484	OTU3317_Cystobasidiaceae	2	0	1.30931	0.260575	4	-2.24109	6.24109	Two Sample t-test	two.sided	C1 vs P4	0.297146
485	OTU3360_Lophiostomataceae	44	22.3333	2.68513	0.0549353	4	-0.736873	44.0702	Two Sample t-test	two.sided	C1 vs P4	0.0915589
486	OTU3381_unidentified_fungus	38.6667	4.33333	2.18507	0.0942094	4	-9.29211	77.9588	Two Sample t-test	two.sided	C1 vs P4	0.143307
487	OTU3409_Eremomycetaceae	32.3333	3	3.34043	0.0288241	4	4.95255	53.7141	Two Sample t-test	two.sided	C1 vs P4	0.0576482
488	OTU340_unidentified_fungus	5.66667	0	4.71495	0.00920589	4	2.32979	9.00354	Two Sample t-test	two.sided	C1 vs P4	0.0306063	.
489	OTU3436_Hyponectriaceae	11	0.333333	4	0.0161301	4	3.26281	18.0705	Two Sample t-test	two.sided	C1 vs P4	0.0428082	.
490	OTU3437_unidentified_fungus	10.6667	0	1.6	0.184849	4	-7.84297	29.1763	Two Sample t-test	two.sided	C1 vs P4	0.240304
491	OTU371_Herpotrichiellaceae	1.66667	1	0.632456	0.561438	4	-2.25996	3.5933	Two Sample t-test	two.sided	C1 vs P4	0.59339
492	OTU387_Pluteaceae	12.3333	1	6.10658	0.00363955	4	6.18047	16.4862	Two Sample t-test	two.sided	C1 vs P4	0.0181978	.
493	OTU38_Archaeosporaceae	6.66667	0	4.58831	0.0101197	4	2.63259	10.7007	Two Sample t-test	two.sided	C1 vs P4	0.0307262	.
494	OTU391_Bolbitiaceae	84	2	3.9996	0.0161354	4	25.0772	138.923	Two Sample t-test	two.sided	C1 vs P4	0.0428082	.
495	OTU432_Spizellomycetaceae	219.667	5	4.78285	0.00875723	4	90.0527	339.281	Two Sample t-test	two.sided	C1 vs P4	0.0306063	.
496	OTU46_Amanitaceae	18.3333	0.666667	9.84185	0.000597763	4	12.6828	22.6505	Two Sample t-test	two.sided	C1 vs P4	0.0086418	*
497	OTU496_Strophariaceae	8	0.333333	1.8356	0.140313	4	-3.92959	19.2629	Two Sample t-test	two.sided	C1 vs P4	0.200447
498	OTU507_Piptocephalidaceae	101	11.3333	2.86462	0.0457158	4	2.76004	176.573	Two Sample t-test	two.sided	C1 vs P4	0.0803116
499	OTU509_Psathyrellaceae	73	3	6.21966	0.00340185	4	38.7521	101.248	Two Sample t-test	two.sided	C1 vs P4	0.0176896	.
500	OTU545_Pucciniastraceae	6.33333	0.333333	1.36851	0.242977	4	-6.17281	18.1728	Two Sample t-test	two.sided	C1 vs P4	0.284568
501	OTU597_Lyophyllaceae	9.33333	0.333333	1.7145	0.161587	4	-5.5745	23.5745	Two Sample t-test	two.sided	C1 vs P4	0.218815
502	OTU675_Rhizophydiaceae	16	3.66667	1.98913	0.117567	4	-4.88162	29.5483	Two Sample t-test	two.sided	C1 vs P4	0.173679
503	OTU679_Mucoraceae	0	0.333333	-1	0.373901	4	-1.25882	0.592148	Two Sample t-test	two.sided	C1 vs P4	0.401712
504	OTU697_Incertae_sedis	252.333	19.3333	3.84583	0.0183679	4	64.7888	401.211	Two Sample t-test	two.sided	C1 vs P4	0.0459196	.
505	OTU701_Pyronemataceae	2846.33	3625.67	-0.619041	0.569404	4	-4274.7	2716.04	Two Sample t-test	two.sided	C1 vs P4	0.596956
506	OTU732_Erysiphaceae	23	2.66667	3.92936	0.0171123	4	5.96599	34.7007	Two Sample t-test	two.sided	C1 vs P4	0.0436196	.
507	OTU735_Onygenaceae	30	45.6667	-1.377	0.240552	4	-47.2553	15.922	Two Sample t-test	two.sided	C1 vs P4	0.284288
508	OTU750_unidentified_fungus	122.333	15.3333	3.13324	0.0350756	4	12.1844	201.816	Two Sample t-test	two.sided	C1 vs P4	0.0670563
509	OTU787_Clavicipitaceae	262.667	18.3333	6.43081	0.00300698	4	138.845	349.822	Two Sample t-test	two.sided	C1 vs P4	0.0172551	.
510	OTU791_Ascobolaceae	72	3.66667	1.5765	0.190039	4	-52.0113	188.678	Two Sample t-test	two.sided	C1 vs P4	0.244605
511	OTU801_Gymnoascaceae	1.33333	0	1.51186	0.205106	4	-1.11526	3.78193	Two Sample t-test	two.sided	C1 vs P4	0.258872
512	OTU812_Atheliaceae	10.6667	0	1.3913	0.23652	4	-10.6194	31.9527	Two Sample t-test	two.sided	C1 vs P4	0.284288
513	OTU831_Thelephoraceae	12.6667	0.666667	1.87663	0.133801	4	-5.75382	29.7538	Two Sample t-test	two.sided	C1 vs P4	0.193269
514	OTU864_Didymosphaeriaceae	52	11.6667	3.79238	0.0192295	4	10.8048	69.8619	Two Sample t-test	two.sided	C1 vs P4	0.0462931	.
515	OTU866_Coniochaetaceae	289.667	11.3333	5.61225	0.0049528	4	140.639	416.028	Two Sample t-test	two.sided	C1 vs P4	0.021338	.
516	OTU871_Incertae_sedis	18.6667	0.666667	2.6866	0.0548512	4	-0.601952	36.602	Two Sample t-test	two.sided	C1 vs P4	0.0915589
517	OTU897_Sebacinaceae	463	11.6667	3.25676	0.0311761	4	66.5633	836.103	Two Sample t-test	two.sided	C1 vs P4	0.0612781
518	OTU936_Sporocadaceae	46.3333	4	6.42267	0.00302114	4	24.0331	60.6335	Two Sample t-test	two.sided	C1 vs P4	0.0172551	.
519	OTU965_Massarinaceae	71	5.66667	23.4265	1.96818e-05	4	57.5902	73.0765	Two Sample t-test	two.sided	C1 vs P4	0.00155982	*
520	OTU968_Hydnodontaceae	249	8.66667	8.66226	0.00097722	4	163.301	317.365	Two Sample t-test	two.sided	C1 vs P4	0.00907419	*

## Sheet: Library B
	Family	estimate1	estimate2	statistic	p.value	parameter	conf.low	conf.high	method	alternative	Compare	fdr.adjusted	sign
1	OTU102_unidentified_fungus	88.6667	98.6667	-0.331396	0.756981	4	-93.7804	73.7804	Two Sample t-test	two.sided	C1 vs P1	0.820822
2	OTU104_Amanitaceae	17	5	1.5	0.208	4	-10.2116	34.2116	Two Sample t-test	two.sided	C1 vs P1	0.367059
3	OTU1123_Corticiaceae	21.3333	1.33333	2.05677	0.10885	4	-6.99806	46.9981	Two Sample t-test	two.sided	C1 vs P1	0.240143
4	OTU1151_unidentified_fungus	15	0	9.81981	0.00060297	4	10.7589	19.2411	Two Sample t-test	two.sided	C1 vs P1	0.0167542	.
5	OTU1158_Glomeraceae	397.333	5.33333	9.69981	0.000632317	4	279.795	504.205	Two Sample t-test	two.sided	C1 vs P1	0.0167542	.
6	OTU1161_unidentified_fungus	9.33333	0.333333	1.5237	0.202258	4	-7.39958	25.3996	Two Sample t-test	two.sided	C1 vs P1	0.361476
7	OTU1224_Piskurozymaceae	1096.67	732.667	2.77869	0.0498854	4	0.293934	727.706	Two Sample t-test	two.sided	C1 vs P1	0.146396
8	OTU1279_unidentified_fungus	82.6667	69	1.26109	0.275815	4	-16.4222	43.7555	Two Sample t-test	two.sided	C1 vs P1	0.431466
9	OTU1301_Spizellomycetaceae	377.667	210	0.884081	0.426591	4	-358.889	694.222	Two Sample t-test	two.sided	C1 vs P1	0.560485
10	OTU130_unidentified_fungus	9.33333	0	4.26996	0.0129505	4	3.26454	15.4021	Two Sample t-test	two.sided	C1 vs P1	0.0613447
11	OTU1318_Ceratobasidiaceae	44.6667	1	6.25229	0.00333684	4	24.2757	63.0577	Two Sample t-test	two.sided	C1 vs P1	0.0377301	.
12	OTU1385_Stephanosporaceae	8.66667	0	3.04307	0.038287	4	0.759348	16.574	Two Sample t-test	two.sided	C1 vs P1	0.13513
13	OTU1448_Incertae_sedis	3.66667	36.6667	-6.79935	0.00244407	4	-46.4752	-19.5248	Two Sample t-test	two.sided	C1 vs P1	0.0377301	.
14	OTU1492_Paraglomeraceae	337	5	4.00611	0.0160484	4	101.907	562.093	Two Sample t-test	two.sided	C1 vs P1	0.0704562
15	OTU1504_unidentified_fungus	686.333	28.3333	6.24371	0.00335378	4	365.401	950.599	Two Sample t-test	two.sided	C1 vs P1	0.0377301	.
16	OTU1507_Entolomataceae	796.333	729.333	0.277809	0.794927	4	-602.604	736.604	Two Sample t-test	two.sided	C1 vs P1	0.837111
17	OTU1554_unidentified_fungus	25	91	-2.29181	0.0836897	4	-145.956	13.9565	Two Sample t-test	two.sided	C1 vs P1	0.195638
18	OTU1576_unidentified_fungus	112	37.6667	3.00202	0.0398624	4	5.58555	143.081	Two Sample t-test	two.sided	C1 vs P1	0.137247
19	OTU1595_unidentified_fungus	1083	286.333	5.78245	0.00444344	4	414.147	1179.19	Two Sample t-test	two.sided	C1 vs P1	0.0430203	.
20	OTU1673_unidentified_fungus	1418.33	72	24.7833	1.5733e-05	4	1195.51	1497.16	Two Sample t-test	two.sided	C1 vs P1	0.00232543	*
21	OTU1736_Mrakiaceae	10.3333	111.333	-2.84774	0.046502	4	-199.471	-2.52857	Two Sample t-test	two.sided	C1 vs P1	0.146396
22	OTU1737_unidentified_fungus	31	15.3333	1.62943	0.178554	4	-11.0283	42.3616	Two Sample t-test	two.sided	C1 vs P1	0.340391
23	OTU1738_Thelephoraceae	1	24.6667	-1.16629	0.308293	4	-80.0071	32.6738	Two Sample t-test	two.sided	C1 vs P1	0.454859
24	OTU1781_Clavariaceae	7	12	-0.430864	0.68877	4	-37.2195	27.2195	Two Sample t-test	two.sided	C1 vs P1	0.784675
25	OTU1782_Claroideoglomeraceae	390.667	7	5.66748	0.00478003	4	195.712	571.621	Two Sample t-test	two.sided	C1 vs P1	0.0430203	.
26	OTU1783_unidentified_fungus	11.3333	3.66667	1.14429	0.316324	4	-10.9353	26.2686	Two Sample t-test	two.sided	C1 vs P1	0.458717
27	OTU1805_Mucoraceae	120.667	254	-2.44572	0.070771	4	-284.697	18.0303	Two Sample t-test	two.sided	C1 vs P1	0.188546
28	OTU1807_unidentified_fungus	19.6667	55.3333	-0.773496	0.4824	4	-163.691	92.3579	Two Sample t-test	two.sided	C1 vs P1	0.607216
29	OTU1833_unidentified_fungus	6	3.66667	0.409644	0.703055	4	-13.4813	18.148	Two Sample t-test	two.sided	C1 vs P1	0.790937
30	OTU1852_Sebacinaceae	327.333	4.33333	3.67777	0.0212455	4	79.1588	566.841	Two Sample t-test	two.sided	C1 vs P1	0.0813659
31	OTU1853_Hydnodontaceae	218.667	12.6667	2.73746	0.0520413	4	-2.93352	414.934	Two Sample t-test	two.sided	C1 vs P1	0.146396
32	OTU1879_Leucosporidiaceae	10	14.6667	-0.368421	0.731229	4	-39.835	30.5016	Two Sample t-test	two.sided	C1 vs P1	0.804393
33	OTU1930_unidentified_fungus	319.667	68.6667	4.68398	0.00941978	4	102.219	399.781	Two Sample t-test	two.sided	C1 vs P1	0.0529863
34	OTU1961_unidentified_fungus	1017.33	161.333	5.6762	0.00475344	4	437.298	1274.7	Two Sample t-test	two.sided	C1 vs P1	0.0430203	.
35	OTU1981_Lyophyllaceae	19	15.6667	0.418487	0.697083	4	-18.7816	25.4483	Two Sample t-test	two.sided	C1 vs P1	0.789151
36	OTU2021_Incertae_sedis	628.333	438.333	1.11383	0.327764	4	-283.612	663.612	Two Sample t-test	two.sided	C1 vs P1	0.467063
37	OTU2030_unidentified_fungus	12	1.33333	2.74398	0.0516935	4	-0.126212	21.4595	Two Sample t-test	two.sided	C1 vs P1	0.146396
38	OTU2034_unidentified_fungus	10.3333	13	-0.352865	0.741999	4	-23.6488	18.3155	Two Sample t-test	two.sided	C1 vs P1	0.809454
39	OTU2038_Inocybaceae	1.66667	14.6667	-1.52269	0.202498	4	-36.7039	10.7039	Two Sample t-test	two.sided	C1 vs P1	0.361476
40	OTU2060_unidentified_fungus	7585	5794	3.42896	0.0265609	4	340.82	3241.18	Two Sample t-test	two.sided	C1 vs P1	0.0975706
41	OTU2101_Serendipitaceae	43.3333	9.33333	2.26555	0.0861504	4	-7.66724	75.6672	Two Sample t-test	two.sided	C1 vs P1	0.198809
42	OTU2174_Rhizophydiaceae	53.6667	7	2.04168	0.110733	4	-16.7947	110.128	Two Sample t-test	two.sided	C1 vs P1	0.240143
43	OTU2188_Psathyrellaceae	126.333	59	6.33108	0.00318605	4	37.8048	96.8619	Two Sample t-test	two.sided	C1 vs P1	0.0377301	.
44	OTU2189_Cystobasidiaceae	20.6667	0	4.29893	0.0126564	4	7.31918	34.0142	Two Sample t-test	two.sided	C1 vs P1	0.0613447
45	OTU2216_Bolbitiaceae	209.667	1.66667	5.35469	0.00586714	4	100.151	315.849	Two Sample t-test	two.sided	C1 vs P1	0.04662	.
46	OTU2217_Strophariaceae	38.6667	2.33333	2.05186	0.109459	4	-12.8306	85.4972	Two Sample t-test	two.sided	C1 vs P1	0.240143
47	OTU2266_Sebacinaceae	42.6667	2	2.19864	0.0927928	4	-10.6871	92.0205	Two Sample t-test	two.sided	C1 vs P1	0.208784
48	OTU2268_Sporidiobolaceae	23.3333	1.33333	4.97494	0.0076247	4	9.7221	34.2779	Two Sample t-test	two.sided	C1 vs P1	0.0473257	.
49	OTU2270_unidentified_fungus	19	1	2.4198	0.072779	4	-2.65297	38.653	Two Sample t-test	two.sided	C1 vs P1	0.188546
50	OTU2326_unidentified_fungus	31	0.666667	2.87767	0.0451186	4	1.06703	59.5996	Two Sample t-test	two.sided	C1 vs P1	0.146396
51	OTU2328_Diversisporaceae	140.333	13.6667	9.42664	0.000706032	4	89.3593	163.974	Two Sample t-test	two.sided	C1 vs P1	0.0167542	.
52	OTU2353_unidentified_fungus	0.666667	1	-0.316228	0.767644	4	-3.25996	2.5933	Two Sample t-test	two.sided	C1 vs P1	0.827401
53	OTU2379_Debaryomycetaceae	8.33333	3.66667	0.696526	0.524455	4	-13.9353	23.2686	Two Sample t-test	two.sided	C1 vs P1	0.63785
54	OTU238_unidentified_fungus	12.6667	2	1.37579	0.240898	4	-10.8595	32.1928	Two Sample t-test	two.sided	C1 vs P1	0.40877
55	OTU2409_Pluteaceae	37.6667	2	2.41688	0.0730087	4	-5.30615	76.6395	Two Sample t-test	two.sided	C1 vs P1	0.188546
56	OTU2413_Mycenaceae	11.6667	0	1.04443	0.355248	4	-19.3473	42.6807	Two Sample t-test	two.sided	C1 vs P1	0.488127
57	OTU2445_Pyriculariaceae	9.33333	1.66667	1.81265	0.144102	4	-4.07638	19.4097	Two Sample t-test	two.sided	C1 vs P1	0.294754
58	OTU2446_unidentified_fungus	12.3333	0	2.54719	0.0634947	4	-1.11006	25.7767	Two Sample t-test	two.sided	C1 vs P1	0.175832
59	OTU2462_unidentified_fungus	739.333	24.3333	14.5298	0.000130474	4	578.373	851.627	Two Sample t-test	two.sided	C1 vs P1	0.00782845	*
60	OTU2489_unidentified_fungus	1.33333	16.3333	-0.917032	0.411014	4	-60.4147	30.4147	Two Sample t-test	two.sided	C1 vs P1	0.543989
61	OTU2517_Clavicipitaceae	224.333	420	-2.3453	0.0789197	4	-427.303	35.9701	Two Sample t-test	two.sided	C1 vs P1	0.189407
62	OTU2544_Incertae_sedis	46.3333	118	-1.29216	0.265899	4	-225.656	82.3225	Two Sample t-test	two.sided	C1 vs P1	0.427338
63	OTU2599_Lipomycetaceae	152.333	284.333	-2.94141	0.0423295	4	-256.597	-7.40321	Two Sample t-test	two.sided	C1 vs P1	0.141098
64	OTU2643_Meruliaceae	4.33333	2.66667	0.497519	0.64493	4	-7.63431	10.9676	Two Sample t-test	two.sided	C1 vs P1	0.748951
65	OTU2655_Archaeosporaceae	421.333	5.33333	6.72965	0.00253987	4	244.371	587.629	Two Sample t-test	two.sided	C1 vs P1	0.0377301	.
66	OTU2672_unidentified_fungus	74	101.667	-0.783333	0.477215	4	-125.728	70.3951	Two Sample t-test	two.sided	C1 vs P1	0.607126
67	OTU2675_Peltigeraceae	5	2.66667	0.733799	0.503762	4	-6.4952	11.1619	Two Sample t-test	two.sided	C1 vs P1	0.629703
68	OTU2692_Amylocorticiaceae	4.33333	5.33333	-0.1693	0.873778	4	-17.3996	15.3996	Two Sample t-test	two.sided	C1 vs P1	0.898743
69	OTU2701_unidentified_fungus	3	1	1.41421	0.2302	4	-1.92649	5.92649	Two Sample t-test	two.sided	C1 vs P1	0.394628
70	OTU2710_Plectosphaerellaceae	514.667	546	-0.372696	0.728282	4	-264.755	202.088	Two Sample t-test	two.sided	C1 vs P1	0.804393
71	OTU2750_unidentified_fungus	49.3333	25.3333	1.13828	0.318554	4	-34.5399	82.5399	Two Sample t-test	two.sided	C1 vs P1	0.458717
72	OTU2762_Trichosporonaceae	422.667	1113	-1.23598	0.284087	4	-2241.07	860.4	Two Sample t-test	two.sided	C1 vs P1	0.433354
73	OTU2766_Pyronemataceae	4248	5347.67	-0.307156	0.774052	4	-11039.8	8840.45	Two Sample t-test	two.sided	C1 vs P1	0.829341
74	OTU2771_Tremellaceae	10.6667	17.6667	-0.591843	0.585787	4	-39.8383	25.8383	Two Sample t-test	two.sided	C1 vs P1	0.698289
75	OTU2775_unidentified_fungus	1352.67	698	3.83655	0.018514	4	180.896	1128.44	Two Sample t-test	two.sided	C1 vs P1	0.0740561
76	OTU2811_unidentified_fungus	16	1180	-2.30768	0.0822419	4	-2564.45	236.448	Two Sample t-test	two.sided	C1 vs P1	0.194783
77	OTU2815_Hypocreaceae	69.3333	120.667	-0.819799	0.458369	4	-225.186	122.519	Two Sample t-test	two.sided	C1 vs P1	0.597872
78	OTU2834_Incertae_sedis	0	18	-1.43962	0.223389	4	-52.7148	16.7148	Two Sample t-test	two.sided	C1 vs P1	0.389521
79	OTU2862_Magnaporthaceae	58	4.33333	3.96595	0.0165948	4	16.0962	91.2371	Two Sample t-test	two.sided	C1 vs P1	0.0705129
80	OTU2863_Pleurotheciaceae	7.66667	0	1.99435	0.116868	4	-3.00651	18.3398	Two Sample t-test	two.sided	C1 vs P1	0.247485
81	OTU2899_Trimorphomycetaceae	179.333	185.333	-0.139351	0.895908	4	-125.545	113.545	Two Sample t-test	two.sided	C1 vs P1	0.916269
82	OTU2900_Microascaceae	247	188.333	0.780022	0.478955	4	-150.154	267.487	Two Sample t-test	two.sided	C1 vs P1	0.607126
83	OTU2907_Stachybotryaceae	11.6667	4.66667	1.22683	0.287159	4	-8.84169	22.8417	Two Sample t-test	two.sided	C1 vs P1	0.434357
84	OTU2917_Nectriaceae	1692.67	1529.67	0.296382	0.78169	4	-1363.95	1689.95	Two Sample t-test	two.sided	C1 vs P1	0.832569
85	OTU2954_Incertae_sedis	207	256.333	-1.26091	0.275873	4	-157.962	59.2955	Two Sample t-test	two.sided	C1 vs P1	0.431466
86	OTU2967_Sporormiaceae	508.333	542.333	-0.20526	0.847392	4	-493.901	425.901	Two Sample t-test	two.sided	C1 vs P1	0.876612
87	OTU2969_unidentified_fungus	600	161.667	3.78341	0.0193787	4	116.664	760.003	Two Sample t-test	two.sided	C1 vs P1	0.0758297
88	OTU3001_Pseudeurotiaceae	34.6667	1	11.5855	0.000317121	4	25.5985	41.7348	Two Sample t-test	two.sided	C1 vs P1	0.0142704	.
89	OTU3007_Didymellaceae	621.333	1353.67	-2.77019	0.0503214	4	-1466.32	1.65476	Two Sample t-test	two.sided	C1 vs P1	0.146396
90	OTU3036_Coniochaetaceae	340.667	453	-0.990252	0.378107	4	-427.291	202.624	Two Sample t-test	two.sided	C1 vs P1	0.507904
91	OTU303_Acaulosporaceae	0.333333	0.666667	-0.447214	0.677869	4	-2.40277	1.73611	Two Sample t-test	two.sided	C1 vs P1	0.777174
92	OTU3049_Bionectriaceae	184.667	150	0.940455	0.400232	4	-67.6776	137.011	Two Sample t-test	two.sided	C1 vs P1	0.533643
93	OTU3069_Ascobolaceae	344.333	18.3333	2.98816	0.0404116	4	23.0973	628.903	Two Sample t-test	two.sided	C1 vs P1	0.137247
94	OTU3103_Microdochiaceae	73.3333	56	1.27629	0.27092	4	-20.3737	55.0403	Two Sample t-test	two.sided	C1 vs P1	0.431466
95	OTU3129_Incertae_sedis	11.6667	215.333	-4.71369	0.00921451	4	-323.63	-83.7034	Two Sample t-test	two.sided	C1 vs P1	0.0529863
96	OTU3161_Helotiaceae	400	977	-3.94811	0.0168448	4	-982.766	-171.234	Two Sample t-test	two.sided	C1 vs P1	0.0705129
97	OTU3162_unidentified_fungus	3.33333	27.6667	-1.33569	0.252585	4	-74.9141	26.2474	Two Sample t-test	two.sided	C1 vs P1	0.41332
98	OTU3192_Pseudeurotiaceae	6541.67	2882	3.18327	0.0334306	4	467.705	6851.63	Two Sample t-test	two.sided	C1 vs P1	0.12035
99	OTU3196_Aspergillaceae	43.3333	212	-4.2271	0.0134011	4	-279.45	-57.883	Two Sample t-test	two.sided	C1 vs P1	0.0618514
100	OTU3198_Cordycipitaceae	3.66667	36.6667	-5.38489	0.00574983	4	-50.0148	-15.9852	Two Sample t-test	two.sided	C1 vs P1	0.04662	.
101	OTU3241_unidentified_fungus	251.333	982	-6.3875	0.00308319	4	-1048.26	-413.069	Two Sample t-test	two.sided	C1 vs P1	0.0377301	.
102	OTU3244_Thelebolaceae	103.667	125	-0.706762	0.518711	4	-105.139	62.4726	Two Sample t-test	two.sided	C1 vs P1	0.636977
103	OTU3255_Gymnoascaceae	67.3333	37	4.27084	0.0129415	4	10.6138	50.0528	Two Sample t-test	two.sided	C1 vs P1	0.0613447
104	OTU3257_Ascodesmidaceae	14	4.33333	1.08682	0.338224	4	-15.0283	34.3616	Two Sample t-test	two.sided	C1 vs P1	0.475628
105	OTU3258_unidentified_fungus	6.66667	13.6667	-0.472776	0.661015	4	-48.1085	34.1085	Two Sample t-test	two.sided	C1 vs P1	0.76271
106	OTU3260_unidentified_fungus	1385.67	2990.67	-2.41226	0.0733749	4	-3452.31	242.31	Two Sample t-test	two.sided	C1 vs P1	0.188546
107	OTU3308_Incertae_sedis	1047.67	440.333	5.17743	0.00661801	4	281.645	933.021	Two Sample t-test	two.sided	C1 vs P1	0.04662	.
108	OTU3314_Torulaceae	26.6667	7.66667	1.84932	0.138098	4	-9.52526	47.5253	Two Sample t-test	two.sided	C1 vs P1	0.285719
109	OTU3318_Arthopyreniaceae	24.3333	17.6667	0.813116	0.461778	4	-16.0972	29.4305	Two Sample t-test	two.sided	C1 vs P1	0.597986
110	OTU3344_Periconiaceae	1	24.6667	-1.02119	0.364901	4	-88.0126	40.6793	Two Sample t-test	two.sided	C1 vs P1	0.497593
111	OTU3349_Pleosporaceae	119.667	32	2.35159	0.078379	4	-15.8384	191.172	Two Sample t-test	two.sided	C1 vs P1	0.189407
112	OTU3392_unidentified_fungus	88	42.3333	2.39982	0.074371	4	-7.16691	98.5002	Two Sample t-test	two.sided	C1 vs P1	0.188546
113	OTU3409_Chaetosphaeriaceae	35	395.667	-1.52132	0.202828	4	-1018.89	297.56	Two Sample t-test	two.sided	C1 vs P1	0.361476
114	OTU3410_Didymosphaeriaceae	48	344	-1.66212	0.171824	4	-790.446	198.446	Two Sample t-test	two.sided	C1 vs P1	0.339263
115	OTU3412_unidentified_fungus	166	351.333	-4.98339	0.00757908	4	-288.59	-82.0768	Two Sample t-test	two.sided	C1 vs P1	0.0473257	.
116	OTU3414_Onygenaceae	38.3333	17.3333	1.36059	0.245262	4	-21.8529	63.8529	Two Sample t-test	two.sided	C1 vs P1	0.40877
117	OTU3419_Leptosphaeriaceae	52	9	2.74904	0.0514251	4	-0.428666	86.4287	Two Sample t-test	two.sided	C1 vs P1	0.146396
118	OTU3428_Lophiostomataceae	49.6667	206.667	-1.24299	0.281755	4	-507.689	193.689	Two Sample t-test	two.sided	C1 vs P1	0.433354
119	OTU3436_Phomatosporaceae	0.333333	61.3333	-1.74531	0.155867	4	-158.039	36.0389	Two Sample t-test	two.sided	C1 vs P1	0.315237
120	OTU3438_Aureobasidiaceae	4	4.33333	-0.0678844	0.949136	4	-13.9665	13.2999	Two Sample t-test	two.sided	C1 vs P1	0.954438
121	OTU3472_Phaeosphaeriaceae	237	560.667	-2.43951	0.0712458	4	-692.036	44.703	Two Sample t-test	two.sided	C1 vs P1	0.188546
122	OTU3473_Ophiocordycipitaceae	48.3333	24	1.62423	0.179651	4	-17.2619	65.9286	Two Sample t-test	two.sided	C1 vs P1	0.340391
123	OTU3478_Massarinaceae	234	13.6667	21.8759	2.58381e-05	4	192.369	248.298	Two Sample t-test	two.sided	C1 vs P1	0.00232543	*
124	OTU3529_Chaetomiaceae	594	343.667	3.88916	0.0177033	4	71.6219	429.045	Two Sample t-test	two.sided	C1 vs P1	0.0724224
125	OTU3530_Apiosporaceae	100.667	105.667	-0.0783047	0.941346	4	-182.285	172.285	Two Sample t-test	two.sided	C1 vs P1	0.951923
126	OTU3538_Cephalothecaceae	2.33333	39.3333	-4.74169	0.00902599	4	-58.665	-15.335	Two Sample t-test	two.sided	C1 vs P1	0.0529863
127	OTU3551_Verrucariaceae	3.66667	8.33333	-0.552967	0.609734	4	-28.098	18.7647	Two Sample t-test	two.sided	C1 vs P1	0.713875
128	OTU3585_Bartaliniaceae	30.3333	45.6667	-0.681052	0.533224	4	-77.8428	47.1761	Two Sample t-test	two.sided	C1 vs P1	0.644163
129	OTU358_unidentified_fungus	105.333	88	0.388645	0.717339	4	-106.495	141.161	Two Sample t-test	two.sided	C1 vs P1	0.801994
130	OTU3618_Vibrisseaceae	22	0.333333	4.29532	0.0126925	4	7.66159	35.6717	Two Sample t-test	two.sided	C1 vs P1	0.0613447
131	OTU3621_Melanommataceae	19.6667	1	2.75892	0.0509059	4	-0.11856	37.4519	Two Sample t-test	two.sided	C1 vs P1	0.146396
132	OTU3622_Trichocomaceae	18	26.3333	-1.15072	0.313958	4	-28.4399	11.7733	Two Sample t-test	two.sided	C1 vs P1	0.458717
133	OTU3655_Tubeufiaceae	1.66667	15.6667	-1.53773	0.198935	4	-39.2777	11.2777	Two Sample t-test	two.sided	C1 vs P1	0.361476
134	OTU3670_Lasiosphaeriaceae	634	473	0.786424	0.475594	4	-407.406	729.406	Two Sample t-test	two.sided	C1 vs P1	0.607126
135	OTU3672_Cladosporiaceae	119	394.333	-2.36711	0.077063	4	-598.279	47.612	Two Sample t-test	two.sided	C1 vs P1	0.189407
136	OTU3703_Lentitheciaceae	21.3333	3.66667	1.64346	0.175633	4	-12.1792	47.5126	Two Sample t-test	two.sided	C1 vs P1	0.339934
137	OTU3729_Mycosphaerellaceae	1	16.3333	-4.46791	0.0110925	4	-24.8618	-5.80492	Two Sample t-test	two.sided	C1 vs P1	0.0587248
138	OTU3742_unidentified_fungus	43.3333	18.3333	1.43332	0.225057	4	-23.4267	73.4267	Two Sample t-test	two.sided	C1 vs P1	0.389521
139	OTU3748_Cucurbitariaceae	76.6667	106.333	-0.712936	0.515269	4	-145.2	85.8667	Two Sample t-test	two.sided	C1 vs P1	0.636977
140	OTU3815_Leotiaceae	5.33333	4.66667	0.104257	0.921984	4	-17.0872	18.4205	Two Sample t-test	two.sided	C1 vs P1	0.93761
141	OTU3863_unidentified_fungus	1287.33	1220.67	0.242959	0.819988	4	-695.176	828.509	Two Sample t-test	two.sided	C1 vs P1	0.858127
142	OTU3873_Venturiaceae	9.33333	286.333	-1.25422	0.278056	4	-890.192	336.192	Two Sample t-test	two.sided	C1 vs P1	0.431466
143	OTU3885_Acrospermaceae	60.3333	0	9.29735	0.000744632	4	42.3161	78.3505	Two Sample t-test	two.sided	C1 vs P1	0.0167542	.
144	OTU3904_Teratosphaeriaceae	1.66667	17.3333	-6.6468	0.00265981	4	-22.2108	-9.12252	Two Sample t-test	two.sided	C1 vs P1	0.0377301	.
145	OTU3936_Myrmecridiaceae	6	122.333	-1.94183	0.124116	4	-282.668	50.0012	Two Sample t-test	two.sided	C1 vs P1	0.259779
146	OTU3944_Dermateaceae	0.666667	0	1	0.373901	4	-1.1843	2.51763	Two Sample t-test	two.sided	C1 vs P1	0.506031
147	OTU4003_Hyaloscyphaceae	145.333	121.333	0.559418	0.605717	4	-95.1142	143.114	Two Sample t-test	two.sided	C1 vs P1	0.713875
148	OTU4010_unidentified_fungus	46.6667	72.6667	-0.704104	0.520198	4	-128.524	76.524	Two Sample t-test	two.sided	C1 vs P1	0.636977
149	OTU4040_Myxotrichaceae	2	2.66667	-0.21693	0.838878	4	-9.19919	7.86585	Two Sample t-test	two.sided	C1 vs P1	0.872821
150	OTU4042_Bulleribasidiaceae	13.3333	58	-4.03658	0.0156481	4	-75.3893	-13.944	Two Sample t-test	two.sided	C1 vs P1	0.0704165
151	OTU4046_Aphelididae	2	1.33333	0.27735	0.795255	4	-6.00708	7.34041	Two Sample t-test	two.sided	C1 vs P1	0.837111
152	OTU4053_Herpotrichiellaceae	119.667	336.667	-1.58509	0.188126	4	-597.098	163.098	Two Sample t-test	two.sided	C1 vs P1	0.3491
153	OTU4067_Teloschistaceae	29.3333	1.66667	5.118	0.00689571	4	12.6579	42.6755	Two Sample t-test	two.sided	C1 vs P1	0.04662	.
154	OTU4095_unidentified_fungus	36.3333	16.3333	1.18632	0.301145	4	-26.8078	66.8078	Two Sample t-test	two.sided	C1 vs P1	0.449038
155	OTU4105_Archaeorhizomycetaceae	40.6667	2.33333	2.22349	0.090261	4	-9.53295	86.1996	Two Sample t-test	two.sided	C1 vs P1	0.205658
156	OTU4124_Sanchytriaceae	4	5.66667	-0.625	0.565856	4	-9.07052	5.73719	Two Sample t-test	two.sided	C1 vs P1	0.679027
157	OTU4147_unidentified_fungus	84.3333	63.6667	0.366013	0.732892	4	-136.103	177.437	Two Sample t-test	two.sided	C1 vs P1	0.804393
158	OTU4182_unidentified_fungus	19.6667	6.33333	1.04793	0.353815	4	-21.9929	48.6596	Two Sample t-test	two.sided	C1 vs P1	0.488127
159	OTU430_Physalacriaceae	29.3333	3	3.62477	0.0222628	4	6.16293	46.5037	Two Sample t-test	two.sided	C1 vs P1	0.0834857
160	OTU514_unidentified_fungus	12	3.66667	1.1092	0.329539	4	-12.526	29.1926	Two Sample t-test	two.sided	C1 vs P1	0.467063
161	OTU52_unidentified_fungus	13.6667	0.666667	2.73726	0.052052	4	-0.186085	26.1861	Two Sample t-test	two.sided	C1 vs P1	0.146396
162	OTU544_unidentified_fungus	9.33333	2.66667	1.32745	0.255055	4	-7.27712	20.6105	Two Sample t-test	two.sided	C1 vs P1	0.413602
163	OTU590_Physodermataceae	51	14	1.65524	0.173218	4	-25.0625	99.0625	Two Sample t-test	two.sided	C1 vs P1	0.339263
164	OTU597_Malasseziaceae	7	1	1.18431	0.301853	4	-8.0661	20.0661	Two Sample t-test	two.sided	C1 vs P1	0.449038
165	OTU624_unidentified_fungus	624	348.333	1.36662	0.243521	4	-284.381	835.714	Two Sample t-test	two.sided	C1 vs P1	0.40877
166	OTU63_Piptocephalidaceae	5	9.33333	-0.551323	0.61076	4	-26.1559	17.4892	Two Sample t-test	two.sided	C1 vs P1	0.713875
167	OTU64_unidentified_fungus	165	1588.67	-1.58989	0.187065	4	-3909.84	1062.5	Two Sample t-test	two.sided	C1 vs P1	0.3491
168	OTU669_unidentified_fungus	60	10.6667	2.81662	0.0479926	4	0.703695	97.963	Two Sample t-test	two.sided	C1 vs P1	0.146396
169	OTU699_unidentified_fungus	3.66667	1.66667	1.34164	0.250815	4	-2.13888	6.13888	Two Sample t-test	two.sided	C1 vs P1	0.41332
170	OTU74_unidentified_fungus	288.667	7.33333	4.61126	0.00994619	4	111.942	450.724	Two Sample t-test	two.sided	C1 vs P1	0.0542519
171	OTU752_unidentified_fungus	38	6.66667	5.09787	0.00699299	4	14.2683	48.3984	Two Sample t-test	two.sided	C1 vs P1	0.04662	.
172	OTU766_Incertae_sedis	93	238.333	-1.04858	0.353549	4	-530.15	239.483	Two Sample t-test	two.sided	C1 vs P1	0.488127
173	OTU844_Halomycetaceae	62.6667	9.66667	6.07065	0.00371933	4	28.7602	77.2398	Two Sample t-test	two.sided	C1 vs P1	0.0393811	.
174	OTU848_unidentified_fungus	4	0	2	0.116117	4	-1.55289	9.55289	Two Sample t-test	two.sided	C1 vs P1	0.247485
175	OTU903_unidentified_fungus	87	35	2.37182	0.076669	4	-8.87109	112.871	Two Sample t-test	two.sided	C1 vs P1	0.189407
176	OTU915_unidentified_fungus	10.6667	2	1.65434	0.173401	4	-5.87842	23.2118	Two Sample t-test	two.sided	C1 vs P1	0.339263
177	OTU923_unidentified_fungus	111.333	15	7.15163	0.00202275	4	58.9343	133.732	Two Sample t-test	two.sided	C1 vs P1	0.0377301	.
178	OTU92_unidentified_fungus	616.333	10.3333	5.26806	0.00622033	4	286.618	925.382	Two Sample t-test	two.sided	C1 vs P1	0.04662	.
179	OTU954_Mortierellaceae	10653.7	17505.3	-5.3003	0.00608595	4	-10440.8	-3262.57	Two Sample t-test	two.sided	C1 vs P1	0.04662	.
180	OTU980_Olpidiaceae	20	20.6667	-0.0489116	0.963335	4	-38.5097	37.1764	Two Sample t-test	two.sided	C1 vs P1	0.963335
181	OTU102_unidentified_fungus	88.6667	16	4.58566	0.01014	4	28.6698	116.664	Two Sample t-test	two.sided	C1 vs P2	0.0301014	.
182	OTU104_Amanitaceae	17	13.3333	0.315058	0.768469	4	-28.6458	35.9791	Two Sample t-test	two.sided	C1 vs P2	0.804211
183	OTU1123_Corticiaceae	21.3333	0	2.20297	0.0923464	4	-5.55346	48.2201	Two Sample t-test	two.sided	C1 vs P2	0.140632
184	OTU1151_unidentified_fungus	15	0	9.81981	0.00060297	4	10.7589	19.2411	Two Sample t-test	two.sided	C1 vs P2	0.00626941	*
185	OTU1158_Glomeraceae	397.333	4.66667	9.72127	0.000626941	4	280.519	504.814	Two Sample t-test	two.sided	C1 vs P2	0.00626941	*
186	OTU1161_unidentified_fungus	9.33333	0	1.58265	0.188666	4	-7.04011	25.7068	Two Sample t-test	two.sided	C1 vs P2	0.244316
187	OTU1224_Piskurozymaceae	1096.67	162.667	8.76945	0.000932226	4	638.292	1229.71	Two Sample t-test	two.sided	C1 vs P2	0.00714284	*
188	OTU1279_unidentified_fungus	82.6667	7.33333	7.40288	0.00177616	4	47.0796	103.587	Two Sample t-test	two.sided	C1 vs P2	0.0105181	.
189	OTU1301_Spizellomycetaceae	377.667	21.3333	6.92828	0.00227833	4	213.536	499.131	Two Sample t-test	two.sided	C1 vs P2	0.0121706	.
190	OTU130_unidentified_fungus	9.33333	0.333333	4.0704	0.0152179	4	2.86105	15.139	Two Sample t-test	two.sided	C1 vs P2	0.0377468	.
191	OTU1318_Ceratobasidiaceae	44.6667	0.666667	6.29285	0.00325813	4	24.5869	63.4131	Two Sample t-test	two.sided	C1 vs P2	0.0146616	.
192	OTU1385_Stephanosporaceae	8.66667	0	3.04307	0.038287	4	0.759348	16.574	Two Sample t-test	two.sided	C1 vs P2	0.0764846
193	OTU1448_Incertae_sedis	3.66667	0	2.52357	0.0651085	4	-0.367415	7.70075	Two Sample t-test	two.sided	C1 vs P2	0.108514
194	OTU1492_Paraglomeraceae	337	3	4.03044	0.0157278	4	103.918	564.082	Two Sample t-test	two.sided	C1 vs P2	0.0377468	.
195	OTU1504_unidentified_fungus	686.333	13	6.41441	0.00303556	4	381.884	964.782	Two Sample t-test	two.sided	C1 vs P2	0.0140103	.
196	OTU1507_Entolomataceae	796.333	40.3333	10.949	0.000395259	4	564.293	947.707	Two Sample t-test	two.sided	C1 vs P2	0.00474311	*
197	OTU1554_unidentified_fungus	25	13	4.15692	0.0141805	4	3.98509	20.0149	Two Sample t-test	two.sided	C1 vs P2	0.0364641	.
198	OTU1576_unidentified_fungus	112	3.66667	6.46135	0.00295465	4	61.7824	154.884	Two Sample t-test	two.sided	C1 vs P2	0.0139957	.
199	OTU1595_unidentified_fungus	1083	50.6667	8.07988	0.00127478	4	677.598	1387.07	Two Sample t-test	two.sided	C1 vs P2	0.0084985	*
200	OTU1673_unidentified_fungus	1418.33	26.6667	26.6617	1.17636e-05	4	1246.74	1536.59	Two Sample t-test	two.sided	C1 vs P2	0.000871324	**
201	OTU1736_Mrakiaceae	10.3333	1.33333	1.86763	0.135201	4	-4.37953	22.3795	Two Sample t-test	two.sided	C1 vs P2	0.185773
202	OTU1737_unidentified_fungus	31	3.33333	3.01669	0.039291	4	2.2033	53.13	Two Sample t-test	two.sided	C1 vs P2	0.0764846
203	OTU1738_Thelephoraceae	1	3.66667	-0.8	0.468527	4	-11.9215	6.58815	Two Sample t-test	two.sided	C1 vs P2	0.508041
204	OTU1781_Clavariaceae	7	0.333333	4.26401	0.0130119	4	2.32577	11.0076	Two Sample t-test	two.sided	C1 vs P2	0.0364641	.
205	OTU1782_Claroideoglomeraceae	390.667	10.3333	5.62205	0.00492157	4	192.506	568.161	Two Sample t-test	two.sided	C1 vs P2	0.0189975	.
206	OTU1783_unidentified_fungus	11.3333	0	1.8521	0.137654	4	-5.65625	28.3229	Two Sample t-test	two.sided	C1 vs P2	0.187711
207	OTU1805_Mucoraceae	120.667	194.667	-1.00796	0.370499	4	-277.835	129.835	Two Sample t-test	two.sided	C1 vs P2	0.415446
208	OTU1807_unidentified_fungus	19.6667	0	2.96113	0.0415081	4	1.22657	38.1068	Two Sample t-test	two.sided	C1 vs P2	0.0786468
209	OTU1833_unidentified_fungus	6	0.333333	1.13082	0.321337	4	-8.24637	19.5797	Two Sample t-test	two.sided	C1 vs P2	0.385604
210	OTU1852_Sebacinaceae	327.333	5.66667	3.66275	0.0215281	4	77.836	565.497	Two Sample t-test	two.sided	C1 vs P2	0.0496803	.
211	OTU1853_Hydnodontaceae	218.667	2.33333	2.87647	0.0451732	4	7.52284	425.144	Two Sample t-test	two.sided	C1 vs P2	0.0821331
212	OTU1879_Leucosporidiaceae	10	26.6667	-1.32407	0.256074	4	-51.6151	18.2818	Two Sample t-test	two.sided	C1 vs P2	0.31356
213	OTU1930_unidentified_fungus	319.667	6	6.60225	0.00272721	4	181.76	445.573	Two Sample t-test	two.sided	C1 vs P2	0.0132675	.
214	OTU1961_unidentified_fungus	1017.33	184.333	4.59978	0.0100325	4	330.198	1335.8	Two Sample t-test	two.sided	C1 vs P2	0.0301014	.
215	OTU1981_Lyophyllaceae	19	2.33333	3.00421	0.0397766	4	1.26358	32.0698	Two Sample t-test	two.sided	C1 vs P2	0.0764846
216	OTU2021_Incertae_sedis	628.333	15.3333	17.9682	5.6392e-05	4	518.279	707.721	Two Sample t-test	two.sided	C1 vs P2	0.00253764	*
217	OTU2030_unidentified_fungus	12	21	-1.55885	0.194039	4	-25.0298	7.02981	Two Sample t-test	two.sided	C1 vs P2	0.249478
218	OTU2034_unidentified_fungus	10.3333	1	3.09208	0.0365004	4	0.95274	17.7139	Two Sample t-test	two.sided	C1 vs P2	0.0738211
219	OTU2038_Inocybaceae	1.66667	0.333333	0.784465	0.476621	4	-3.38572	6.05238	Two Sample t-test	two.sided	C1 vs P2	0.513723
220	OTU2060_unidentified_fungus	7585	1846	15.9761	8.97439e-05	4	4741.64	6736.36	Two Sample t-test	two.sided	C1 vs P2	0.00268738	*
221	OTU2101_Serendipitaceae	43.3333	0.333333	3.2958	0.0300516	4	6.77593	79.2241	Two Sample t-test	two.sided	C1 vs P2	0.0635193
222	OTU2174_Rhizophydiaceae	53.6667	3.66667	2.29041	0.0838192	4	-10.6102	110.61	Two Sample t-test	two.sided	C1 vs P2	0.131195
223	OTU2188_Psathyrellaceae	126.333	5	27.7547	1.00243e-05	4	109.196	133.471	Two Sample t-test	two.sided	C1 vs P2	0.000871324	**
224	OTU2189_Cystobasidiaceae	20.6667	0.333333	4.21946	0.0134834	4	6.9538	33.7129	Two Sample t-test	two.sided	C1 vs P2	0.0364641	.
225	OTU2216_Bolbitiaceae	209.667	2.66667	5.32073	0.00600261	4	98.984	315.016	Two Sample t-test	two.sided	C1 vs P2	0.0210285	.
226	OTU2217_Strophariaceae	38.6667	2	2.06995	0.107236	4	-12.5147	85.848	Two Sample t-test	two.sided	C1 vs P2	0.15442
227	OTU2266_Sebacinaceae	42.6667	2.33333	2.17815	0.0949408	4	-11.0788	91.7455	Two Sample t-test	two.sided	C1 vs P2	0.141234
228	OTU2268_Sporidiobolaceae	23.3333	0.666667	5.16994	0.00665223	4	10.4939	34.8395	Two Sample t-test	two.sided	C1 vs P2	0.0217709	.
229	OTU2270_unidentified_fungus	19	0.333333	2.52982	0.0646769	4	-1.81974	39.1531	Two Sample t-test	two.sided	C1 vs P2	0.108514
230	OTU2326_unidentified_fungus	31	2.33333	2.69939	0.0541286	4	-0.818315	58.1516	Two Sample t-test	two.sided	C1 vs P2	0.0945937
231	OTU2328_Diversisporaceae	140.333	2.66667	11.8975	0.000285853	4	105.54	169.793	Two Sample t-test	two.sided	C1 vs P2	0.0042878	*
232	OTU2353_unidentified_fungus	0.666667	0.666667	0	1	4	-2.06944	2.06944	Two Sample t-test	two.sided	C1 vs P2	1
233	OTU2379_Debaryomycetaceae	8.33333	0	1.4861	0.211446	4	-7.23568	23.9023	Two Sample t-test	two.sided	C1 vs P2	0.266155
234	OTU238_unidentified_fungus	12.6667	0	1.65217	0.173843	4	-8.61941	33.9527	Two Sample t-test	two.sided	C1 vs P2	0.226752
235	OTU2409_Pluteaceae	37.6667	1	2.49614	0.067043	4	-4.11758	77.4509	Two Sample t-test	two.sided	C1 vs P2	0.110713
236	OTU2413_Mycenaceae	11.6667	0	1.04443	0.355248	4	-19.3473	42.6807	Two Sample t-test	two.sided	C1 vs P2	0.413431
237	OTU2445_Pyriculariaceae	9.33333	0.333333	2.21193	0.0914298	4	-2.29694	20.2969	Two Sample t-test	two.sided	C1 vs P2	0.140632
238	OTU2446_unidentified_fungus	12.3333	0.333333	2.47249	0.0687627	4	-1.47522	25.4752	Two Sample t-test	two.sided	C1 vs P2	0.112521
239	OTU2462_unidentified_fungus	739.333	21.6667	14.8617	0.000119366	4	583.593	851.74	Two Sample t-test	two.sided	C1 vs P2	0.00268738	*
240	OTU2489_unidentified_fungus	1.33333	0	1.51186	0.205106	4	-1.11526	3.78193	Two Sample t-test	two.sided	C1 vs P2	0.261838
241	OTU2517_Clavicipitaceae	224.333	14.6667	6.91167	0.00229889	4	125.443	293.891	Two Sample t-test	two.sided	C1 vs P2	0.0121706	.
242	OTU2544_Incertae_sedis	46.3333	30.3333	2.46235	0.0695158	4	-2.04096	34.041	Two Sample t-test	two.sided	C1 vs P2	0.112728
243	OTU2599_Lipomycetaceae	152.333	33.3333	5.46457	0.00545377	4	58.5383	179.462	Two Sample t-test	two.sided	C1 vs P2	0.0200391	.
244	OTU2643_Meruliaceae	4.33333	0.333333	1.94666	0.12343	4	-1.70505	9.70505	Two Sample t-test	two.sided	C1 vs P2	0.172228
245	OTU2655_Archaeosporaceae	421.333	11	6.62796	0.00268806	4	238.445	582.221	Two Sample t-test	two.sided	C1 vs P2	0.0132675	.
246	OTU2672_unidentified_fungus	74	1	11.4473	0.000332322	4	55.2945	90.7055	Two Sample t-test	two.sided	C1 vs P2	0.004298	*
247	OTU2675_Peltigeraceae	5	3.66667	0.406138	0.70543	4	-7.7816	10.4483	Two Sample t-test	two.sided	C1 vs P2	0.746925
248	OTU2692_Amylocorticiaceae	4.33333	1.33333	0.858116	0.439205	4	-6.70653	12.7065	Two Sample t-test	two.sided	C1 vs P2	0.479133
249	OTU2701_unidentified_fungus	3	0	3	0.039942	4	0.223555	5.77645	Two Sample t-test	two.sided	C1 vs P2	0.0764846
250	OTU2710_Plectosphaerellaceae	514.667	43.3333	8.34963	0.00112474	4	314.604	628.063	Two Sample t-test	two.sided	C1 vs P2	0.00790234	*
251	OTU2750_unidentified_fungus	49.3333	0.666667	3.12054	0.035508	4	5.36639	91.9669	Two Sample t-test	two.sided	C1 vs P2	0.0734649
252	OTU2762_Trichosporonaceae	422.667	139.667	2.66182	0.0562834	4	-12.1866	578.187	Two Sample t-test	two.sided	C1 vs P2	0.0974136
253	OTU2766_Pyronemataceae	4248	37221.3	-13.4253	0.000178057	4	-39792.4	-26154.2	Two Sample t-test	two.sided	C1 vs P2	0.00320503	*
254	OTU2771_Tremellaceae	10.6667	0.666667	1.2958	0.264759	4	-11.4265	31.4265	Two Sample t-test	two.sided	C1 vs P2	0.322004
255	OTU2775_unidentified_fungus	1352.67	354.333	5.9641	0.00396884	4	533.583	1463.08	Two Sample t-test	two.sided	C1 vs P2	0.0159261	.
256	OTU2811_unidentified_fungus	16	17.3333	-0.316228	0.767644	4	-13.0399	10.3732	Two Sample t-test	two.sided	C1 vs P2	0.804211
257	OTU2815_Hypocreaceae	69.3333	1.66667	3.32608	0.0292122	4	11.1819	124.151	Two Sample t-test	two.sided	C1 vs P2	0.0625976
258	OTU2834_Incertae_sedis	0	0.666667	-1	0.373901	4	-2.51763	1.1843	Two Sample t-test	two.sided	C1 vs P2	0.415446
259	OTU2862_Magnaporthaceae	58	2	4.22918	0.0133789	4	19.2361	92.7639	Two Sample t-test	two.sided	C1 vs P2	0.0364641	.
260	OTU2863_Pleurotheciaceae	7.66667	0	1.99435	0.116868	4	-3.00651	18.3398	Two Sample t-test	two.sided	C1 vs P2	0.166954
261	OTU2899_Trimorphomycetaceae	179.333	12.6667	7.30258	0.00186988	4	103.3	230.033	Two Sample t-test	two.sided	C1 vs P2	0.0105181	.
262	OTU2900_Microascaceae	247	22.6667	6.02263	0.00382932	4	120.915	327.752	Two Sample t-test	two.sided	C1 vs P2	0.0159261	.
263	OTU2907_Stachybotryaceae	11.6667	1	2.15744	0.0971675	4	-3.06045	24.3938	Two Sample t-test	two.sided	C1 vs P2	0.143362
264	OTU2917_Nectriaceae	1692.67	89.6667	5.05147	0.00722364	4	721.941	2484.06	Two Sample t-test	two.sided	C1 vs P2	0.0230428	.
265	OTU2954_Incertae_sedis	207	20.6667	7.33624	0.00183777	4	115.814	256.852	Two Sample t-test	two.sided	C1 vs P2	0.0105181	.
266	OTU2967_Sporormiaceae	508.333	74.3333	4.05044	0.0154701	4	136.507	731.493	Two Sample t-test	two.sided	C1 vs P2	0.0377468	.
267	OTU2969_unidentified_fungus	600	18	5.46421	0.00545508	4	286.277	877.723	Two Sample t-test	two.sided	C1 vs P2	0.0200391	.
268	OTU3001_Pseudeurotiaceae	34.6667	0	12.1723	0.000261439	4	26.7593	42.574	Two Sample t-test	two.sided	C1 vs P2	0.0042781	*
269	OTU3007_Didymellaceae	621.333	65.6667	8.31745	0.00114145	4	370.18	741.154	Two Sample t-test	two.sided	C1 vs P2	0.00790234	*
270	OTU3036_Coniochaetaceae	340.667	22.6667	16.0432	8.82707e-05	4	262.967	373.033	Two Sample t-test	two.sided	C1 vs P2	0.00268738	*
271	OTU303_Acaulosporaceae	0.333333	0	1	0.373901	4	-0.592148	1.25882	Two Sample t-test	two.sided	C1 vs P2	0.415446
272	OTU3049_Bionectriaceae	184.667	9.33333	9.16621	0.000786492	4	122.225	228.442	Two Sample t-test	two.sided	C1 vs P2	0.00693103	*
273	OTU3069_Ascobolaceae	344.333	7	3.10737	0.0359635	4	35.9245	638.742	Two Sample t-test	two.sided	C1 vs P2	0.0735617
274	OTU3103_Microdochiaceae	73.3333	3.66667	5.60985	0.00496046	4	35.187	104.146	Two Sample t-test	two.sided	C1 vs P2	0.0189975	.
275	OTU3129_Incertae_sedis	11.6667	12.6667	-0.135804	0.898537	4	-21.4446	19.4446	Two Sample t-test	two.sided	C1 vs P2	0.906911
276	OTU3161_Helotiaceae	400	40.3333	5.03711	0.00729689	4	161.419	557.914	Two Sample t-test	two.sided	C1 vs P2	0.0230428	.
277	OTU3162_unidentified_fungus	3.33333	3	0.131306	0.901872	4	-6.71493	7.38159	Two Sample t-test	two.sided	C1 vs P2	0.906911
278	OTU3192_Pseudeurotiaceae	6541.67	1005	5.25221	0.00628772	4	2609.85	8463.48	Two Sample t-test	two.sided	C1 vs P2	0.0211806	.
279	OTU3196_Aspergillaceae	43.3333	13.6667	1.96233	0.12123	4	-12.3078	71.6411	Two Sample t-test	two.sided	C1 vs P2	0.170479
280	OTU3198_Cordycipitaceae	3.66667	0.333333	1.04257	0.35601	4	-5.54358	12.2102	Two Sample t-test	two.sided	C1 vs P2	0.413431
281	OTU3241_unidentified_fungus	251.333	49.6667	9.3132	0.000739759	4	141.546	261.787	Two Sample t-test	two.sided	C1 vs P2	0.00693103	*
282	OTU3244_Thelebolaceae	103.667	19	6.71216	0.00256462	4	49.6448	119.689	Two Sample t-test	two.sided	C1 vs P2	0.0131895	.
283	OTU3255_Gymnoascaceae	67.3333	7.33333	11.43	0.000334289	4	45.4255	74.5745	Two Sample t-test	two.sided	C1 vs P2	0.004298	*
284	OTU3257_Ascodesmidaceae	14	2.66667	1.45774	0.218653	4	-10.2524	32.9191	Two Sample t-test	two.sided	C1 vs P2	0.273317
285	OTU3258_unidentified_fungus	6.66667	1	0.979864	0.382633	4	-10.3898	21.7232	Two Sample t-test	two.sided	C1 vs P2	0.42254
286	OTU3260_unidentified_fungus	1385.67	7182	-2.87922	0.0450484	4	-11385.8	-206.906	Two Sample t-test	two.sided	C1 vs P2	0.0821331
287	OTU3308_Incertae_sedis	1047.67	57.6667	8.99088	0.000847126	4	684.281	1295.72	Two Sample t-test	two.sided	C1 vs P2	0.00693103	*
288	OTU3314_Torulaceae	26.6667	2	2.78503	0.0495632	4	0.0760066	49.2573	Two Sample t-test	two.sided	C1 vs P2	0.0883304
289	OTU3318_Arthopyreniaceae	24.3333	2.33333	3.74252	0.0200771	4	5.67895	38.321	Two Sample t-test	two.sided	C1 vs P2	0.0469335	.
290	OTU3344_Periconiaceae	1	0	1.73205	0.158302	4	-0.602981	2.60298	Two Sample t-test	two.sided	C1 vs P2	0.209518
291	OTU3349_Pleosporaceae	119.667	5.33333	4.13313	0.014457	4	37.5295	191.137	Two Sample t-test	two.sided	C1 vs P2	0.0366516	.
292	OTU3392_unidentified_fungus	88	15.3333	5.37004	0.00580715	4	35.0962	110.237	Two Sample t-test	two.sided	C1 vs P2	0.0209057	.
293	OTU3409_Chaetosphaeriaceae	35	5.66667	2.08932	0.104911	4	-9.64692	68.3136	Two Sample t-test	two.sided	C1 vs P2	0.15229
294	OTU3410_Didymosphaeriaceae	48	7.33333	3.40734	0.0270935	4	7.52977	73.8036	Two Sample t-test	two.sided	C1 vs P2	0.0602079
295	OTU3412_unidentified_fungus	166	11.3333	10.2406	0.000512555	4	112.733	196.6	Two Sample t-test	two.sided	C1 vs P2	0.00576625	*
296	OTU3414_Onygenaceae	38.3333	5.66667	2.115	0.101915	4	-10.2162	75.5495	Two Sample t-test	two.sided	C1 vs P2	0.149143
297	OTU3419_Leptosphaeriaceae	52	8	3.01719	0.0392715	4	3.51084	84.4892	Two Sample t-test	two.sided	C1 vs P2	0.0764846
298	OTU3428_Lophiostomataceae	49.6667	15.6667	5.9589	0.00398153	4	18.1583	49.8417	Two Sample t-test	two.sided	C1 vs P2	0.0159261	.
299	OTU3436_Phomatosporaceae	0.333333	1	-1	0.373901	4	-2.51763	1.1843	Two Sample t-test	two.sided	C1 vs P2	0.415446
300	OTU3438_Aureobasidiaceae	4	0	1.73205	0.158302	4	-2.41193	10.4119	Two Sample t-test	two.sided	C1 vs P2	0.209518
301	OTU3472_Phaeosphaeriaceae	237	11.3333	7.62409	0.00158914	4	143.486	307.847	Two Sample t-test	two.sided	C1 vs P2	0.00995076	*
302	OTU3473_Ophiocordycipitaceae	48.3333	2	4.57772	0.010201	4	18.2316	74.4351	Two Sample t-test	two.sided	C1 vs P2	0.0301014	.
303	OTU3478_Massarinaceae	234	7.66667	25.2873	1.45221e-05	4	201.483	251.184	Two Sample t-test	two.sided	C1 vs P2	0.000871324	**
304	OTU3529_Chaetomiaceae	594	104.667	14.8594	0.000119439	4	397.902	580.764	Two Sample t-test	two.sided	C1 vs P2	0.00268738	*
305	OTU3530_Apiosporaceae	100.667	5.66667	6.05015	0.0037658	4	51.404	138.596	Two Sample t-test	two.sided	C1 vs P2	0.0159261	.
306	OTU3538_Cephalothecaceae	2.33333	0.666667	3.53553	0.0241101	4	0.357838	2.9755	Two Sample t-test	two.sided	C1 vs P2	0.0549344
307	OTU3551_Verrucariaceae	3.66667	0	2.75	0.0513744	4	-0.0352601	7.36859	Two Sample t-test	two.sided	C1 vs P2	0.0906608
308	OTU3585_Bartaliniaceae	30.3333	3.66667	1.32471	0.255879	4	-29.2235	82.5569	Two Sample t-test	two.sided	C1 vs P2	0.31356
309	OTU358_unidentified_fungus	105.333	124.333	-0.176699	0.868331	4	-317.545	279.545	Two Sample t-test	two.sided	C1 vs P2	0.888066
310	OTU3618_Vibrisseaceae	22	0.666667	4.20181	0.0136759	4	7.23682	35.4299	Two Sample t-test	two.sided	C1 vs P2	0.0364641	.
311	OTU3621_Melanommataceae	19.6667	0.333333	2.88561	0.04476	4	0.731381	37.9353	Two Sample t-test	two.sided	C1 vs P2	0.0821331
312	OTU3622_Trichocomaceae	18	1	2.60258	0.0598852	4	-1.13566	35.1357	Two Sample t-test	two.sided	C1 vs P2	0.102337
313	OTU3655_Tubeufiaceae	1.66667	0	1	0.373901	4	-2.96074	6.29408	Two Sample t-test	two.sided	C1 vs P2	0.415446
314	OTU3670_Lasiosphaeriaceae	634	67.3333	2.80951	0.0483408	4	6.66993	1126.66	Two Sample t-test	two.sided	C1 vs P2	0.0870135
315	OTU3672_Cladosporiaceae	119	11.3333	3.8806	0.0178322	4	30.6346	184.699	Two Sample t-test	two.sided	C1 vs P2	0.0422342	.
316	OTU3703_Lentitheciaceae	21.3333	2	1.87979	0.133313	4	-9.22194	47.8886	Two Sample t-test	two.sided	C1 vs P2	0.184588
317	OTU3729_Mycosphaerellaceae	1	1.33333	-0.5	0.64333	4	-2.1843	1.51763	Two Sample t-test	two.sided	C1 vs P2	0.685204
318	OTU3742_unidentified_fungus	43.3333	24.3333	1.14321	0.316726	4	-27.1443	65.1443	Two Sample t-test	two.sided	C1 vs P2	0.382622
319	OTU3748_Cucurbitariaceae	76.6667	2.66667	3.35824	0.028351	4	12.8201	135.18	Two Sample t-test	two.sided	C1 vs P2	0.0622339
320	OTU3815_Leotiaceae	5.33333	0.666667	1.05529	0.350815	4	-7.61124	16.9446	Two Sample t-test	two.sided	C1 vs P2	0.413431
321	OTU3863_unidentified_fungus	1287.33	1363	-0.18688	0.86085	4	-1199.83	1048.5	Two Sample t-test	two.sided	C1 vs P2	0.885446
322	OTU3873_Venturiaceae	9.33333	2.33333	2.1894	0.0937547	4	-1.87691	15.8769	Two Sample t-test	two.sided	C1 vs P2	0.140632
323	OTU3885_Acrospermaceae	60.3333	1	9.03658	0.000830779	4	41.1035	77.5632	Two Sample t-test	two.sided	C1 vs P2	0.00693103	*
324	OTU3904_Teratosphaeriaceae	1.66667	1.33333	0.242536	0.820294	4	-3.48253	4.14919	Two Sample t-test	two.sided	C1 vs P2	0.853485
325	OTU3936_Myrmecridiaceae	6	1.66667	1.43561	0.224449	4	-4.04726	12.7139	Two Sample t-test	two.sided	C1 vs P2	0.278627
326	OTU3944_Dermateaceae	0.666667	0	1	0.373901	4	-1.1843	2.51763	Two Sample t-test	two.sided	C1 vs P2	0.415446
327	OTU4003_Hyaloscyphaceae	145.333	12	3.33391	0.0289997	4	22.2948	244.372	Two Sample t-test	two.sided	C1 vs P2	0.0625976
328	OTU4010_unidentified_fungus	46.6667	3.33333	2.40165	0.0742235	4	-6.7625	93.4292	Two Sample t-test	two.sided	C1 vs P2	0.119288
329	OTU4040_Myxotrichaceae	2	1	0.547723	0.613011	4	-4.06907	6.06907	Two Sample t-test	two.sided	C1 vs P2	0.656798
330	OTU4042_Bulleribasidiaceae	13.3333	0.333333	8.72067	0.000952378	4	8.86112	17.1389	Two Sample t-test	two.sided	C1 vs P2	0.00714284	*
331	OTU4046_Aphelididae	2	2.66667	-0.225018	0.832994	4	-8.89253	7.55919	Two Sample t-test	two.sided	C1 vs P2	0.861718
332	OTU4053_Herpotrichiellaceae	119.667	8.66667	4.18976	0.0138092	4	37.4431	184.557	Two Sample t-test	two.sided	C1 vs P2	0.0364641	.
333	OTU4067_Teloschistaceae	29.3333	0.666667	5.30299	0.0060749	4	13.6579	43.6755	Two Sample t-test	two.sided	C1 vs P2	0.0210285	.
334	OTU4095_unidentified_fungus	36.3333	0.333333	2.59657	0.0602651	4	-2.49381	74.4938	Two Sample t-test	two.sided	C1 vs P2	0.102337
335	OTU4105_Archaeorhizomycetaceae	40.6667	0	2.37263	0.0766016	4	-6.92145	88.2548	Two Sample t-test	two.sided	C1 vs P2	0.12202
336	OTU4124_Sanchytriaceae	4	0	1.73205	0.158302	4	-2.41193	10.4119	Two Sample t-test	two.sided	C1 vs P2	0.209518
337	OTU4147_unidentified_fungus	84.3333	5	3.28534	0.0303481	4	12.2886	146.378	Two Sample t-test	two.sided	C1 vs P2	0.0635193
338	OTU4182_unidentified_fungus	19.6667	5.33333	1.08281	0.339803	4	-22.4189	51.0856	Two Sample t-test	two.sided	C1 vs P2	0.405063
339	OTU430_Physalacriaceae	29.3333	0.333333	4.16177	0.0141249	4	9.65323	48.3468	Two Sample t-test	two.sided	C1 vs P2	0.0364641	.
340	OTU514_unidentified_fungus	12	0.333333	1.66478	0.171288	4	-7.79047	31.1238	Two Sample t-test	two.sided	C1 vs P2	0.22505
341	OTU52_unidentified_fungus	13.6667	0	2.90641	0.0438353	4	0.611141	26.7222	Two Sample t-test	two.sided	C1 vs P2	0.0821331
342	OTU544_unidentified_fungus	9.33333	0	2.19313	0.0933654	4	-2.48243	21.1491	Two Sample t-test	two.sided	C1 vs P2	0.140632
343	OTU590_Physodermataceae	51	0.666667	2.33975	0.0794001	4	-9.3943	110.061	Two Sample t-test	two.sided	C1 vs P2	0.125369
344	OTU597_Malasseziaceae	7	1.66667	1.04372	0.355537	4	-8.85403	19.5207	Two Sample t-test	two.sided	C1 vs P2	0.413431
345	OTU624_unidentified_fungus	624	38	4.32979	0.0123518	4	210.232	961.768	Two Sample t-test	two.sided	C1 vs P2	0.03586	.
346	OTU63_Piptocephalidaceae	5	0.333333	1.03209	0.360342	4	-7.88718	17.2205	Two Sample t-test	two.sided	C1 vs P2	0.415446
347	OTU64_unidentified_fungus	165	262.333	-0.959033	0.391851	4	-379.118	184.451	Two Sample t-test	two.sided	C1 vs P2	0.430081
348	OTU669_unidentified_fungus	60	0.333333	4.29366	0.0127092	4	21.084	98.2494	Two Sample t-test	two.sided	C1 vs P2	0.036312	.
349	OTU699_unidentified_fungus	3.66667	4.33333	-0.165521	0.876563	4	-11.8493	10.516	Two Sample t-test	two.sided	C1 vs P2	0.89142
350	OTU74_unidentified_fungus	288.667	9	4.58135	0.0101731	4	110.18	449.154	Two Sample t-test	two.sided	C1 vs P2	0.0301014	.
351	OTU752_unidentified_fungus	38	2.33333	5.96288	0.00397182	4	19.0595	52.2738	Two Sample t-test	two.sided	C1 vs P2	0.0159261	.
352	OTU766_Incertae_sedis	93	2.66667	1.48807	0.210954	4	-78.2111	258.878	Two Sample t-test	two.sided	C1 vs P2	0.266155
353	OTU844_Halomycetaceae	62.6667	2.66667	7.60639	0.00160318	4	38.0991	81.9009	Two Sample t-test	two.sided	C1 vs P2	0.00995076	*
354	OTU848_unidentified_fungus	4	0.333333	1.80839	0.144818	4	-1.96282	9.29615	Two Sample t-test	two.sided	C1 vs P2	0.195995
355	OTU903_unidentified_fungus	87	3.66667	4.04332	0.0155613	4	26.1104	140.556	Two Sample t-test	two.sided	C1 vs P2	0.0377468	.
356	OTU915_unidentified_fungus	10.6667	0	2.20297	0.0923464	4	-2.77673	24.1101	Two Sample t-test	two.sided	C1 vs P2	0.140632
357	OTU923_unidentified_fungus	111.333	3.66667	13.8358	0.000158183	4	86.0611	129.272	Two Sample t-test	two.sided	C1 vs P2	0.00316365	*
358	OTU92_unidentified_fungus	616.333	14.3333	5.23678	0.00635418	4	282.831	921.169	Two Sample t-test	two.sided	C1 vs P2	0.0211806	.
359	OTU954_Mortierellaceae	10653.7	7834.67	1.98239	0.118477	4	-1129.16	6767.16	Two Sample t-test	two.sided	C1 vs P2	0.16792
360	OTU980_Olpidiaceae	20	4.33333	3.46489	0.025703	4	3.11282	28.2205	Two Sample t-test	two.sided	C1 vs P2	0.0578319
361	OTU102_unidentified_fungus	88.6667	607.333	-2.0528	0.109343	4	-1220.17	182.84	Two Sample t-test	two.sided	C1 vs P3	0.161675
362	OTU104_Amanitaceae	17	24.3333	-0.779769	0.479088	4	-33.4444	18.7777	Two Sample t-test	two.sided	C1 vs P3	0.513513
363	OTU1123_Corticiaceae	21.3333	0	2.20297	0.0923464	4	-5.55346	48.2201	Two Sample t-test	two.sided	C1 vs P3	0.146283
364	OTU1151_unidentified_fungus	15	0	9.81981	0.00060297	4	10.7589	19.2411	Two Sample t-test	two.sided	C1 vs P3	0.00719544	*
365	OTU1158_Glomeraceae	397.333	8	9.6126	0.000654766	4	276.881	501.786	Two Sample t-test	two.sided	C1 vs P3	0.0073252	*
366	OTU1161_unidentified_fungus	9.33333	1	1.40636	0.232347	4	-8.11839	24.7851	Two Sample t-test	two.sided	C1 vs P3	0.279128
367	OTU1224_Piskurozymaceae	1096.67	161.333	8.5521	0.0010263	4	631.677	1238.99	Two Sample t-test	two.sided	C1 vs P3	0.00918542	*
368	OTU1279_unidentified_fungus	82.6667	15.6667	6.47042	0.00293932	4	38.2504	95.7496	Two Sample t-test	two.sided	C1 vs P3	0.0162105	.
369	OTU1301_Spizellomycetaceae	377.667	50.6667	6.07131	0.00371785	4	177.461	476.539	Two Sample t-test	two.sided	C1 vs P3	0.017513	.
370	OTU130_unidentified_fungus	9.33333	0.333333	4.0704	0.0152179	4	2.86105	15.139	Two Sample t-test	two.sided	C1 vs P3	0.0415684	.
371	OTU1318_Ceratobasidiaceae	44.6667	3.33333	5.73804	0.00456991	4	21.3335	61.3332	Two Sample t-test	two.sided	C1 vs P3	0.0202548	.
372	OTU1385_Stephanosporaceae	8.66667	1	2.63828	0.057684	4	-0.401496	15.7348	Two Sample t-test	two.sided	C1 vs P3	0.105362
373	OTU1448_Incertae_sedis	3.66667	0	2.52357	0.0651085	4	-0.367415	7.70075	Two Sample t-test	two.sided	C1 vs P3	0.114259
374	OTU1492_Paraglomeraceae	337	4.66667	4.00728	0.0160328	4	102.076	562.591	Two Sample t-test	two.sided	C1 vs P3	0.0422039	.
375	OTU1504_unidentified_fungus	686.333	22	6.32237	0.0032023	4	372.594	956.073	Two Sample t-test	two.sided	C1 vs P3	0.0168591	.
376	OTU1507_Entolomataceae	796.333	40.6667	11.0313	0.000383905	4	565.474	945.859	Two Sample t-test	two.sided	C1 vs P3	0.00572658	*
377	OTU1554_unidentified_fungus	25	131.667	-3.08206	0.0368578	4	-202.756	-10.5769	Two Sample t-test	two.sided	C1 vs P3	0.0767156
378	OTU1576_unidentified_fungus	112	6.33333	6.16494	0.00351443	4	58.0785	153.255	Two Sample t-test	two.sided	C1 vs P3	0.0170022	.
379	OTU1595_unidentified_fungus	1083	36.6667	8.29637	0.00115256	4	696.17	1396.5	Two Sample t-test	two.sided	C1 vs P3	0.00982419	*
380	OTU1673_unidentified_fungus	1418.33	26	26.7274	1.16489e-05	4	1247.7	1536.97	Two Sample t-test	two.sided	C1 vs P3	0.000764334	**
381	OTU1736_Mrakiaceae	10.3333	5.33333	0.970269	0.386856	4	-9.3076	19.3076	Two Sample t-test	two.sided	C1 vs P3	0.422239
382	OTU1737_unidentified_fungus	31	4	2.77501	0.0500733	4	-0.0139215	54.0139	Two Sample t-test	two.sided	C1 vs P3	0.0953523
383	OTU1738_Thelephoraceae	1	0.333333	0.632456	0.561438	4	-2.25996	3.5933	Two Sample t-test	two.sided	C1 vs P3	0.591488
384	OTU1781_Clavariaceae	7	0	4.58258	0.0101636	4	2.75891	11.2411	Two Sample t-test	two.sided	C1 vs P3	0.031786	.
385	OTU1782_Claroideoglomeraceae	390.667	5.33333	5.69451	0.00469815	4	197.458	573.208	Two Sample t-test	two.sided	C1 vs P3	0.0202548	.
386	OTU1783_unidentified_fungus	11.3333	1	1.68121	0.168016	4	-6.73171	27.3984	Two Sample t-test	two.sided	C1 vs P3	0.222777
387	OTU1805_Mucoraceae	120.667	843.333	-2.15034	0.0979438	4	-1655.75	210.414	Two Sample t-test	two.sided	C1 vs P3	0.152452
388	OTU1807_unidentified_fungus	19.6667	1.33333	2.74657	0.0515559	4	-0.199423	36.8661	Two Sample t-test	two.sided	C1 vs P3	0.0971422
389	OTU1833_unidentified_fungus	6	0	1.2	0.296351	4	-7.88223	19.8822	Two Sample t-test	two.sided	C1 vs P3	0.342238
390	OTU1852_Sebacinaceae	327.333	5.33333	3.66528	0.0214803	4	78.0851	565.915	Two Sample t-test	two.sided	C1 vs P3	0.0512662
391	OTU1853_Hydnodontaceae	218.667	5.66667	2.83257	0.0472219	4	4.22027	421.78	Two Sample t-test	two.sided	C1 vs P3	0.0908895
392	OTU1879_Leucosporidiaceae	10	31	-0.986303	0.379822	4	-80.115	38.115	Two Sample t-test	two.sided	C1 vs P3	0.418688
393	OTU1930_unidentified_fungus	319.667	24	6.16895	0.00350601	4	162.597	428.737	Two Sample t-test	two.sided	C1 vs P3	0.0170022	.
394	OTU1961_unidentified_fungus	1017.33	50.6667	6.4415	0.00298853	4	550.01	1383.32	Two Sample t-test	two.sided	C1 vs P3	0.0162105	.
395	OTU1981_Lyophyllaceae	19	12.6667	1.11765	0.326311	4	-9.39986	22.0665	Two Sample t-test	two.sided	C1 vs P3	0.372036
396	OTU2021_Incertae_sedis	628.333	62.6667	15.7542	9.48393e-05	4	465.976	665.357	Two Sample t-test	two.sided	C1 vs P3	0.00290214	*
397	OTU2030_unidentified_fungus	12	46.3333	-6.18867	0.00346505	4	-49.7364	-18.9302	Two Sample t-test	two.sided	C1 vs P3	0.0170022	.
398	OTU2034_unidentified_fungus	10.3333	0.333333	3.48743	0.0251815	4	2.03871	17.9613	Two Sample t-test	two.sided	C1 vs P3	0.0585389
399	OTU2038_Inocybaceae	1.66667	1.66667	0	1	4	-6.54414	6.54414	Two Sample t-test	two.sided	C1 vs P3	1
400	OTU2060_unidentified_fungus	7585	919.333	20.3641	3.43356e-05	4	5756.87	7574.47	Two Sample t-test	two.sided	C1 vs P3	0.00153652	*
401	OTU2101_Serendipitaceae	43.3333	2.33333	3.13027	0.0351762	4	4.63434	77.3657	Two Sample t-test	two.sided	C1 vs P3	0.0755113
402	OTU2174_Rhizophydiaceae	53.6667	1	2.41963	0.0727924	4	-7.76665	113.1	Two Sample t-test	two.sided	C1 vs P3	0.12223
403	OTU2188_Psathyrellaceae	126.333	4	26.2143	1.25834e-05	4	109.377	135.29	Two Sample t-test	two.sided	C1 vs P3	0.000764334	**
404	OTU2189_Cystobasidiaceae	20.6667	1	4.06173	0.0153269	4	6.22327	33.1101	Two Sample t-test	two.sided	C1 vs P3	0.0415684	.
405	OTU2216_Bolbitiaceae	209.667	6.33333	5.23167	0.00637641	4	95.4244	311.242	Two Sample t-test	two.sided	C1 vs P3	0.0237787	.
406	OTU2217_Strophariaceae	38.6667	2.33333	2.05405	0.109188	4	-12.7783	85.4449	Two Sample t-test	two.sided	C1 vs P3	0.161675
407	OTU2266_Sebacinaceae	42.6667	1.66667	2.21847	0.0907668	4	-10.3121	92.3121	Two Sample t-test	two.sided	C1 vs P3	0.145065
408	OTU2268_Sporidiobolaceae	23.3333	2.33333	4.59475	0.0100707	4	8.31043	33.6896	Two Sample t-test	two.sided	C1 vs P3	0.031786	.
409	OTU2270_unidentified_fungus	19	0	2.57763	0.0614811	4	-1.4655	39.4655	Two Sample t-test	two.sided	C1 vs P3	0.111163
410	OTU2326_unidentified_fungus	31	0.333333	2.9093	0.043709	4	1.40037	59.933	Two Sample t-test	two.sided	C1 vs P3	0.0864247
411	OTU2328_Diversisporaceae	140.333	3	11.8149	0.000293743	4	105.061	169.606	Two Sample t-test	two.sided	C1 vs P3	0.00478	*
412	OTU2353_unidentified_fungus	0.666667	0	2	0.116117	4	-0.258815	1.59215	Two Sample t-test	two.sided	C1 vs P3	0.167355
413	OTU2379_Debaryomycetaceae	8.33333	0	1.4861	0.211446	4	-7.23568	23.9023	Two Sample t-test	two.sided	C1 vs P3	0.262839
414	OTU238_unidentified_fungus	12.6667	0	1.65217	0.173843	4	-8.61941	33.9527	Two Sample t-test	two.sided	C1 vs P3	0.227138
415	OTU2409_Pluteaceae	37.6667	1.33333	2.46521	0.0693027	4	-4.58719	77.2539	Two Sample t-test	two.sided	C1 vs P3	0.120439
416	OTU2413_Mycenaceae	11.6667	0.666667	0.982997	0.381263	4	-20.0692	42.0692	Two Sample t-test	two.sided	C1 vs P3	0.418688
417	OTU2445_Pyriculariaceae	9.33333	0.666667	2.10888	0.10262	4	-2.74344	20.0768	Two Sample t-test	two.sided	C1 vs P3	0.157
418	OTU2446_unidentified_fungus	12.3333	0	2.54719	0.0634947	4	-1.11006	25.7767	Two Sample t-test	two.sided	C1 vs P3	0.11255
419	OTU2462_unidentified_fungus	739.333	13.6667	15.0532	0.000113491	4	591.823	859.51	Two Sample t-test	two.sided	C1 vs P3	0.00290214	*
420	OTU2489_unidentified_fungus	1.33333	0	1.51186	0.205106	4	-1.11526	3.78193	Two Sample t-test	two.sided	C1 vs P3	0.256742
421	OTU2517_Clavicipitaceae	224.333	16.3333	6.83203	0.0024007	4	123.472	292.528	Two Sample t-test	two.sided	C1 vs P3	0.0159157	.
422	OTU2544_Incertae_sedis	46.3333	92.6667	-1.59654	0.185604	4	-126.909	34.2421	Two Sample t-test	two.sided	C1 vs P3	0.238865
423	OTU2599_Lipomycetaceae	152.333	10.3333	6.58588	0.0027525	4	82.1363	201.864	Two Sample t-test	two.sided	C1 vs P3	0.0162105	.
424	OTU2643_Meruliaceae	4.33333	0.333333	1.94666	0.12343	4	-1.70505	9.70505	Two Sample t-test	two.sided	C1 vs P3	0.170973
425	OTU2655_Archaeosporaceae	421.333	10.3333	6.61795	0.00270323	4	238.572	583.428	Two Sample t-test	two.sided	C1 vs P3	0.0162105	.
426	OTU2672_unidentified_fungus	74	5	10.5634	0.000454382	4	50.8643	87.1357	Two Sample t-test	two.sided	C1 vs P3	0.00625649	*
427	OTU2675_Peltigeraceae	5	0	2.16506	0.0963411	4	-1.41193	11.4119	Two Sample t-test	two.sided	C1 vs P3	0.151272
428	OTU2692_Amylocorticiaceae	4.33333	0.666667	1.06341	0.347533	4	-5.90659	13.2399	Two Sample t-test	two.sided	C1 vs P3	0.388802
429	OTU2701_unidentified_fungus	3	0.666667	1.94145	0.12417	4	-1.00354	5.67021	Two Sample t-test	two.sided	C1 vs P3	0.170973
430	OTU2710_Plectosphaerellaceae	514.667	104.333	7.00609	0.002185	4	247.722	572.944	Two Sample t-test	two.sided	C1 vs P3	0.0156446	.
431	OTU2750_unidentified_fungus	49.3333	1	3.09775	0.0363001	4	5.01328	91.6534	Two Sample t-test	two.sided	C1 vs P3	0.0764438
432	OTU2762_Trichosporonaceae	422.667	265.667	0.692114	0.526944	4	-472.812	786.812	Two Sample t-test	two.sided	C1 vs P3	0.561446
433	OTU2766_Pyronemataceae	4248	8509.33	-1.08481	0.339016	4	-15167.7	6645.08	Two Sample t-test	two.sided	C1 vs P3	0.38166
434	OTU2771_Tremellaceae	10.6667	0.333333	1.34276	0.250484	4	-11.0331	31.6997	Two Sample t-test	two.sided	C1 vs P3	0.293438
435	OTU2775_unidentified_fungus	1352.67	453	5.40248	0.00568283	4	437.309	1362.02	Two Sample t-test	two.sided	C1 vs P3	0.0223157	.
436	OTU2811_unidentified_fungus	16	10.6667	1.37199	0.241982	4	-5.45955	16.1262	Two Sample t-test	two.sided	C1 vs P3	0.286852
437	OTU2815_Hypocreaceae	69.3333	12	2.71549	0.0532344	4	-1.287	115.954	Two Sample t-test	two.sided	C1 vs P3	0.0992599
438	OTU2834_Incertae_sedis	0	0	#N/A	#N/A	4	#N/A	#N/A	Two Sample t-test	two.sided	C1 vs P3	#N/A	#N/A
439	OTU2862_Magnaporthaceae	58	2	4.2332	0.0133358	4	19.2711	92.7289	Two Sample t-test	two.sided	C1 vs P3	0.0390852	.
440	OTU2863_Pleurotheciaceae	7.66667	0	1.99435	0.116868	4	-3.00651	18.3398	Two Sample t-test	two.sided	C1 vs P3	0.167355
441	OTU2899_Trimorphomycetaceae	179.333	21.6667	6.90824	0.00230316	4	94.2999	221.033	Two Sample t-test	two.sided	C1 vs P3	0.0158564	.
442	OTU2900_Microascaceae	247	59	4.56504	0.0102994	4	73.659	302.341	Two Sample t-test	two.sided	C1 vs P3	0.031786	.
443	OTU2907_Stachybotryaceae	11.6667	0.666667	2.23504	0.0891107	4	-2.66457	24.6646	Two Sample t-test	two.sided	C1 vs P3	0.143701
444	OTU2917_Nectriaceae	1692.67	202.333	4.67555	0.00947907	4	605.34	2375.33	Two Sample t-test	two.sided	C1 vs P3	0.031786	.
445	OTU2954_Incertae_sedis	207	13.6667	7.87242	0.00140731	4	125.149	261.518	Two Sample t-test	two.sided	C1 vs P3	0.0109525	.
446	OTU2967_Sporormiaceae	508.333	66.3333	4.10849	0.0147503	4	143.304	740.696	Two Sample t-test	two.sided	C1 vs P3	0.0412547	.
447	OTU2969_unidentified_fungus	600	21.6667	5.38882	0.00573477	4	280.363	876.304	Two Sample t-test	two.sided	C1 vs P3	0.0223157	.
448	OTU3001_Pseudeurotiaceae	34.6667	0.333333	11.9735	0.000278828	4	26.372	42.2946	Two Sample t-test	two.sided	C1 vs P3	0.00478	*
449	OTU3007_Didymellaceae	621.333	169.667	3.77186	0.019573	4	119.197	784.136	Two Sample t-test	two.sided	C1 vs P3	0.0486607	.
450	OTU3036_Coniochaetaceae	340.667	26	14.4463	0.000133466	4	254.191	375.142	Two Sample t-test	two.sided	C1 vs P3	0.00291466	*
451	OTU303_Acaulosporaceae	0.333333	16	-1.79186	0.147631	4	-39.9418	8.60849	Two Sample t-test	two.sided	C1 vs P3	0.200196
452	OTU3049_Bionectriaceae	184.667	19	8.61131	0.000999553	4	112.253	219.081	Two Sample t-test	two.sided	C1 vs P3	0.00918542	*
453	OTU3069_Ascobolaceae	344.333	5.33333	3.12266	0.0354354	4	37.5855	640.414	Two Sample t-test	two.sided	C1 vs P3	0.0755113
454	OTU3103_Microdochiaceae	73.3333	3.33333	5.62455	0.00491366	4	35.4459	104.554	Two Sample t-test	two.sided	C1 vs P3	0.0204545	.
455	OTU3129_Incertae_sedis	11.6667	19.6667	-0.588348	0.587914	4	-45.7524	29.7524	Two Sample t-test	two.sided	C1 vs P3	0.611841
456	OTU3161_Helotiaceae	400	37.6667	5.12702	0.00685268	4	166.118	558.549	Two Sample t-test	two.sided	C1 vs P3	0.0250332	.
457	OTU3162_unidentified_fungus	3.33333	0.333333	1.59099	0.186822	4	-2.23532	8.23532	Two Sample t-test	two.sided	C1 vs P3	0.238865
458	OTU3192_Pseudeurotiaceae	6541.67	1537.67	3.93469	0.0170357	4	1473.01	8534.99	Two Sample t-test	two.sided	C1 vs P3	0.0436159	.
459	OTU3196_Aspergillaceae	43.3333	48	-0.179872	0.865998	4	-76.6998	67.3665	Two Sample t-test	two.sided	C1 vs P3	0.880759
460	OTU3198_Cordycipitaceae	3.66667	10	-0.631931	0.561748	4	-34.1594	21.4927	Two Sample t-test	two.sided	C1 vs P3	0.591488
461	OTU3241_unidentified_fungus	251.333	53	10.0032	0.000561312	4	143.285	253.382	Two Sample t-test	two.sided	C1 vs P3	0.00717678	*
462	OTU3244_Thelebolaceae	103.667	12.6667	8.08911	0.00126925	4	59.7658	122.234	Two Sample t-test	two.sided	C1 vs P3	0.0103271	.
463	OTU3255_Gymnoascaceae	67.3333	129.667	-2.41617	0.0730648	4	-133.961	9.29441	Two Sample t-test	two.sided	C1 vs P3	0.12223
464	OTU3257_Ascodesmidaceae	14	2	1.51587	0.204136	4	-9.97897	33.979	Two Sample t-test	two.sided	C1 vs P3	0.256742
465	OTU3258_unidentified_fungus	6.66667	0	1.17041	0.306809	4	-9.14797	22.4813	Two Sample t-test	two.sided	C1 vs P3	0.352043
466	OTU3260_unidentified_fungus	1385.67	3822	-15.5034	0.000101039	4	-2872.65	-2000.02	Two Sample t-test	two.sided	C1 vs P3	0.00290214	*
467	OTU3308_Incertae_sedis	1047.67	55.6667	8.98205	0.000850332	4	685.362	1298.64	Two Sample t-test	two.sided	C1 vs P3	0.00845608	*
468	OTU3314_Torulaceae	26.6667	1	2.90411	0.0439366	4	1.12831	50.205	Two Sample t-test	two.sided	C1 vs P3	0.0864247
469	OTU3318_Arthopyreniaceae	24.3333	1.66667	3.74896	0.0199651	4	5.87995	39.4534	Two Sample t-test	two.sided	C1 vs P3	0.0489554	.
470	OTU3344_Periconiaceae	1	7	-1.96396	0.121004	4	-14.4822	2.48218	Two Sample t-test	two.sided	C1 vs P3	0.170549
471	OTU3349_Pleosporaceae	119.667	4.66667	4.15361	0.0142186	4	38.1293	191.871	Two Sample t-test	two.sided	C1 vs P3	0.0403988	.
472	OTU3392_unidentified_fungus	88	14.3333	4.81117	0.00857797	4	31.1549	116.178	Two Sample t-test	two.sided	C1 vs P3	0.030107	.
473	OTU3409_Chaetosphaeriaceae	35	5.33333	2.07482	0.106646	4	-10.0321	69.3654	Two Sample t-test	two.sided	C1 vs P3	0.160417
474	OTU3410_Didymosphaeriaceae	48	16	2.66976	0.05582	4	-1.27876	65.2788	Two Sample t-test	two.sided	C1 vs P3	0.103008
475	OTU3412_unidentified_fungus	166	36.6667	5.6765	0.00475252	4	66.0748	192.592	Two Sample t-test	two.sided	C1 vs P3	0.0202548	.
476	OTU3414_Onygenaceae	38.3333	76.6667	-2.10947	0.102552	4	-88.7869	12.1203	Two Sample t-test	two.sided	C1 vs P3	0.157
477	OTU3419_Leptosphaeriaceae	52	4	3.28634	0.0303197	4	7.44742	88.5526	Two Sample t-test	two.sided	C1 vs P3	0.0678403
478	OTU3428_Lophiostomataceae	49.6667	120.333	-0.933206	0.403543	4	-280.912	139.579	Two Sample t-test	two.sided	C1 vs P3	0.437783
479	OTU3436_Phomatosporaceae	0.333333	1	-1	0.373901	4	-2.51763	1.1843	Two Sample t-test	two.sided	C1 vs P3	0.415704
480	OTU3438_Aureobasidiaceae	4	0	1.73205	0.158302	4	-2.41193	10.4119	Two Sample t-test	two.sided	C1 vs P3	0.211464
481	OTU3472_Phaeosphaeriaceae	237	33.3333	6.45307	0.00296873	4	116.039	291.295	Two Sample t-test	two.sided	C1 vs P3	0.0162105	.
482	OTU3473_Ophiocordycipitaceae	48.3333	2	4.57772	0.010201	4	18.2316	74.4351	Two Sample t-test	two.sided	C1 vs P3	0.031786	.
483	OTU3478_Massarinaceae	234	5	26.097	1.28101e-05	4	204.637	253.363	Two Sample t-test	two.sided	C1 vs P3	0.000764334	**
484	OTU3529_Chaetomiaceae	594	270.333	2.97396	0.0409834	4	21.4958	625.838	Two Sample t-test	two.sided	C1 vs P3	0.0843221
485	OTU3530_Apiosporaceae	100.667	98	0.0842105	0.936935	4	-85.2541	90.5874	Two Sample t-test	two.sided	C1 vs P3	0.942199
486	OTU3538_Cephalothecaceae	2.33333	4.33333	-0.460179	0.669291	4	-14.0668	10.0668	Two Sample t-test	two.sided	C1 vs P3	0.688524
487	OTU3551_Verrucariaceae	3.66667	0.333333	2.42536	0.072343	4	-0.482525	7.14919	Two Sample t-test	two.sided	C1 vs P3	0.12223
488	OTU3585_Bartaliniaceae	30.3333	2.66667	1.37496	0.241134	4	-28.2005	83.5339	Two Sample t-test	two.sided	C1 vs P3	0.286852
489	OTU358_unidentified_fungus	105.333	13.6667	14.1072	0.000146547	4	73.6257	109.708	Two Sample t-test	two.sided	C1 vs P3	0.00291466	*
490	OTU3618_Vibrisseaceae	22	0.666667	4.22924	0.0133782	4	7.32825	35.3384	Two Sample t-test	two.sided	C1 vs P3	0.0390852	.
491	OTU3621_Melanommataceae	19.6667	0	2.939	0.0424314	4	1.08775	38.2456	Two Sample t-test	two.sided	C1 vs P3	0.0863093
492	OTU3622_Trichocomaceae	18	7	1.46126	0.217744	4	-9.90032	31.9003	Two Sample t-test	two.sided	C1 vs P3	0.265144
493	OTU3655_Tubeufiaceae	1.66667	1.33333	0.156174	0.883461	4	-5.59264	6.25931	Two Sample t-test	two.sided	C1 vs P3	0.893444
494	OTU3670_Lasiosphaeriaceae	634	58.3333	2.85408	0.046205	4	15.6585	1135.67	Two Sample t-test	two.sided	C1 vs P3	0.0898988
495	OTU3672_Cladosporiaceae	119	22.6667	3.33753	0.0289022	4	16.195	176.472	Two Sample t-test	two.sided	C1 vs P3	0.0654872
496	OTU3703_Lentitheciaceae	21.3333	0	2.07753	0.10632	4	-7.17691	49.8436	Two Sample t-test	two.sided	C1 vs P3	0.160417
497	OTU3729_Mycosphaerellaceae	1	0.666667	0.377964	0.724659	4	-2.11526	2.78193	Two Sample t-test	two.sided	C1 vs P3	0.741222
498	OTU3742_unidentified_fungus	43.3333	13.3333	1.84211	0.139257	4	-15.2162	75.2162	Two Sample t-test	two.sided	C1 vs P3	0.190282
499	OTU3748_Cucurbitariaceae	76.6667	7.33333	3.14431	0.0347036	4	8.11148	130.555	Two Sample t-test	two.sided	C1 vs P3	0.0755113
500	OTU3815_Leotiaceae	5.33333	0	1.21999	0.289477	4	-6.80425	17.4709	Two Sample t-test	two.sided	C1 vs P3	0.336471
501	OTU3863_unidentified_fungus	1287.33	1080.33	1.4101	0.231321	4	-200.576	614.576	Two Sample t-test	two.sided	C1 vs P3	0.279128
502	OTU3873_Venturiaceae	9.33333	3.66667	1.66699	0.170844	4	-3.77143	15.1048	Two Sample t-test	two.sided	C1 vs P3	0.224861
503	OTU3885_Acrospermaceae	60.3333	0.333333	9.23381	0.000764561	4	41.959	78.041	Two Sample t-test	two.sided	C1 vs P3	0.00805037	*
504	OTU3904_Teratosphaeriaceae	1.66667	0.666667	1.34164	0.250815	4	-1.06944	3.06944	Two Sample t-test	two.sided	C1 vs P3	0.293438
505	OTU3936_Myrmecridiaceae	6	0.333333	1.95003	0.122952	4	-2.4015	13.7348	Two Sample t-test	two.sided	C1 vs P3	0.170973
506	OTU3944_Dermateaceae	0.666667	17	-1.4622	0.217504	4	-47.3473	14.6807	Two Sample t-test	two.sided	C1 vs P3	0.265144
507	OTU4003_Hyaloscyphaceae	145.333	5.33333	3.50451	0.0247948	4	29.085	250.915	Two Sample t-test	two.sided	C1 vs P3	0.0583984
508	OTU4010_unidentified_fungus	46.6667	3.66667	2.3844	0.0756269	4	-7.07019	93.0702	Two Sample t-test	two.sided	C1 vs P3	0.124753
509	OTU4040_Myxotrichaceae	2	36	-3.20318	0.0328013	4	-63.4705	-4.52955	Two Sample t-test	two.sided	C1 vs P3	0.0724868
510	OTU4042_Bulleribasidiaceae	13.3333	3.33333	4.00892	0.016011	4	3.07433	16.9257	Two Sample t-test	two.sided	C1 vs P3	0.0422039	.
511	OTU4046_Aphelididae	2	8	-0.821584	0.457461	4	-26.2763	14.2763	Two Sample t-test	two.sided	C1 vs P3	0.493287
512	OTU4053_Herpotrichiellaceae	119.667	41.6667	2.43882	0.0712988	4	-10.798	166.798	Two Sample t-test	two.sided	C1 vs P3	0.12223
513	OTU4067_Teloschistaceae	29.3333	0	5.46805	0.00544126	4	14.4391	44.2276	Two Sample t-test	two.sided	C1 vs P3	0.022136	.
514	OTU4095_unidentified_fungus	36.3333	1	2.54702	0.063506	4	-3.18272	73.8494	Two Sample t-test	two.sided	C1 vs P3	0.11255
515	OTU4105_Archaeorhizomycetaceae	40.6667	0	2.37263	0.0766016	4	-6.92145	88.2548	Two Sample t-test	two.sided	C1 vs P3	0.124753
516	OTU4124_Sanchytriaceae	4	0	1.73205	0.158302	4	-2.41193	10.4119	Two Sample t-test	two.sided	C1 vs P3	0.211464
517	OTU4147_unidentified_fungus	84.3333	1.66667	3.45378	0.0259646	4	16.2122	149.121	Two Sample t-test	two.sided	C1 vs P3	0.0595854
518	OTU4182_unidentified_fungus	19.6667	1340	-1.97409	0.119608	4	-3177.31	536.64	Two Sample t-test	two.sided	C1 vs P3	0.169919
519	OTU430_Physalacriaceae	29.3333	0	4.21444	0.0135379	4	10.0087	48.658	Two Sample t-test	two.sided	C1 vs P3	0.0390852	.
520	OTU514_unidentified_fungus	12	0.666667	1.61175	0.182308	4	-8.18972	30.8564	Two Sample t-test	two.sided	C1 vs P3	0.236472
521	OTU52_unidentified_fungus	13.6667	0	2.90641	0.0438353	4	0.611141	26.7222	Two Sample t-test	two.sided	C1 vs P3	0.0864247
522	OTU544_unidentified_fungus	9.33333	2	1.55954	0.19388	4	-5.72219	20.3889	Two Sample t-test	two.sided	C1 vs P3	0.246131
523	OTU590_Physodermataceae	51	0	2.37188	0.0766639	4	-8.69895	110.699	Two Sample t-test	two.sided	C1 vs P3	0.124753
524	OTU597_Malasseziaceae	7	3.33333	0.607373	0.576394	4	-13.0945	20.4279	Two Sample t-test	two.sided	C1 vs P3	0.60336
525	OTU624_unidentified_fungus	624	99.6667	3.87308	0.0179464	4	148.461	900.205	Two Sample t-test	two.sided	C1 vs P3	0.0452452	.
526	OTU63_Piptocephalidaceae	5	0	1.10883	0.329678	4	-7.51968	17.5197	Two Sample t-test	two.sided	C1 vs P3	0.373496
527	OTU64_unidentified_fungus	165	72.3333	5.87907	0.00418282	4	48.904	136.429	Two Sample t-test	two.sided	C1 vs P3	0.0191981	.
528	OTU669_unidentified_fungus	60	0.333333	4.29366	0.0127092	4	21.084	98.2494	Two Sample t-test	two.sided	C1 vs P3	0.0385584	.
529	OTU699_unidentified_fungus	3.66667	2.33333	0.508001	0.638186	4	-5.95392	8.62058	Two Sample t-test	two.sided	C1 vs P3	0.660319
530	OTU74_unidentified_fungus	288.667	6.66667	4.61847	0.00989245	4	112.473	451.527	Two Sample t-test	two.sided	C1 vs P3	0.031786	.
531	OTU752_unidentified_fungus	38	1	6.60995	0.00271541	4	21.4585	52.5415	Two Sample t-test	two.sided	C1 vs P3	0.0162105	.
532	OTU766_Incertae_sedis	93	3.66667	1.4708	0.215304	4	-79.3025	257.969	Two Sample t-test	two.sided	C1 vs P3	0.265144
533	OTU844_Halomycetaceae	62.6667	2.33333	7.64865	0.00156991	4	38.4324	82.2342	Two Sample t-test	two.sided	C1 vs P3	0.0117089	.
534	OTU848_unidentified_fungus	4	0	2	0.116117	4	-1.55289	9.55289	Two Sample t-test	two.sided	C1 vs P3	0.167355
535	OTU903_unidentified_fungus	87	5.33333	3.93324	0.0170565	4	24.0187	139.315	Two Sample t-test	two.sided	C1 vs P3	0.0436159	.
536	OTU915_unidentified_fungus	10.6667	0.666667	2.04598	0.110192	4	-3.57023	23.5702	Two Sample t-test	two.sided	C1 vs P3	0.161675
537	OTU923_unidentified_fungus	111.333	24.3333	3.67898	0.021223	4	21.343	152.657	Two Sample t-test	two.sided	C1 vs P3	0.0512662
538	OTU92_unidentified_fungus	616.333	10.3333	5.27225	0.00620268	4	286.871	925.129	Two Sample t-test	two.sided	C1 vs P3	0.023623	.
539	OTU954_Mortierellaceae	10653.7	36752.3	-4.8327	0.0084447	4	-41092.7	-11104.7	Two Sample t-test	two.sided	C1 vs P3	0.030107	.
540	OTU980_Olpidiaceae	20	3	4.77659	0.00879749	4	7.11856	26.8814	Two Sample t-test	two.sided	C1 vs P3	0.0302837	.
541	OTU102_unidentified_fungus	88.6667	368.333	-4.61777	0.00989764	4	-447.817	-111.517	Two Sample t-test	two.sided	C1 vs P4	0.0357092	.
542	OTU104_Amanitaceae	17	4.33333	1.75468	0.154172	4	-7.37594	32.7093	Two Sample t-test	two.sided	C1 vs P4	0.229973
543	OTU1123_Corticiaceae	21.3333	0.333333	2.16727	0.0961038	4	-5.90272	47.9027	Two Sample t-test	two.sided	C1 vs P4	0.157822
544	OTU1151_unidentified_fungus	15	0	9.81981	0.00060297	4	10.7589	19.2411	Two Sample t-test	two.sided	C1 vs P4	0.00830243	*
545	OTU1158_Glomeraceae	397.333	14	9.38377	0.000718549	4	269.914	496.753	Two Sample t-test	two.sided	C1 vs P4	0.00901536	*
546	OTU1161_unidentified_fungus	9.33333	0	1.58265	0.188666	4	-7.04011	25.7068	Two Sample t-test	two.sided	C1 vs P4	0.259879
547	OTU1224_Piskurozymaceae	1096.67	245	7.90193	0.00138745	4	552.422	1150.91	Two Sample t-test	two.sided	C1 vs P4	0.0108161	.
548	OTU1279_unidentified_fungus	82.6667	16.6667	6.62582	0.0026913	4	38.3437	93.6563	Two Sample t-test	two.sided	C1 vs P4	0.016784	.
549	OTU1301_Spizellomycetaceae	377.667	21.3333	6.68543	0.00260304	4	208.349	504.318	Two Sample t-test	two.sided	C1 vs P4	0.016784	.
550	OTU130_unidentified_fungus	9.33333	1.33333	3.50076	0.024879	4	1.65522	14.3448	Two Sample t-test	two.sided	C1 vs P4	0.0622359
551	OTU1318_Ceratobasidiaceae	44.6667	0.666667	6.29285	0.00325813	4	24.5869	63.4131	Two Sample t-test	two.sided	C1 vs P4	0.0175082	.
552	OTU1385_Stephanosporaceae	8.66667	0.666667	2.73505	0.0521706	4	-0.121069	16.1211	Two Sample t-test	two.sided	C1 vs P4	0.103761
553	OTU1448_Incertae_sedis	3.66667	1	1.70561	0.163279	4	-1.67423	7.00756	Two Sample t-test	two.sided	C1 vs P4	0.239565
554	OTU1492_Paraglomeraceae	337	4.33333	4.01344	0.015951	4	102.532	562.801	Two Sample t-test	two.sided	C1 vs P4	0.0475871	.
555	OTU1504_unidentified_fungus	686.333	29	6.25802	0.00332559	4	365.699	948.967	Two Sample t-test	two.sided	C1 vs P4	0.0175082	.
556	OTU1507_Entolomataceae	796.333	115.667	9.26251	0.000755477	4	476.636	884.697	Two Sample t-test	two.sided	C1 vs P4	0.00901536	*
557	OTU1554_unidentified_fungus	25	170	-2.70693	0.0537074	4	-293.723	3.7235	Two Sample t-test	two.sided	C1 vs P4	0.105276
558	OTU1576_unidentified_fungus	112	11.3333	5.7412	0.00456077	4	51.9842	149.349	Two Sample t-test	two.sided	C1 vs P4	0.0220643	.
559	OTU1595_unidentified_fungus	1083	82.3333	7.89844	0.00138978	4	648.914	1352.42	Two Sample t-test	two.sided	C1 vs P4	0.0108161	.
560	OTU1673_unidentified_fungus	1418.33	41.3333	26.4082	1.22196e-05	4	1232.23	1521.77	Two Sample t-test	two.sided	C1 vs P4	0.00218731	*
561	OTU1736_Mrakiaceae	10.3333	9	0.171499	0.872158	4	-20.2524	22.9191	Two Sample t-test	two.sided	C1 vs P4	0.892093
562	OTU1737_unidentified_fungus	31	2.33333	3.15716	0.0342774	4	3.45684	53.8765	Two Sample t-test	two.sided	C1 vs P4	0.0786623
563	OTU1738_Thelephoraceae	1	0	1	0.373901	4	-1.77645	3.77645	Two Sample t-test	two.sided	C1 vs P4	0.431795
564	OTU1781_Clavariaceae	7	2.66667	1.85714	0.136852	4	-2.14504	10.8117	Two Sample t-test	two.sided	C1 vs P4	0.2106
565	OTU1782_Claroideoglomeraceae	390.667	7.66667	5.65653	0.00481368	4	195.009	570.991	Two Sample t-test	two.sided	C1 vs P4	0.022675	.
566	OTU1783_unidentified_fungus	11.3333	0	1.8521	0.137654	4	-5.65625	28.3229	Two Sample t-test	two.sided	C1 vs P4	0.2106
567	OTU1805_Mucoraceae	120.667	80.3333	1.03411	0.359504	4	-67.9559	148.623	Two Sample t-test	two.sided	C1 vs P4	0.426167
568	OTU1807_unidentified_fungus	19.6667	13.6667	0.690268	0.527988	4	-18.1336	30.1336	Two Sample t-test	two.sided	C1 vs P4	0.579815
569	OTU1833_unidentified_fungus	6	0	1.2	0.296351	4	-7.88223	19.8822	Two Sample t-test	two.sided	C1 vs P4	0.363335
570	OTU1852_Sebacinaceae	327.333	12.6667	3.5818	0.0231304	4	70.7518	558.582	Two Sample t-test	two.sided	C1 vs P4	0.0608875
571	OTU1853_Hydnodontaceae	218.667	10.3333	2.7653	0.0505741	4	-0.839863	417.507	Two Sample t-test	two.sided	C1 vs P4	0.102872
572	OTU1879_Leucosporidiaceae	10	6	0.489898	0.64986	4	-18.6696	26.6696	Two Sample t-test	two.sided	C1 vs P4	0.692411
573	OTU1930_unidentified_fungus	319.667	15.6667	6.39532	0.00306925	4	172.022	435.978	Two Sample t-test	two.sided	C1 vs P4	0.0171686	.
574	OTU1961_unidentified_fungus	1017.33	100.333	6.04575	0.00377588	4	495.877	1338.12	Two Sample t-test	two.sided	C1 vs P4	0.0187745	.
575	OTU1981_Lyophyllaceae	19	7.66667	2	0.116117	4	-4.39986	27.0665	Two Sample t-test	two.sided	C1 vs P4	0.183503
576	OTU2021_Incertae_sedis	628.333	163.333	12.4385	0.000240211	4	361.206	568.794	Two Sample t-test	two.sided	C1 vs P4	0.00484935	*
577	OTU2030_unidentified_fungus	12	32.6667	-1.78904	0.148116	4	-52.7396	11.4063	Two Sample t-test	two.sided	C1 vs P4	0.224684
578	OTU2034_unidentified_fungus	10.3333	1.66667	2.90689	0.0438145	4	0.388907	16.9444	Two Sample t-test	two.sided	C1 vs P4	0.092312
579	OTU2038_Inocybaceae	1.66667	0	1	0.373901	4	-2.96074	6.29408	Two Sample t-test	two.sided	C1 vs P4	0.431795
580	OTU2060_unidentified_fungus	7585	2518.67	4.8261	0.00848527	4	2151.69	7980.98	Two Sample t-test	two.sided	C1 vs P4	0.0323162	.
581	OTU2101_Serendipitaceae	43.3333	10.3333	2.3341	0.0798925	4	-6.25395	72.254	Two Sample t-test	two.sided	C1 vs P4	0.14401
582	OTU2174_Rhizophydiaceae	53.6667	4	2.2818	0.0846184	4	-10.7667	110.1	Two Sample t-test	two.sided	C1 vs P4	0.148497
583	OTU2188_Psathyrellaceae	126.333	37	15.8472	9.26621e-05	4	73.682	104.985	Two Sample t-test	two.sided	C1 vs P4	0.0036608	*
584	OTU2189_Cystobasidiaceae	20.6667	1.33333	3.98346	0.0163539	4	5.85812	32.8086	Two Sample t-test	two.sided	C1 vs P4	0.0478927	.
585	OTU2216_Bolbitiaceae	209.667	6	5.22719	0.00639596	4	95.4882	311.845	Two Sample t-test	two.sided	C1 vs P4	0.0249857	.
586	OTU2217_Strophariaceae	38.6667	9	1.62708	0.179049	4	-20.9564	80.2898	Two Sample t-test	two.sided	C1 vs P4	0.25236
587	OTU2266_Sebacinaceae	42.6667	2	2.19972	0.092682	4	-10.6621	91.9955	Two Sample t-test	two.sided	C1 vs P4	0.153612
588	OTU2268_Sporidiobolaceae	23.3333	0.333333	5.29206	0.00611995	4	10.9332	35.0668	Two Sample t-test	two.sided	C1 vs P4	0.0248971	.
589	OTU2270_unidentified_fungus	19	0	2.57763	0.0614811	4	-1.4655	39.4655	Two Sample t-test	two.sided	C1 vs P4	0.117076
590	OTU2326_unidentified_fungus	31	3	2.58492	0.0610098	4	-2.0746	58.0746	Two Sample t-test	two.sided	C1 vs P4	0.117076
591	OTU2328_Diversisporaceae	140.333	3	11.7714	0.000298005	4	104.941	169.725	Two Sample t-test	two.sided	C1 vs P4	0.00484935	*
592	OTU2353_unidentified_fungus	0.666667	36.3333	-1.51685	0.2039	4	-100.951	29.6175	Two Sample t-test	two.sided	C1 vs P4	0.273985
593	OTU2379_Debaryomycetaceae	8.33333	0	1.4861	0.211446	4	-7.23568	23.9023	Two Sample t-test	two.sided	C1 vs P4	0.280361
594	OTU238_unidentified_fungus	12.6667	0	1.65217	0.173843	4	-8.61941	33.9527	Two Sample t-test	two.sided	C1 vs P4	0.246968
595	OTU2409_Pluteaceae	37.6667	3.33333	2.32772	0.0804528	4	-6.61858	75.2852	Two Sample t-test	two.sided	C1 vs P4	0.14401
596	OTU2413_Mycenaceae	11.6667	6	0.454995	0.672714	4	-28.9122	40.2455	Two Sample t-test	two.sided	C1 vs P4	0.701379
597	OTU2445_Pyriculariaceae	9.33333	0	2.30159	0.0827945	4	-1.92564	20.5923	Two Sample t-test	two.sided	C1 vs P4	0.146735
598	OTU2446_unidentified_fungus	12.3333	2	2.07591	0.106514	4	-3.48706	24.1537	Two Sample t-test	two.sided	C1 vs P4	0.173328
599	OTU2462_unidentified_fungus	739.333	22.6667	14.7579	0.000122708	4	581.838	851.495	Two Sample t-test	two.sided	C1 vs P4	0.0036608	*
600	OTU2489_unidentified_fungus	1.33333	0	1.51186	0.205106	4	-1.11526	3.78193	Two Sample t-test	two.sided	C1 vs P4	0.273985
601	OTU2517_Clavicipitaceae	224.333	25.3333	6.4899	0.00290673	4	113.866	284.134	Two Sample t-test	two.sided	C1 vs P4	0.016784	.
602	OTU2544_Incertae_sedis	46.3333	462.667	-11.9742	0.000278761	4	-512.868	-319.799	Two Sample t-test	two.sided	C1 vs P4	0.00484935	*
603	OTU2599_Lipomycetaceae	152.333	26	6.08448	0.00368837	4	68.6854	183.981	Two Sample t-test	two.sided	C1 vs P4	0.0187745	.
604	OTU2643_Meruliaceae	4.33333	1	1.58114	0.189004	4	-2.51993	9.18659	Two Sample t-test	two.sided	C1 vs P4	0.259879
605	OTU2655_Archaeosporaceae	421.333	55.6667	5.44808	0.00551349	4	179.316	552.017	Two Sample t-test	two.sided	C1 vs P4	0.0240711	.
606	OTU2672_unidentified_fungus	74	12.6667	6.50945	0.00287446	4	35.1731	87.4935	Two Sample t-test	two.sided	C1 vs P4	0.016784	.
607	OTU2675_Peltigeraceae	5	1.66667	1.17041	0.306809	4	-4.57399	11.2407	Two Sample t-test	two.sided	C1 vs P4	0.371588
608	OTU2692_Amylocorticiaceae	4.33333	0	1.28093	0.269443	4	-5.05928	13.7259	Two Sample t-test	two.sided	C1 vs P4	0.337275
609	OTU2701_unidentified_fungus	3	0	3	0.039942	4	0.223555	5.77645	Two Sample t-test	two.sided	C1 vs P4	0.0882668
610	OTU2710_Plectosphaerellaceae	514.667	75.6667	7.74371	0.00149813	4	281.6	596.4	Two Sample t-test	two.sided	C1 vs P4	0.0111736	.
611	OTU2750_unidentified_fungus	49.3333	0.666667	3.11841	0.0355814	4	5.33672	91.9966	Two Sample t-test	two.sided	C1 vs P4	0.0806212
612	OTU2762_Trichosporonaceae	422.667	49.6667	3.54043	0.0240041	4	80.4892	665.511	Two Sample t-test	two.sided	C1 vs P4	0.0622359
613	OTU2766_Pyronemataceae	4248	6902.67	-1.69157	0.165987	4	-7011.88	1702.55	Two Sample t-test	two.sided	C1 vs P4	0.23961
614	OTU2771_Tremellaceae	10.6667	0	1.38738	0.23762	4	-10.6797	32.013	Two Sample t-test	two.sided	C1 vs P4	0.308218
615	OTU2775_unidentified_fungus	1352.67	1471	-0.459365	0.669828	4	-833.551	596.884	Two Sample t-test	two.sided	C1 vs P4	0.701379
616	OTU2811_unidentified_fungus	16	10.6667	1.37199	0.241982	4	-5.45955	16.1262	Two Sample t-test	two.sided	C1 vs P4	0.311617
617	OTU2815_Hypocreaceae	69.3333	8	3.00071	0.039914	4	4.58387	118.083	Two Sample t-test	two.sided	C1 vs P4	0.0882668
618	OTU2834_Incertae_sedis	0	0	#N/A	#N/A	4	#N/A	#N/A	Two Sample t-test	two.sided	C1 vs P4	#N/A	#N/A
619	OTU2862_Magnaporthaceae	58	0.666667	4.3285	0.0123643	4	20.5578	94.1089	Two Sample t-test	two.sided	C1 vs P4	0.0402402	.
620	OTU2863_Pleurotheciaceae	7.66667	0	1.99435	0.116868	4	-3.00651	18.3398	Two Sample t-test	two.sided	C1 vs P4	0.183503
621	OTU2899_Trimorphomycetaceae	179.333	38.6667	5.55793	0.00513025	4	70.3971	210.936	Two Sample t-test	two.sided	C1 vs P4	0.0235465	.
622	OTU2900_Microascaceae	247	93.6667	3.9664	0.0165885	4	46.0014	260.665	Two Sample t-test	two.sided	C1 vs P4	0.0478927	.
623	OTU2907_Stachybotryaceae	11.6667	2.33333	1.778	0.150033	4	-5.24117	23.9078	Two Sample t-test	two.sided	C1 vs P4	0.22568
624	OTU2917_Nectriaceae	1692.67	436	3.92261	0.0172098	4	367.191	2146.14	Two Sample t-test	two.sided	C1 vs P4	0.0488977	.
625	OTU2954_Incertae_sedis	207	77	3.82795	0.0186509	4	35.7098	224.29	Two Sample t-test	two.sided	C1 vs P4	0.0519364
626	OTU2967_Sporormiaceae	508.333	126	3.49393	0.0250334	4	78.513	686.154	Two Sample t-test	two.sided	C1 vs P4	0.0622359
627	OTU2969_unidentified_fungus	600	32	5.30386	0.00607133	4	270.665	865.335	Two Sample t-test	two.sided	C1 vs P4	0.0248971	.
628	OTU3001_Pseudeurotiaceae	34.6667	2	11.2414	0.0003567	4	24.5985	40.7348	Two Sample t-test	two.sided	C1 vs P4	0.00532077	*
629	OTU3007_Didymellaceae	621.333	160	5.34674	0.00589854	4	221.773	700.894	Two Sample t-test	two.sided	C1 vs P4	0.0248971	.
630	OTU3036_Coniochaetaceae	340.667	34.6667	12.1157	0.000266247	4	235.877	376.123	Two Sample t-test	two.sided	C1 vs P4	0.00484935	*
631	OTU303_Acaulosporaceae	0.333333	0.666667	-0.447214	0.677869	4	-2.40277	1.73611	Two Sample t-test	two.sided	C1 vs P4	0.701379
632	OTU3049_Bionectriaceae	184.667	15.6667	8.36789	0.0011154	4	112.926	225.074	Two Sample t-test	two.sided	C1 vs P4	0.0105135	.
633	OTU3069_Ascobolaceae	344.333	33	2.8382	0.0469533	4	6.77391	615.893	Two Sample t-test	two.sided	C1 vs P4	0.0977283
634	OTU3103_Microdochiaceae	73.3333	24	3.50204	0.0248502	4	10.2215	88.4452	Two Sample t-test	two.sided	C1 vs P4	0.0622359
635	OTU3129_Incertae_sedis	11.6667	51.3333	-1.54689	0.196795	4	-110.863	31.5293	Two Sample t-test	two.sided	C1 vs P4	0.266866
636	OTU3161_Helotiaceae	400	159	3.21343	0.0324828	4	32.7728	449.227	Two Sample t-test	two.sided	C1 vs P4	0.0755119
637	OTU3162_unidentified_fungus	3.33333	6.66667	-0.517088	0.632372	4	-21.2313	14.5646	Two Sample t-test	two.sided	C1 vs P4	0.681895
638	OTU3192_Pseudeurotiaceae	6541.67	2865	3.47813	0.0253952	4	741.736	6611.6	Two Sample t-test	two.sided	C1 vs P4	0.0622703
639	OTU3196_Aspergillaceae	43.3333	92.6667	-1.69323	0.165665	4	-130.227	31.5603	Two Sample t-test	two.sided	C1 vs P4	0.23961
640	OTU3198_Cordycipitaceae	3.66667	1	0.8	0.468527	4	-6.58815	11.9215	Two Sample t-test	two.sided	C1 vs P4	0.520909
641	OTU3241_unidentified_fungus	251.333	76	8.25511	0.0011747	4	116.363	234.303	Two Sample t-test	two.sided	C1 vs P4	0.0105135	.
642	OTU3244_Thelebolaceae	103.667	54	4.42271	0.0114867	4	18.4874	80.8459	Two Sample t-test	two.sided	C1 vs P4	0.0387948	.
643	OTU3255_Gymnoascaceae	67.3333	10	8.26579	0.00116891	4	38.0753	76.5914	Two Sample t-test	two.sided	C1 vs P4	0.0105135	.
644	OTU3257_Ascodesmidaceae	14	5.33333	1.08807	0.337736	4	-13.4483	30.7816	Two Sample t-test	two.sided	C1 vs P4	0.403031
645	OTU3258_unidentified_fungus	6.66667	1.33333	0.911685	0.413509	4	-10.9088	21.5755	Two Sample t-test	two.sided	C1 vs P4	0.471453
646	OTU3260_unidentified_fungus	1385.67	1942.67	-4.58121	0.0101741	4	-894.57	-219.43	Two Sample t-test	two.sided	C1 vs P4	0.0357092	.
647	OTU3308_Incertae_sedis	1047.67	260.667	6.81983	0.00241678	4	466.601	1107.4	Two Sample t-test	two.sided	C1 vs P4	0.0166386	.
648	OTU3314_Torulaceae	26.6667	1.66667	2.82667	0.0475053	4	0.444196	49.5558	Two Sample t-test	two.sided	C1 vs P4	0.0977409
649	OTU3318_Arthopyreniaceae	24.3333	1.66667	3.74896	0.0199651	4	5.87995	39.4534	Two Sample t-test	two.sided	C1 vs P4	0.0541477
650	OTU3344_Periconiaceae	1	10	-2.20454	0.092185	4	-20.3348	2.33479	Two Sample t-test	two.sided	C1 vs P4	0.153612
651	OTU3349_Pleosporaceae	119.667	17.6667	3.64699	0.0218293	4	24.3477	179.652	Two Sample t-test	two.sided	C1 vs P4	0.0583201
652	OTU3392_unidentified_fungus	88	41	2.23894	0.088726	4	-11.2833	105.283	Two Sample t-test	two.sided	C1 vs P4	0.15174
653	OTU3409_Chaetosphaeriaceae	35	3	2.26652	0.0860577	4	-7.19937	71.1994	Two Sample t-test	two.sided	C1 vs P4	0.149557
654	OTU3410_Didymosphaeriaceae	48	28.3333	1.45601	0.2191	4	-17.8353	57.1687	Two Sample t-test	two.sided	C1 vs P4	0.28654
655	OTU3412_unidentified_fungus	166	31.3333	8.36599	0.00111637	4	89.9744	179.359	Two Sample t-test	two.sided	C1 vs P4	0.0105135	.
656	OTU3414_Onygenaceae	38.3333	283.333	-3.32433	0.02926	4	-449.621	-40.3785	Two Sample t-test	two.sided	C1 vs P4	0.0689151
657	OTU3419_Leptosphaeriaceae	52	55	-0.160052	0.880597	4	-55.0414	49.0414	Two Sample t-test	two.sided	C1 vs P4	0.895607
658	OTU3428_Lophiostomataceae	49.6667	50.6667	-0.0923624	0.930851	4	-31.0604	29.0604	Two Sample t-test	two.sided	C1 vs P4	0.936081
659	OTU3436_Phomatosporaceae	0.333333	1	-1	0.373901	4	-2.51763	1.1843	Two Sample t-test	two.sided	C1 vs P4	0.431795
660	OTU3438_Aureobasidiaceae	4	2.33333	0.507673	0.638396	4	-7.44827	10.7816	Two Sample t-test	two.sided	C1 vs P4	0.684268
661	OTU3472_Phaeosphaeriaceae	237	81.6667	4.49325	0.0108787	4	59.3506	251.316	Two Sample t-test	two.sided	C1 vs P4	0.0374477	.
662	OTU3473_Ophiocordycipitaceae	48.3333	23	1.57583	0.190191	4	-19.3014	69.968	Two Sample t-test	two.sided	C1 vs P4	0.259879
663	OTU3478_Massarinaceae	234	27.6667	18.7748	4.73891e-05	4	175.82	236.846	Two Sample t-test	two.sided	C1 vs P4	0.0036608	*
664	OTU3529_Chaetomiaceae	594	125.333	15.9495	9.03373e-05	4	387.082	550.251	Two Sample t-test	two.sided	C1 vs P4	0.0036608	*
665	OTU3530_Apiosporaceae	100.667	45	2.4942	0.0671815	4	-6.29915	117.632	Two Sample t-test	two.sided	C1 vs P4	0.125266
666	OTU3538_Cephalothecaceae	2.33333	0.666667	2.23607	0.0890093	4	-0.402773	3.73611	Two Sample t-test	two.sided	C1 vs P4	0.15174
667	OTU3551_Verrucariaceae	3.66667	0	2.75	0.0513744	4	-0.0352601	7.36859	Two Sample t-test	two.sided	C1 vs P4	0.103326
668	OTU3585_Bartaliniaceae	30.3333	5.66667	1.22486	0.287826	4	-31.2465	80.5799	Two Sample t-test	two.sided	C1 vs P4	0.357355
669	OTU358_unidentified_fungus	105.333	21	15.1196	0.000111539	4	68.8471	99.8196	Two Sample t-test	two.sided	C1 vs P4	0.0036608	*
670	OTU3618_Vibrisseaceae	22	0	4.37096	0.0119591	4	8.02553	35.9745	Two Sample t-test	two.sided	C1 vs P4	0.0396423	.
671	OTU3621_Melanommataceae	19.6667	0	2.939	0.0424314	4	1.08775	38.2456	Two Sample t-test	two.sided	C1 vs P4	0.0915087
672	OTU3622_Trichocomaceae	18	11.3333	0.817861	0.459355	4	-15.9651	29.2984	Two Sample t-test	two.sided	C1 vs P4	0.513904
673	OTU3655_Tubeufiaceae	1.66667	0.333333	0.784465	0.476621	4	-3.38572	6.05238	Two Sample t-test	two.sided	C1 vs P4	0.526636
674	OTU3670_Lasiosphaeriaceae	634	210.667	2.00609	0.115312	4	-162.563	1009.23	Two Sample t-test	two.sided	C1 vs P4	0.183503
675	OTU3672_Cladosporiaceae	119	23.6667	3.34875	0.028602	4	16.2926	174.374	Two Sample t-test	two.sided	C1 vs P4	0.0682634
676	OTU3703_Lentitheciaceae	21.3333	5.33333	1.45521	0.219307	4	-14.5269	46.5269	Two Sample t-test	two.sided	C1 vs P4	0.28654
677	OTU3729_Mycosphaerellaceae	1	3.33333	-0.94388	0.398676	4	-9.19689	4.53022	Two Sample t-test	two.sided	C1 vs P4	0.457455
678	OTU3742_unidentified_fungus	43.3333	93	-1.90168	0.129987	4	-122.18	22.8465	Two Sample t-test	two.sided	C1 vs P4	0.202327
679	OTU3748_Cucurbitariaceae	76.6667	10.6667	2.98496	0.0405394	4	4.61049	127.39	Two Sample t-test	two.sided	C1 vs P4	0.0884946
680	OTU3815_Leotiaceae	5.33333	0	1.21999	0.289477	4	-6.80425	17.4709	Two Sample t-test	two.sided	C1 vs P4	0.357355
681	OTU3863_unidentified_fungus	1287.33	1362.33	-0.469274	0.663311	4	-518.735	368.735	Two Sample t-test	two.sided	C1 vs P4	0.701379
682	OTU3873_Venturiaceae	9.33333	4	1.67726	0.168798	4	-3.4952	14.1619	Two Sample t-test	two.sided	C1 vs P4	0.241718
683	OTU3885_Acrospermaceae	60.3333	1	9.10727	0.000806256	4	41.245	77.4217	Two Sample t-test	two.sided	C1 vs P4	0.00901998	*
684	OTU3904_Teratosphaeriaceae	1.66667	0.666667	1.34164	0.250815	4	-1.06944	3.06944	Two Sample t-test	two.sided	C1 vs P4	0.316169
685	OTU3936_Myrmecridiaceae	6	1.33333	1.60591	0.183567	4	-3.4015	12.7348	Two Sample t-test	two.sided	C1 vs P4	0.256707
686	OTU3944_Dermateaceae	0.666667	0.333333	0.447214	0.677869	4	-1.73611	2.40277	Two Sample t-test	two.sided	C1 vs P4	0.701379
687	OTU4003_Hyaloscyphaceae	145.333	9	3.3913	0.0274969	4	24.7178	247.949	Two Sample t-test	two.sided	C1 vs P4	0.0665129
688	OTU4010_unidentified_fungus	46.6667	38.3333	0.322856	0.762976	4	-63.3303	79.9969	Two Sample t-test	two.sided	C1 vs P4	0.784901
689	OTU4040_Myxotrichaceae	2	22	-4.67099	0.00951127	4	-31.888	-8.11197	Two Sample t-test	two.sided	C1 vs P4	0.0354691	.
690	OTU4042_Bulleribasidiaceae	13.3333	29.3333	-2.22118	0.0904939	4	-35.9998	3.99983	Two Sample t-test	two.sided	C1 vs P4	0.152815
691	OTU4046_Aphelididae	2	0.666667	0.632456	0.561438	4	-4.51993	7.18659	Two Sample t-test	two.sided	C1 vs P4	0.612789
692	OTU4053_Herpotrichiellaceae	119.667	406	-4.14971	0.0142636	4	-477.91	-94.7564	Two Sample t-test	two.sided	C1 vs P4	0.0447928	.
693	OTU4067_Teloschistaceae	29.3333	0	5.46805	0.00544126	4	14.4391	44.2276	Two Sample t-test	two.sided	C1 vs P4	0.0240711	.
694	OTU4095_unidentified_fungus	36.3333	1.66667	2.49824	0.0668923	4	-3.8605	73.1938	Two Sample t-test	two.sided	C1 vs P4	0.125266
695	OTU4105_Archaeorhizomycetaceae	40.6667	0.666667	2.33197	0.0800794	4	-7.6241	87.6241	Two Sample t-test	two.sided	C1 vs P4	0.14401
696	OTU4124_Sanchytriaceae	4	9.33333	-0.895828	0.420983	4	-21.863	11.1963	Two Sample t-test	two.sided	C1 vs P4	0.474686
697	OTU4147_unidentified_fungus	84.3333	17.3333	2.69975	0.0541083	4	-1.90334	135.903	Two Sample t-test	two.sided	C1 vs P4	0.105276
698	OTU4182_unidentified_fungus	19.6667	6.33333	1.01699	0.36667	4	-23.0676	49.7343	Two Sample t-test	two.sided	C1 vs P4	0.431795
699	OTU430_Physalacriaceae	29.3333	0.666667	4.09989	0.0148544	4	9.2536	48.0797	Two Sample t-test	two.sided	C1 vs P4	0.0458437	.
700	OTU514_unidentified_fungus	12	0	1.71429	0.161628	4	-7.43512	31.4351	Two Sample t-test	two.sided	C1 vs P4	0.239102
701	OTU52_unidentified_fungus	13.6667	0	2.90641	0.0438353	4	0.611141	26.7222	Two Sample t-test	two.sided	C1 vs P4	0.092312
702	OTU544_unidentified_fungus	9.33333	10.3333	-0.139272	0.895966	4	-20.9355	18.9355	Two Sample t-test	two.sided	C1 vs P4	0.90609
703	OTU590_Physodermataceae	51	0.333333	2.35609	0.0779947	4	-9.03946	110.373	Two Sample t-test	two.sided	C1 vs P4	0.143928
704	OTU597_Malasseziaceae	7	1	1.16923	0.307235	4	-8.24761	20.2476	Two Sample t-test	two.sided	C1 vs P4	0.371588
705	OTU624_unidentified_fungus	624	77.6667	4.01519	0.0159278	4	168.552	924.115	Two Sample t-test	two.sided	C1 vs P4	0.0475871	.
706	OTU63_Piptocephalidaceae	5	0	1.10883	0.329678	4	-7.51968	17.5197	Two Sample t-test	two.sided	C1 vs P4	0.396057
707	OTU64_unidentified_fungus	165	128	1.35045	0.248219	4	-39.0699	113.07	Two Sample t-test	two.sided	C1 vs P4	0.316169
708	OTU669_unidentified_fungus	60	1	4.24325	0.0132292	4	20.3951	97.6049	Two Sample t-test	two.sided	C1 vs P4	0.0422861	.
709	OTU699_unidentified_fungus	3.66667	2.33333	0.894427	0.421648	4	-2.80555	5.47221	Two Sample t-test	two.sided	C1 vs P4	0.474686
710	OTU74_unidentified_fungus	288.667	8.66667	4.59085	0.0101003	4	110.662	449.338	Two Sample t-test	two.sided	C1 vs P4	0.0357092	.
711	OTU752_unidentified_fungus	38	0.333333	6.82658	0.00240786	4	22.3472	52.9861	Two Sample t-test	two.sided	C1 vs P4	0.0166386	.
712	OTU766_Incertae_sedis	93	47.3333	0.612303	0.573434	4	-161.406	252.739	Two Sample t-test	two.sided	C1 vs P4	0.622089
713	OTU844_Halomycetaceae	62.6667	9.33333	6.55386	0.00280281	4	30.7394	75.9272	Two Sample t-test	two.sided	C1 vs P4	0.016784	.
714	OTU848_unidentified_fungus	4	1	1.34164	0.250815	4	-3.20832	9.20832	Two Sample t-test	two.sided	C1 vs P4	0.316169
715	OTU903_unidentified_fungus	87	7.66667	3.81496	0.0188596	4	21.5963	137.07	Two Sample t-test	two.sided	C1 vs P4	0.0519364
716	OTU915_unidentified_fungus	10.6667	0.666667	2.04598	0.110192	4	-3.57023	23.5702	Two Sample t-test	two.sided	C1 vs P4	0.177697
717	OTU923_unidentified_fungus	111.333	3.66667	13.7979	0.000159899	4	86.0017	129.332	Two Sample t-test	two.sided	C1 vs P4	0.00408884	*
718	OTU92_unidentified_fungus	616.333	16.3333	5.22149	0.0064209	4	280.96	919.04	Two Sample t-test	two.sided	C1 vs P4	0.0249857	.
719	OTU954_Mortierellaceae	10653.7	35987.3	-7.92697	0.00137087	4	-34206.9	-16460.5	Two Sample t-test	two.sided	C1 vs P4	0.0108161	.
720	OTU980_Olpidiaceae	20	19.6667	0.0530745	0.960217	4	-17.1041	17.7707	Two Sample t-test	two.sided	C1 vs P4	0.960217
